# Supplementary material for: FoxO1/Rictor axis induces a nongenetic adaptation to ibrutinib via Akt activation in chronic lymphocytic leukemia
Source: PubMed Central journal article supplement (PMC11601945; doi:10.1172/jci173770), 2024-10-22

# **FoxO1/Rictor Axis Induces a Non-Genetic Adaptation to Ibrutinib via Akt Activation in Chronic Lymphocytic Leukemia**

Ondrisova *et al.*

Uncropped original blots from the manuscript

## List of used antibodies

---

| <b>Detected protein</b>               | <b>Manufacturer</b> | <b>Catalog number</b> | <b>Dilution</b> |
|---------------------------------------|---------------------|-----------------------|-----------------|
| <b>Rictor</b>                         | Cell Signaling      | #2114                 | 1:2000          |
| <b>mTOR</b>                           | Cell Signaling      | #2983                 | 1:2000          |
| <b>pmTOR</b>                          | Cell Signaling      | #2974                 | 1:1000          |
| <b>FoxO1</b>                          | Cell Signaling      | #2880                 | 1:2000          |
| <b>pFoxO1</b>                         | Cell Signaling      | #2599                 | 1:1000          |
| <b>Akt</b>                            | Cell Signaling      | #2920                 | 1:2000          |
| <b>pAkt<sup>S473</sup></b>            | Cell Signaling      | #4060                 | 1:1000          |
| <b>pAkt<sup>T308</sup></b>            | Cell Signaling      | #13038                | 1:1000          |
| <b>BTK</b>                            | Cell Signaling      | #3533                 | 1:2000          |
| <b>pBTK</b>                           | Cell Signaling      | #5082                 | 1:1000          |
| <b>GAB1</b>                           | Cell Signaling      | #3232                 | 1:2000          |
| <b>GSK3<math>\alpha/\beta</math></b>  | Cell Signaling      | #5676                 | 1:2000          |
| <b>pGSK3<math>\alpha/\beta</math></b> | Cell Signaling      | #9331                 | 1:2000          |
| <b>cMYC</b>                           | Cell Signaling      | #5605                 | 1:2000          |
| <b>GAPDH</b>                          | Cell Signaling      | #2118                 | 1:2000          |
| <b>Vinculin</b>                       | Santa Cruz          | sc73614               | 1:2000          |

---

Full unedited gels for Figure 1A

CLL No. 17

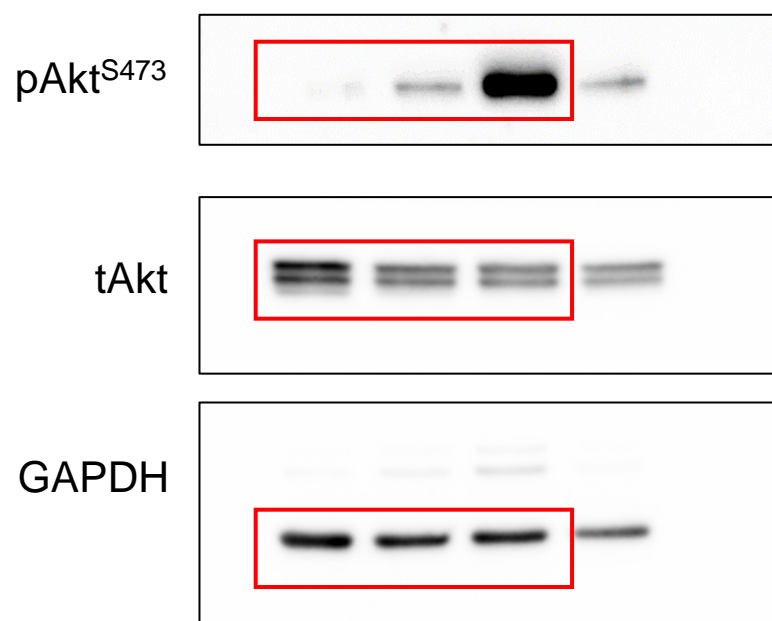

CLL No. 43

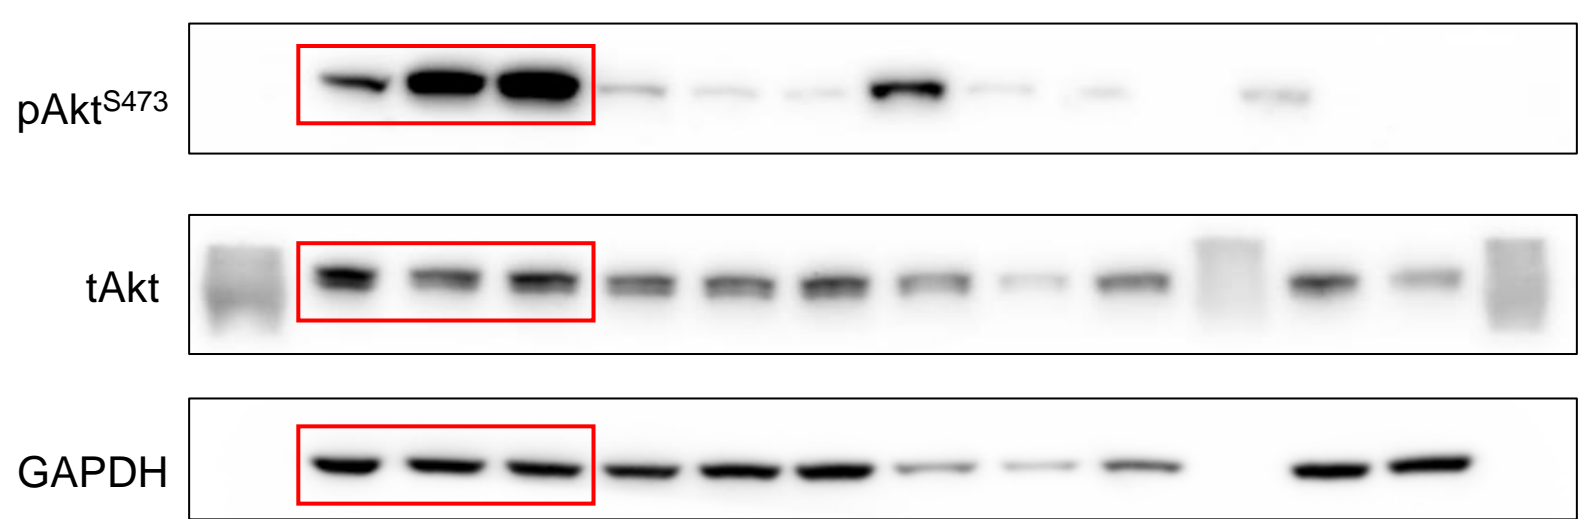

Full unedited gels for Figure 1C

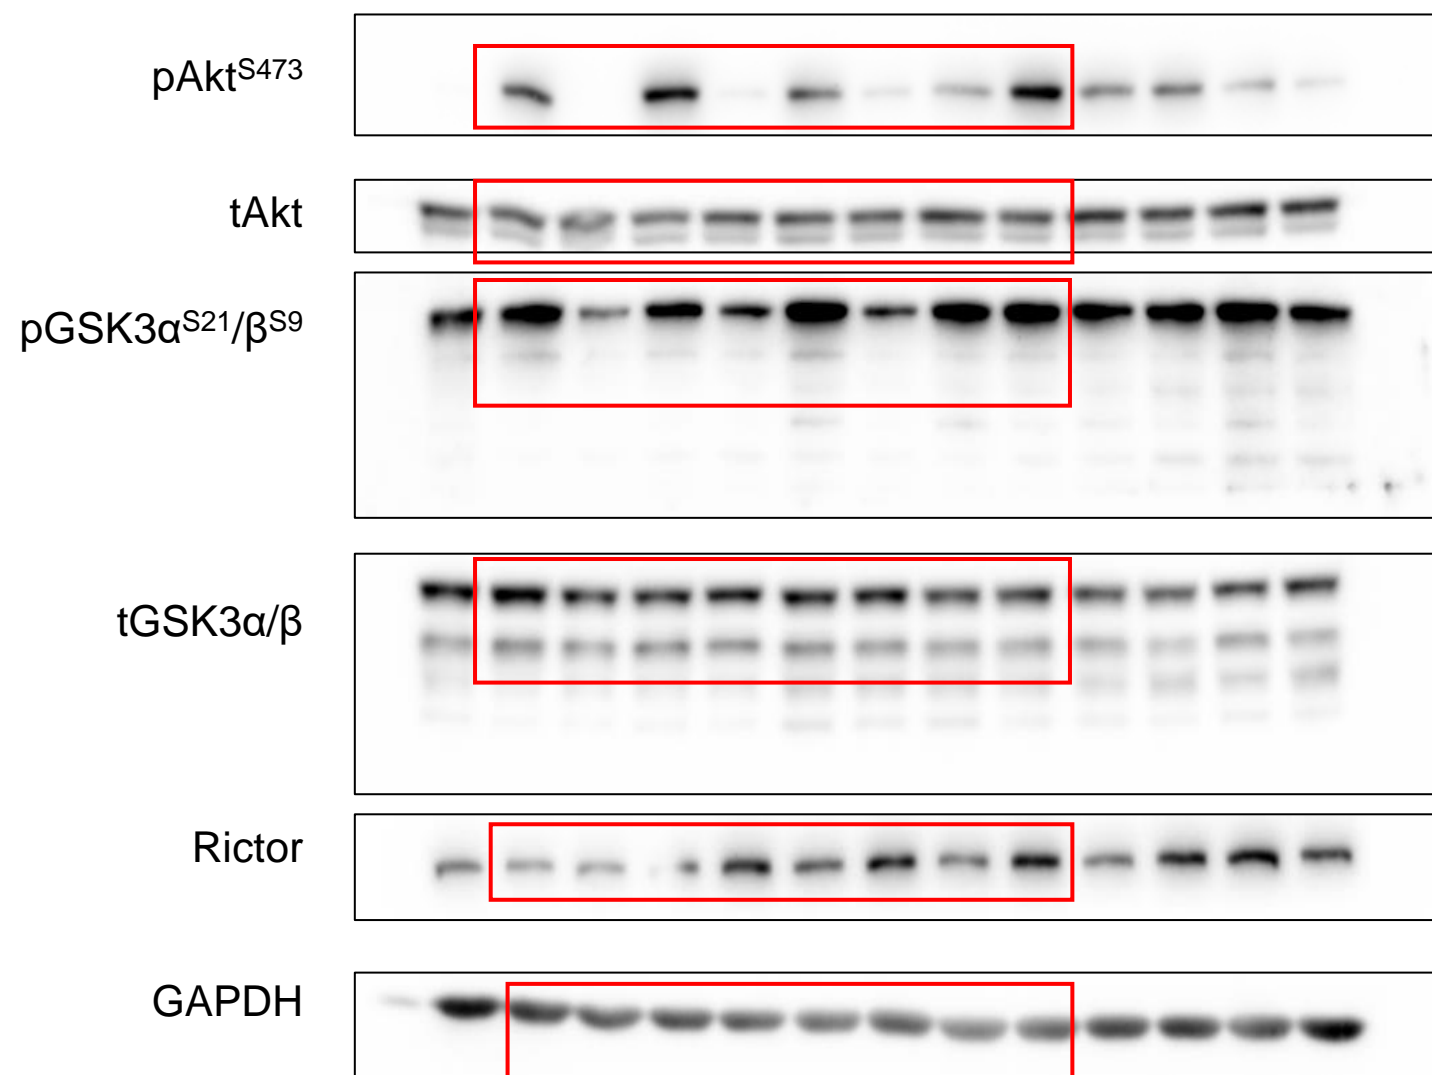

Full unedited gels for Figure 2C CLL No. 47

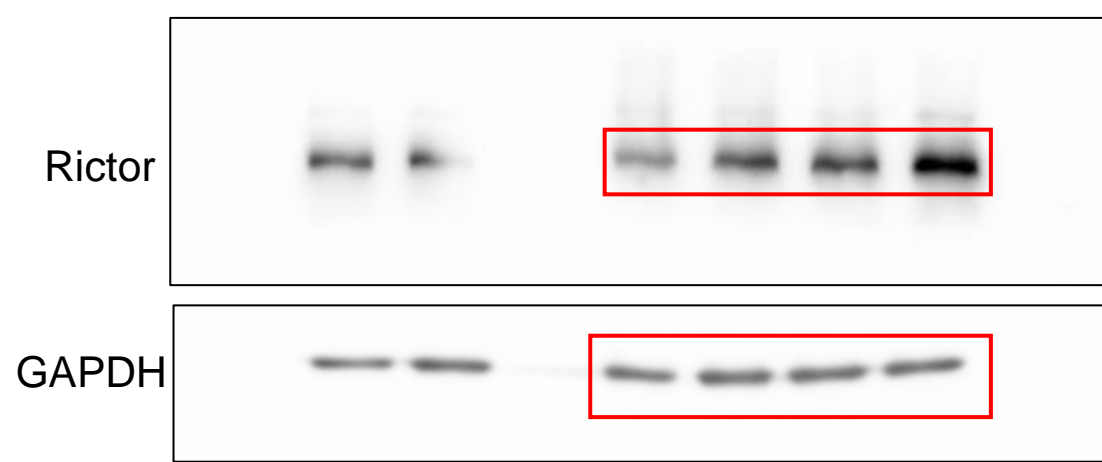

CLL No. 40

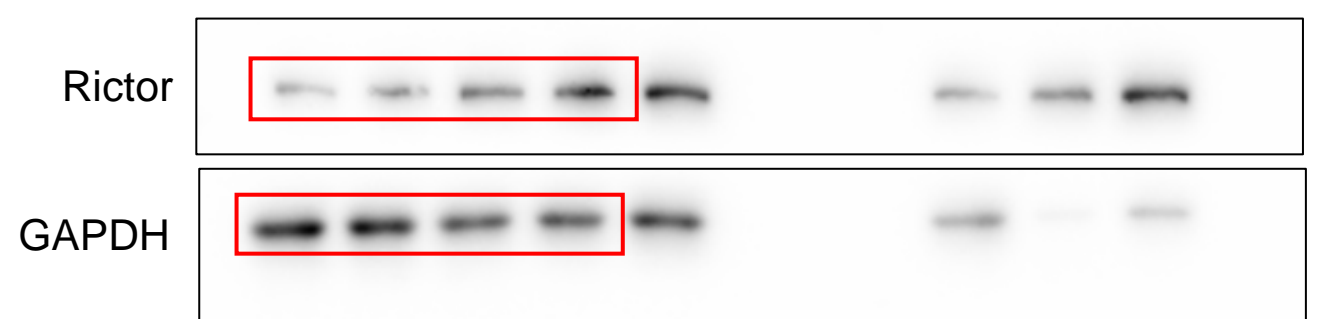

Full unedited gels for Figure 2F

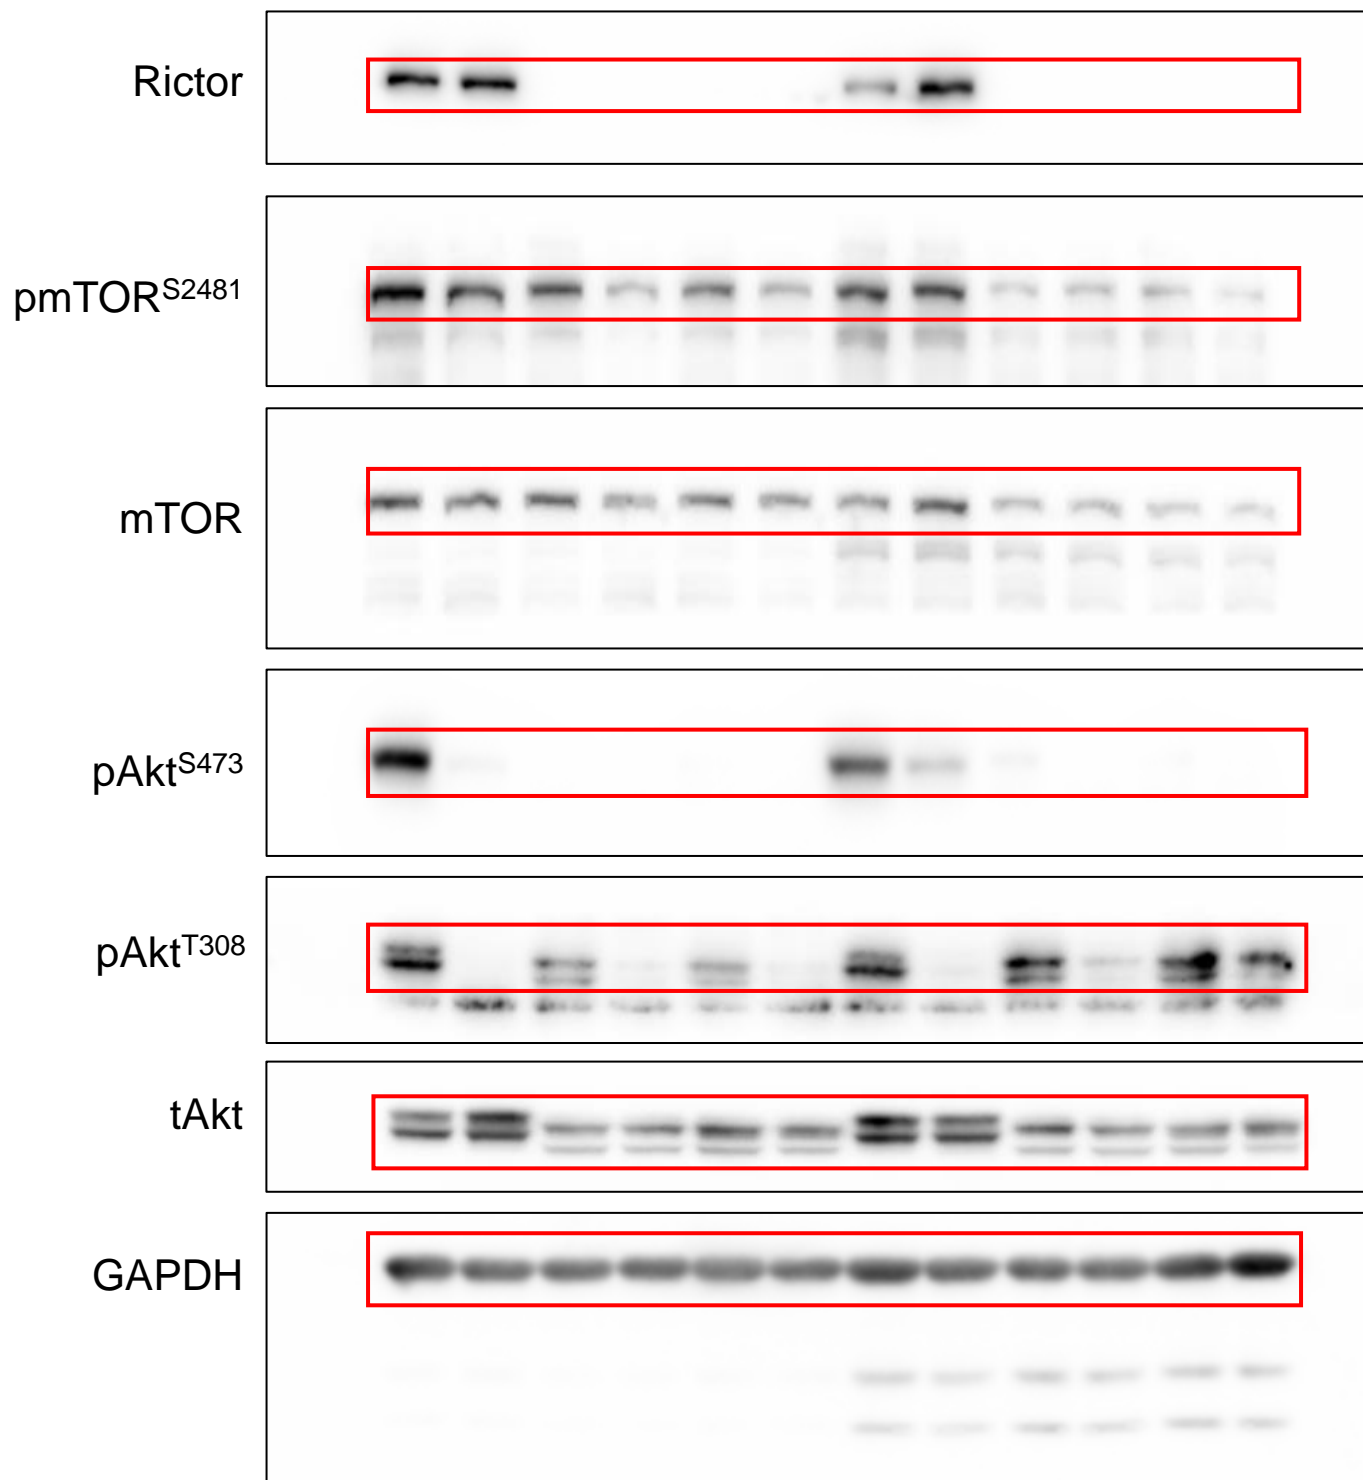

Full unedited gels for Figure 2H

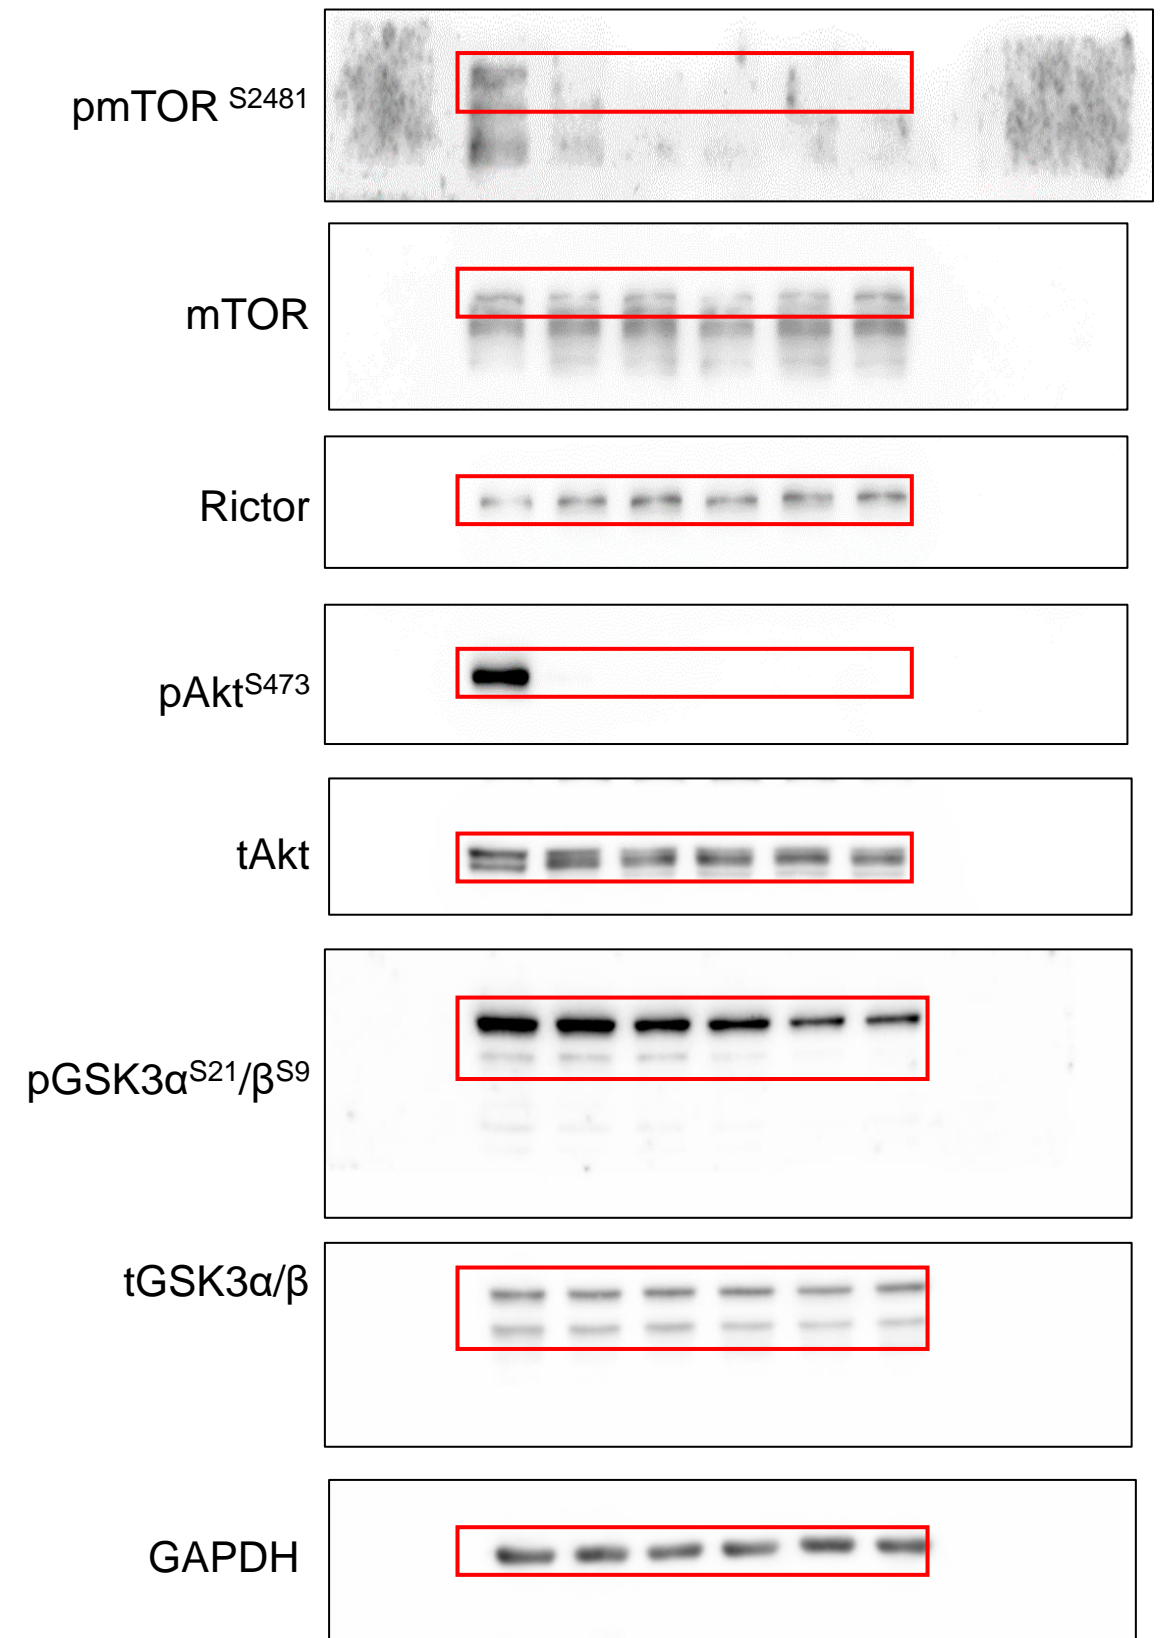

Full unedited gels for Figure 2I

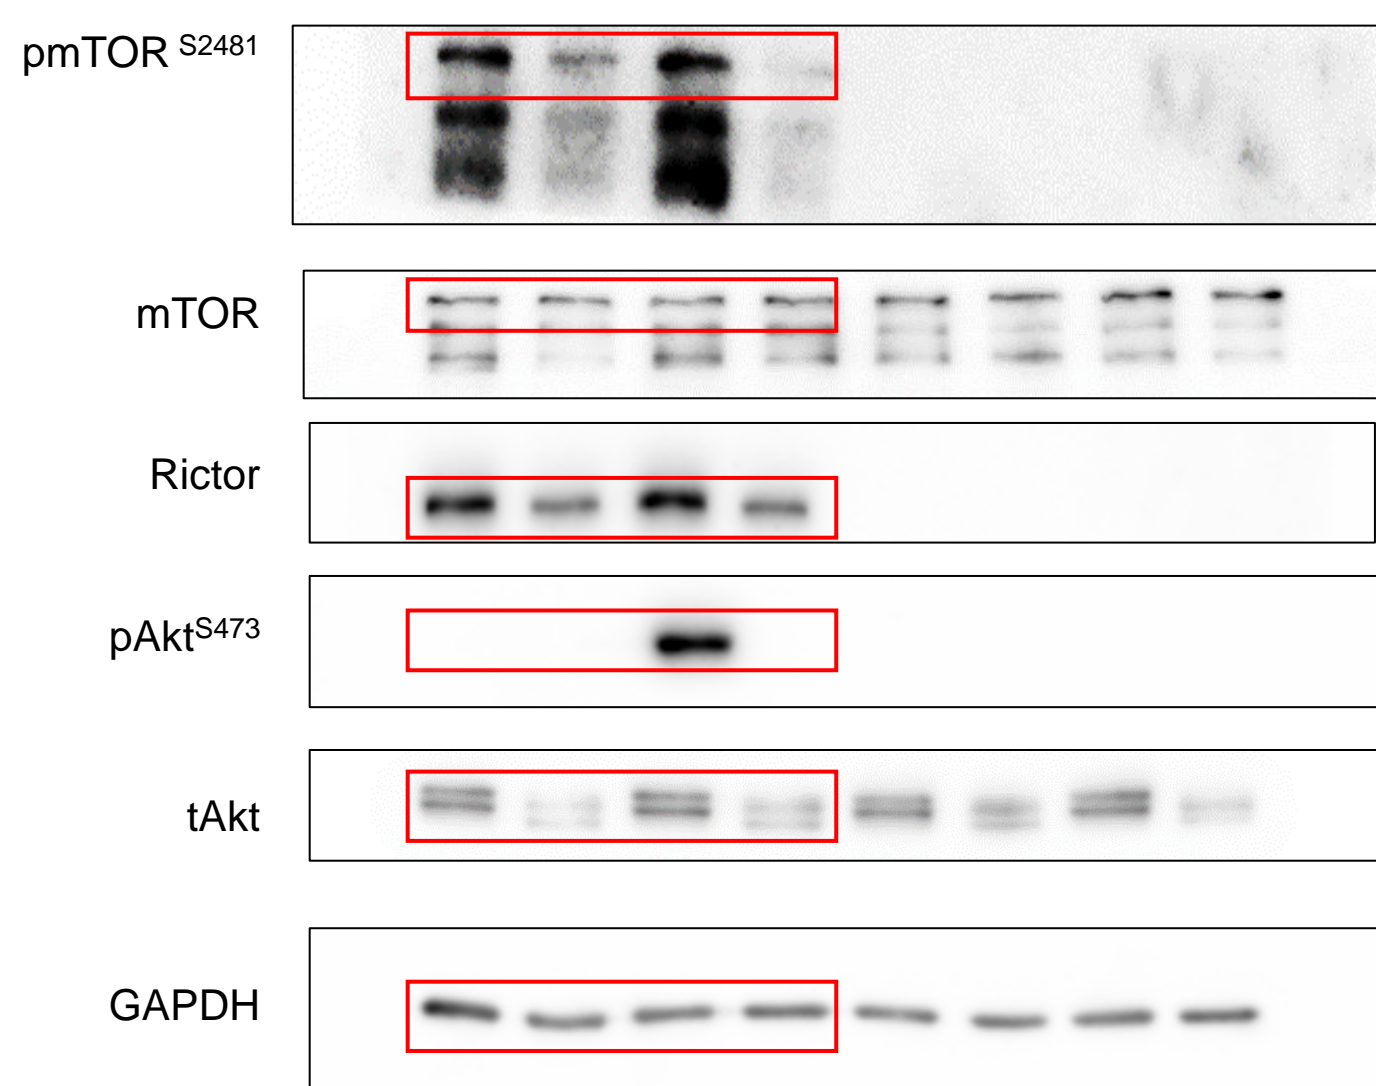

Full unedited gels for Figure 2J

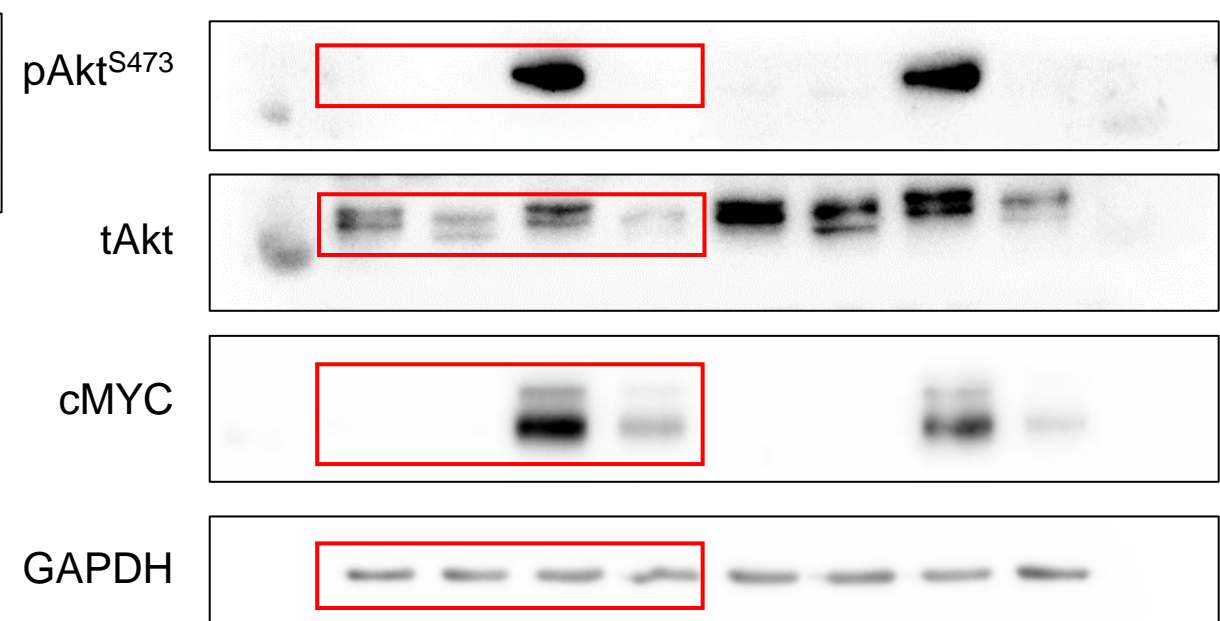

Full unedited gels for Figure 3A

CLL No. 45

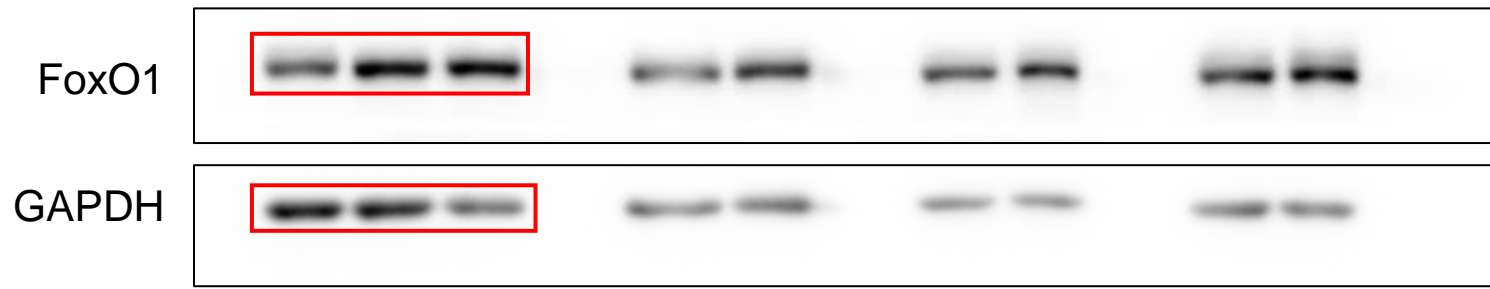

CLL No. 26

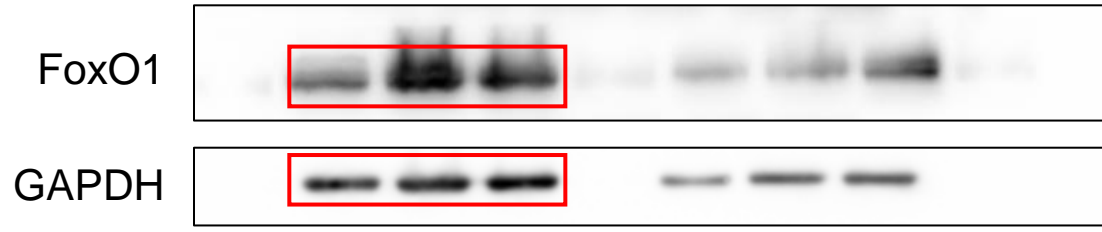

CLL No. 15

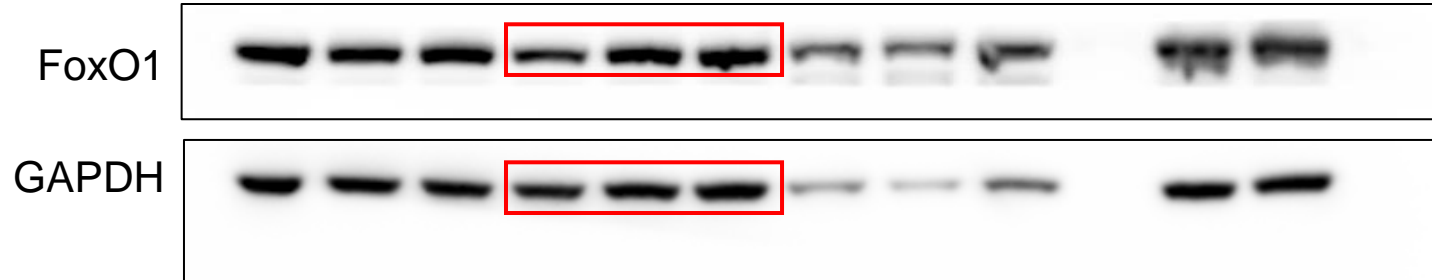

Full unedited gels for Figure 3C

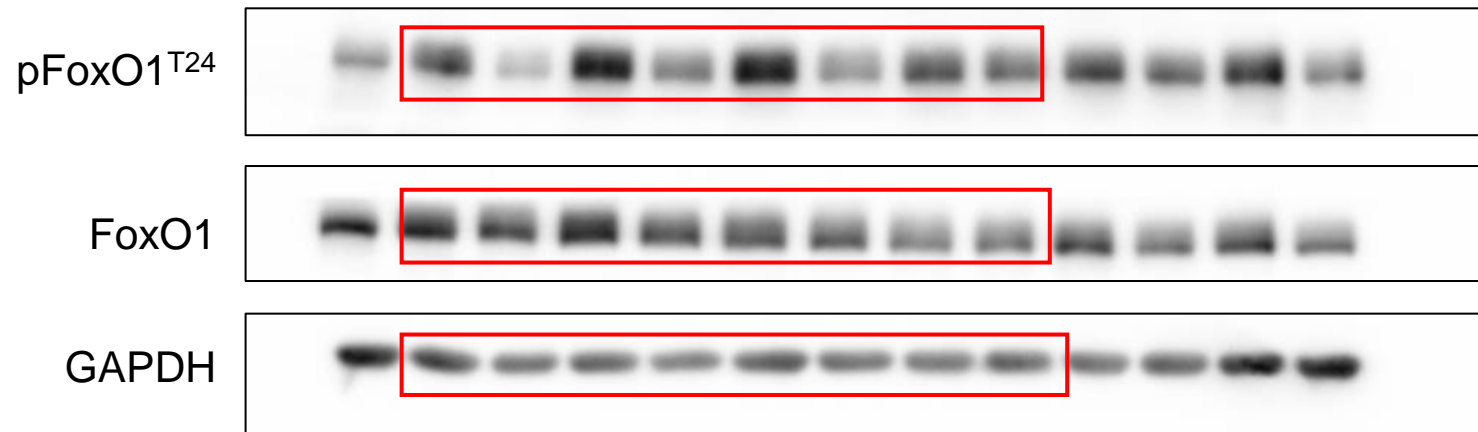

Full unedited gels for Figure 4A

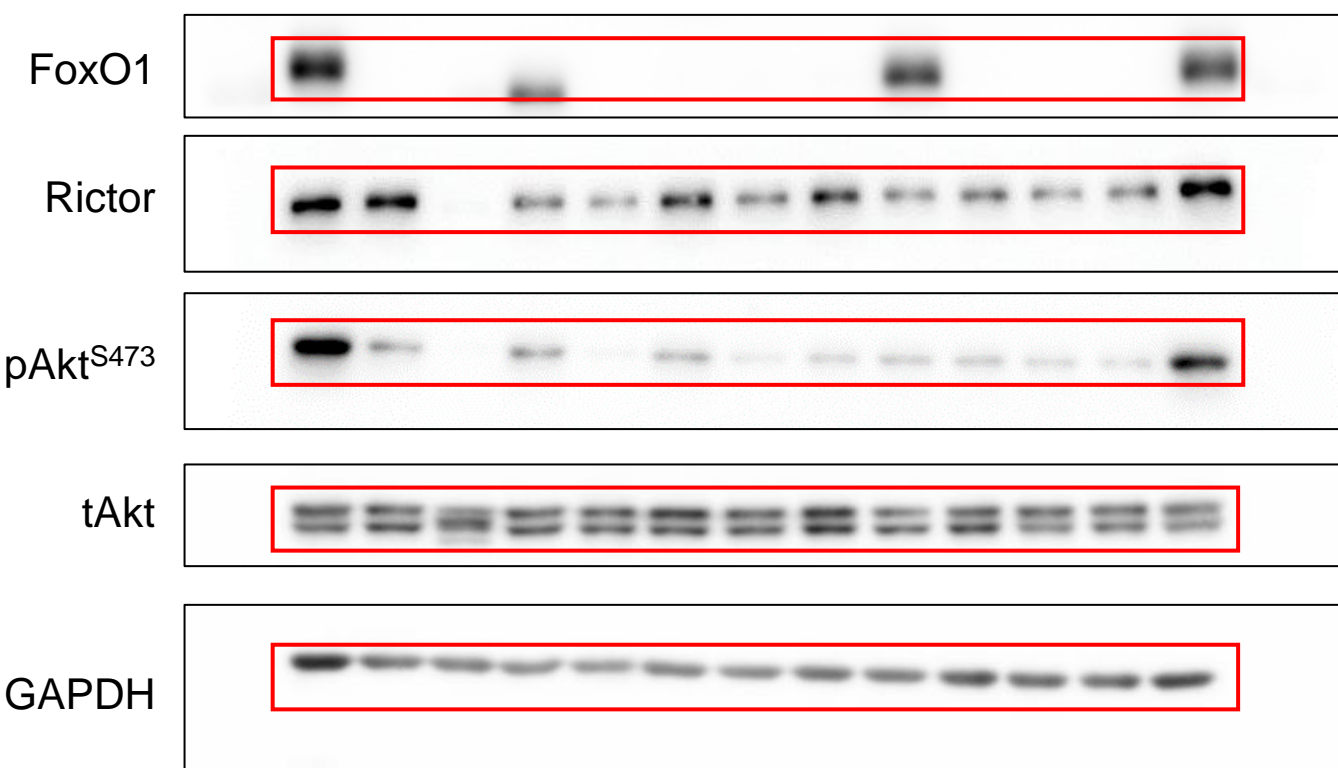

Full unedited gels for Figure 4B

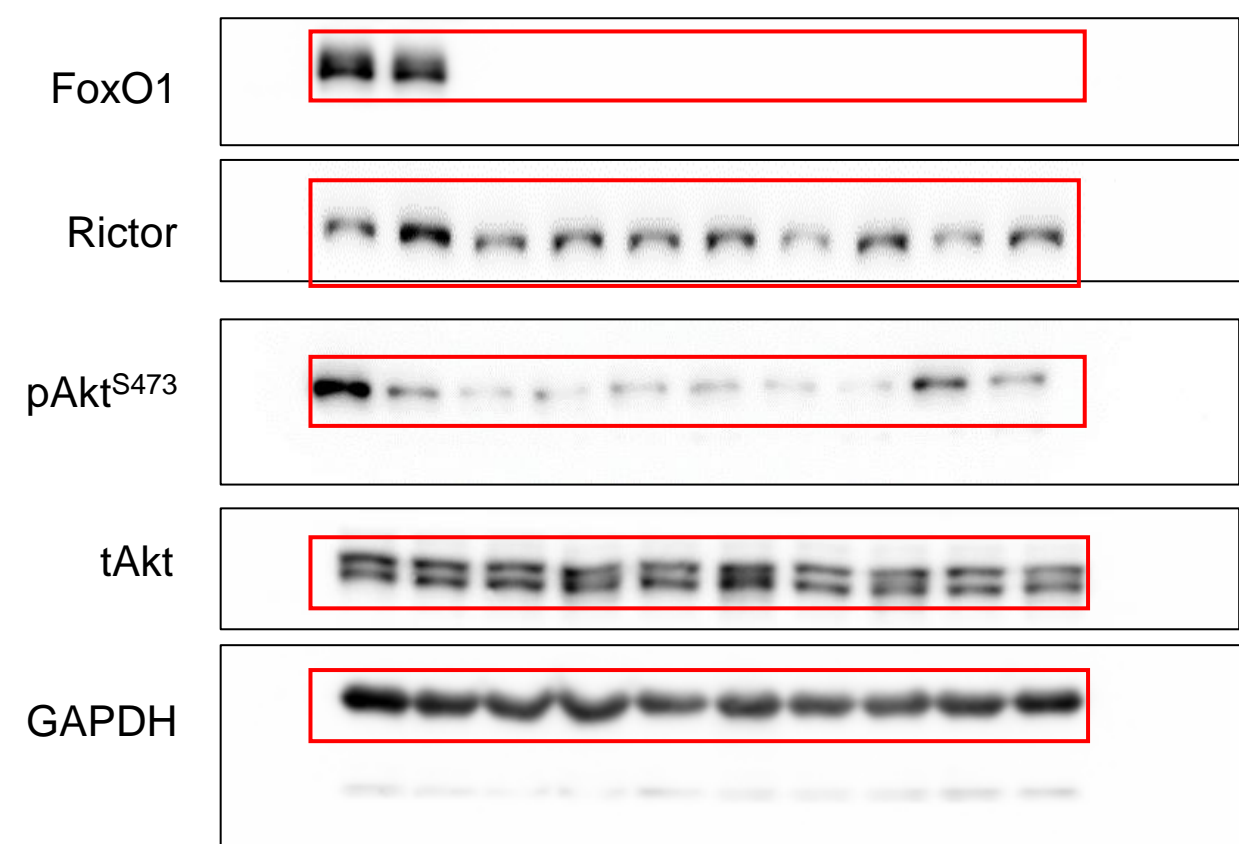

Full unedited gels for Figure 4D

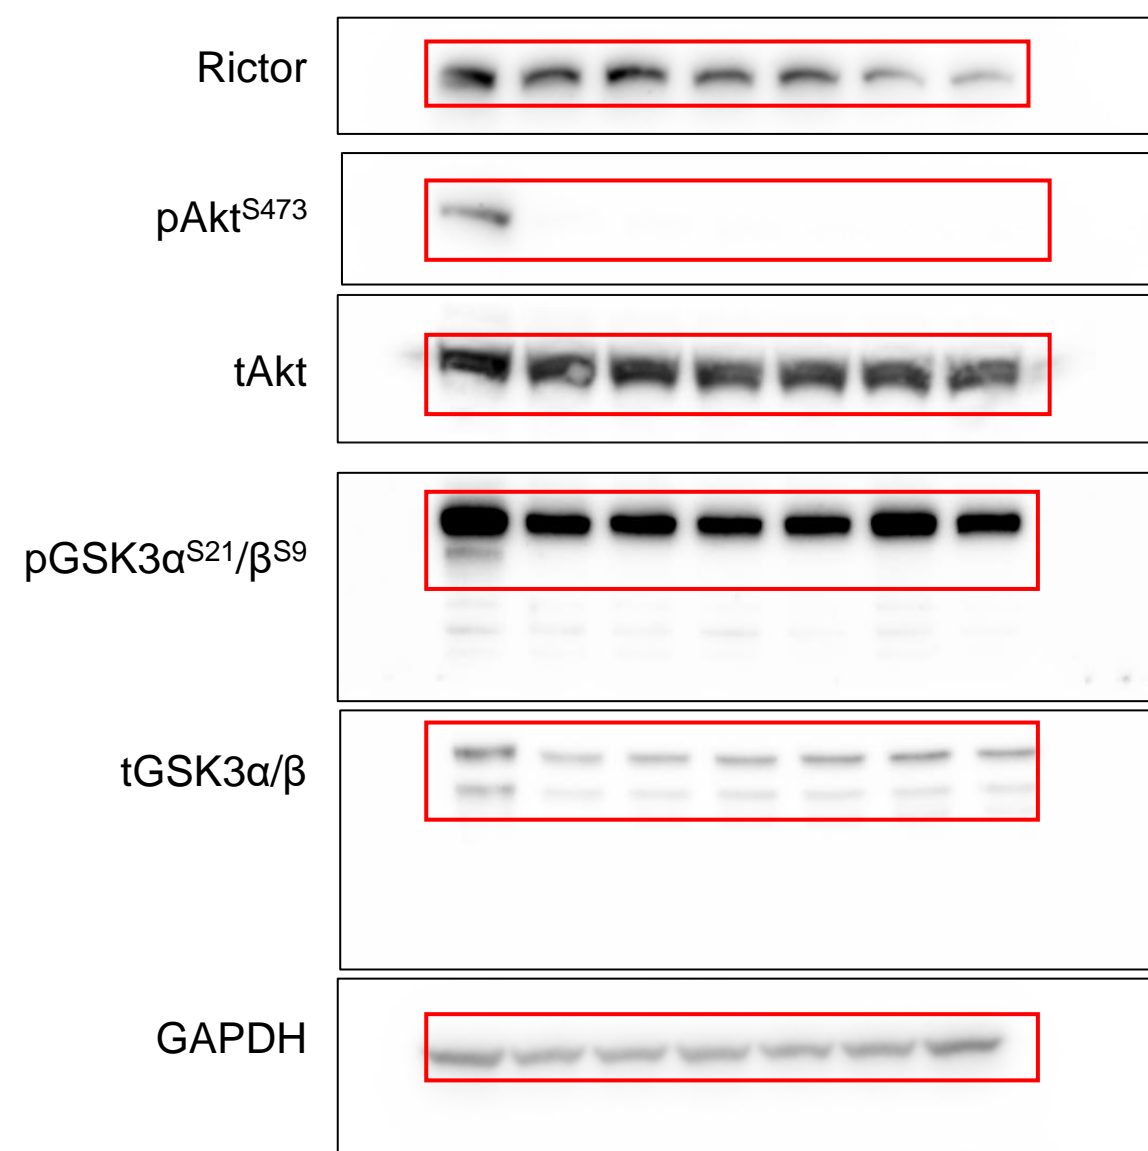

Full unedited gels for Figure 4E

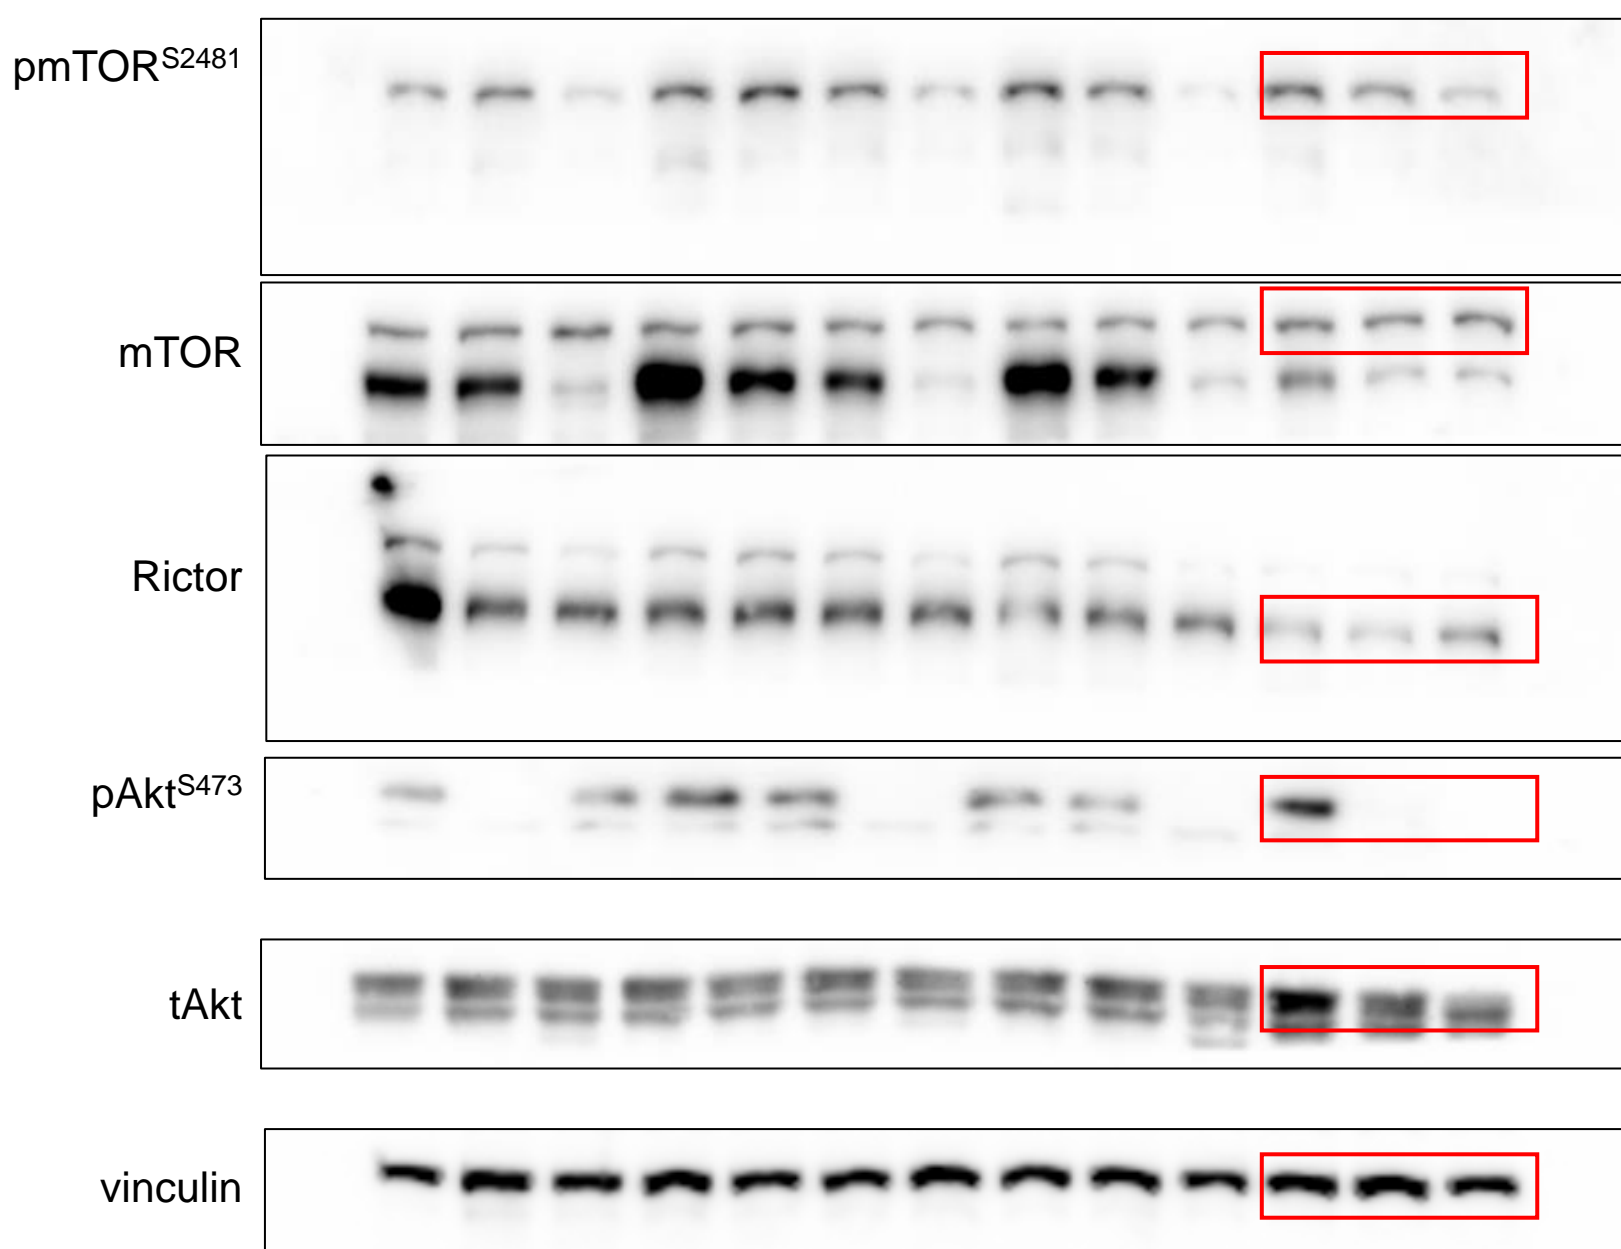





Full unedited gels for Figure 5B

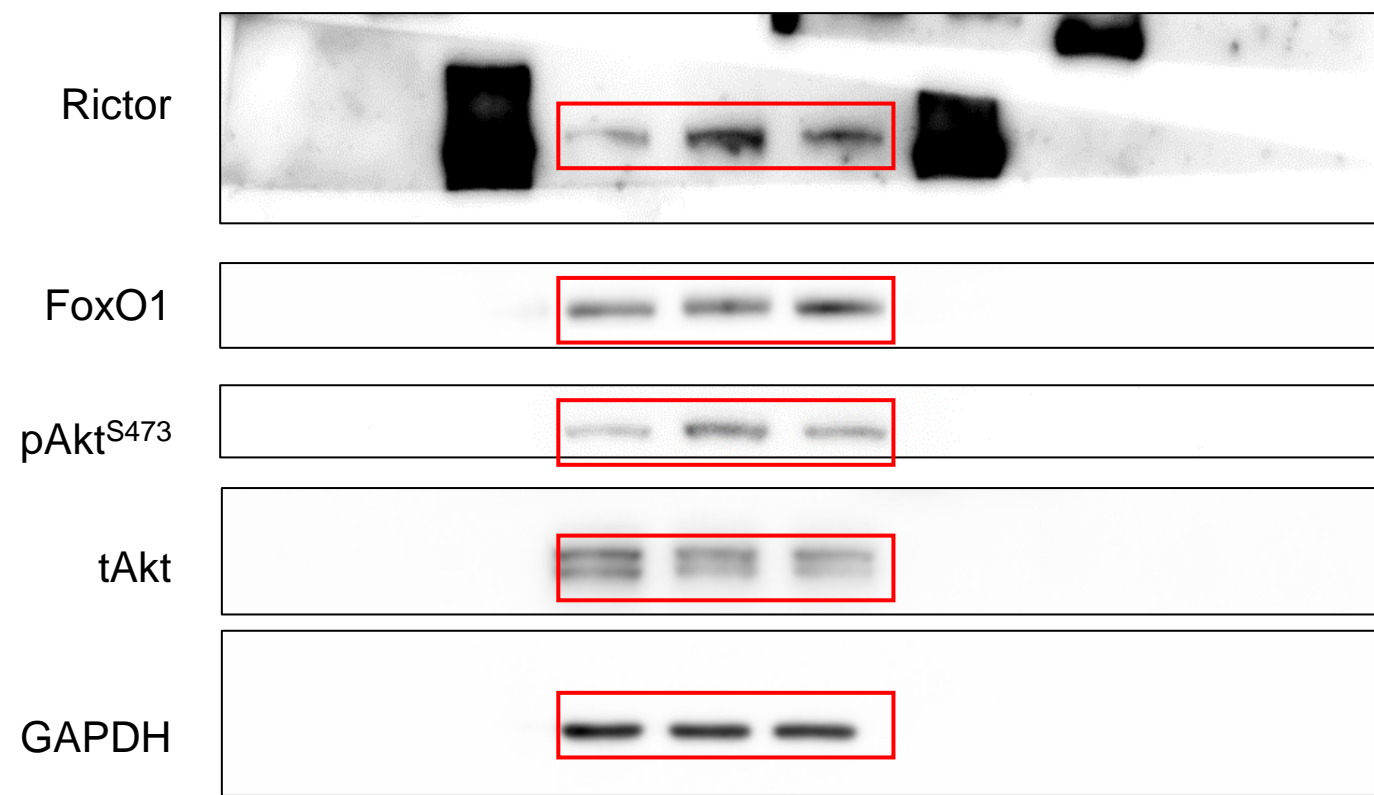



Full unedited gels for Figure 6A

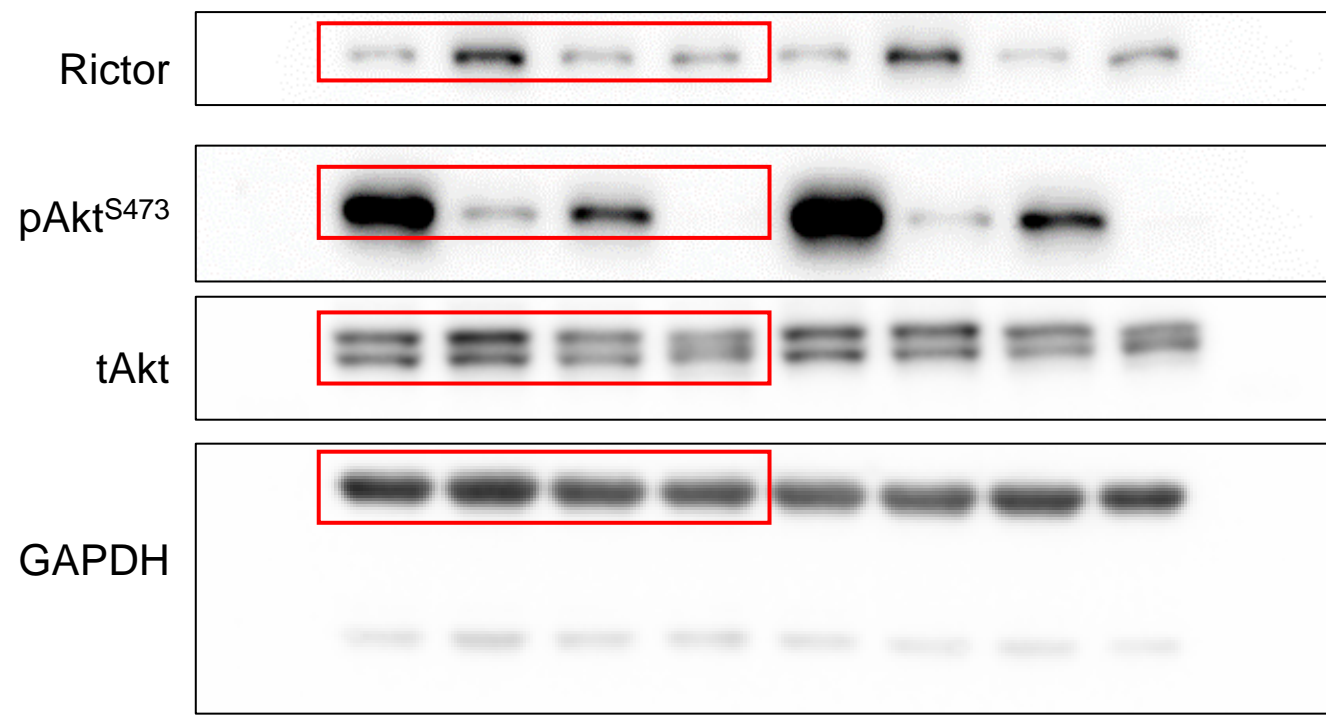

Full unedited gels for Figure 6C

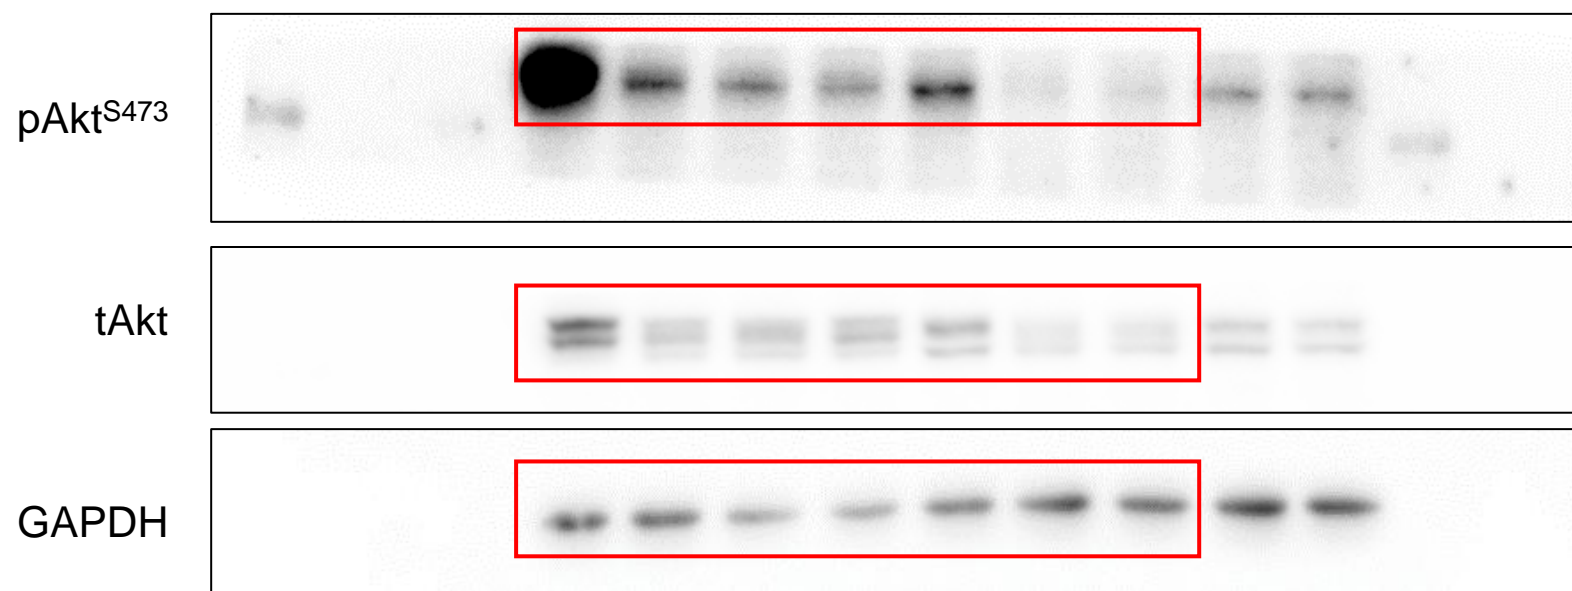

Full unedited gels for Supplemental Figure 3

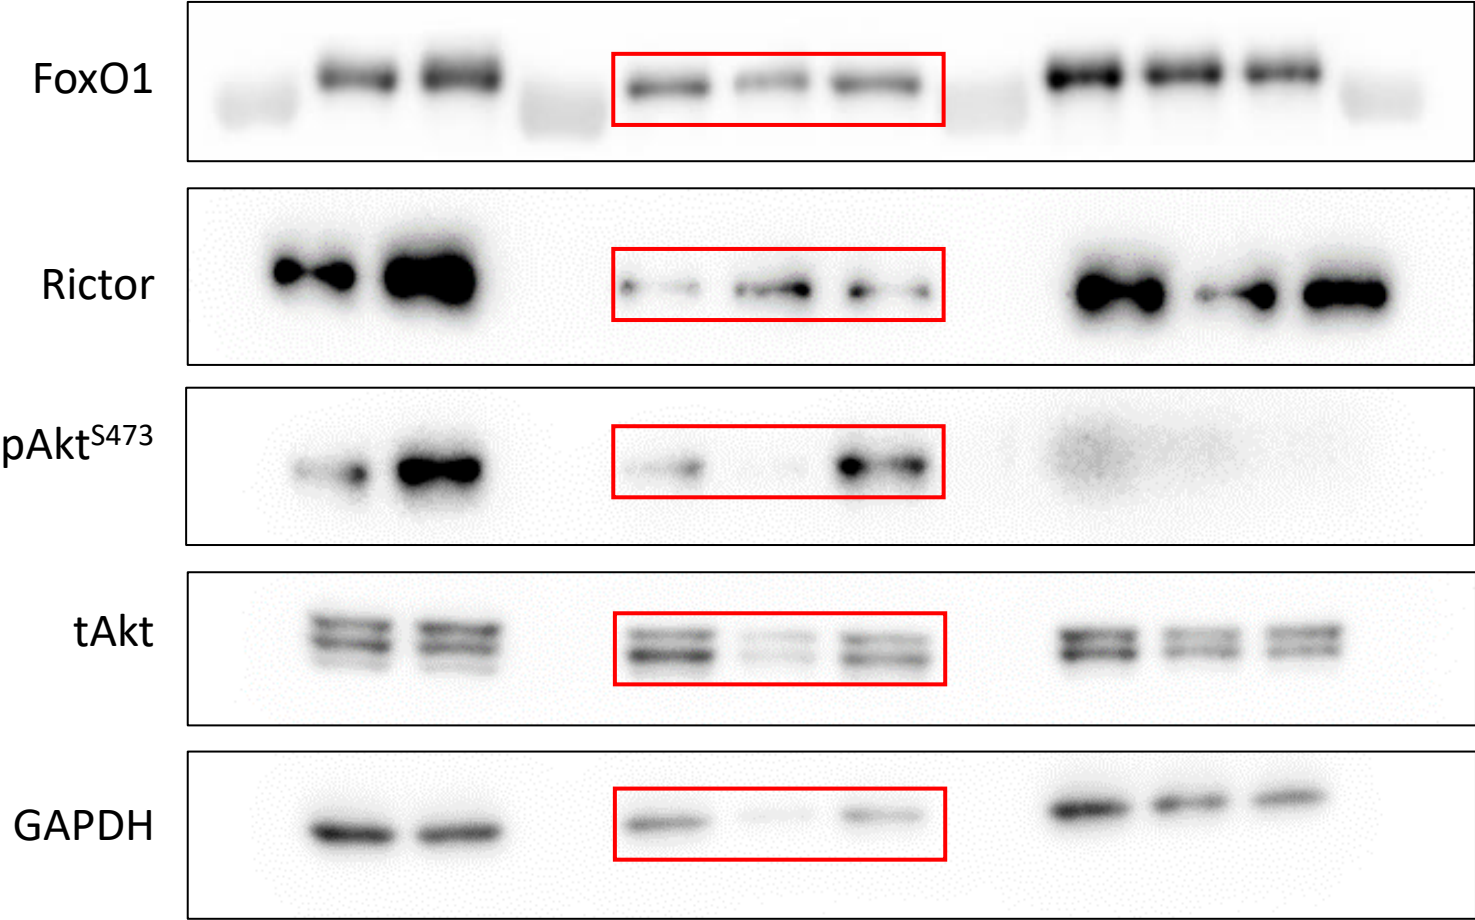

CLL No. 110

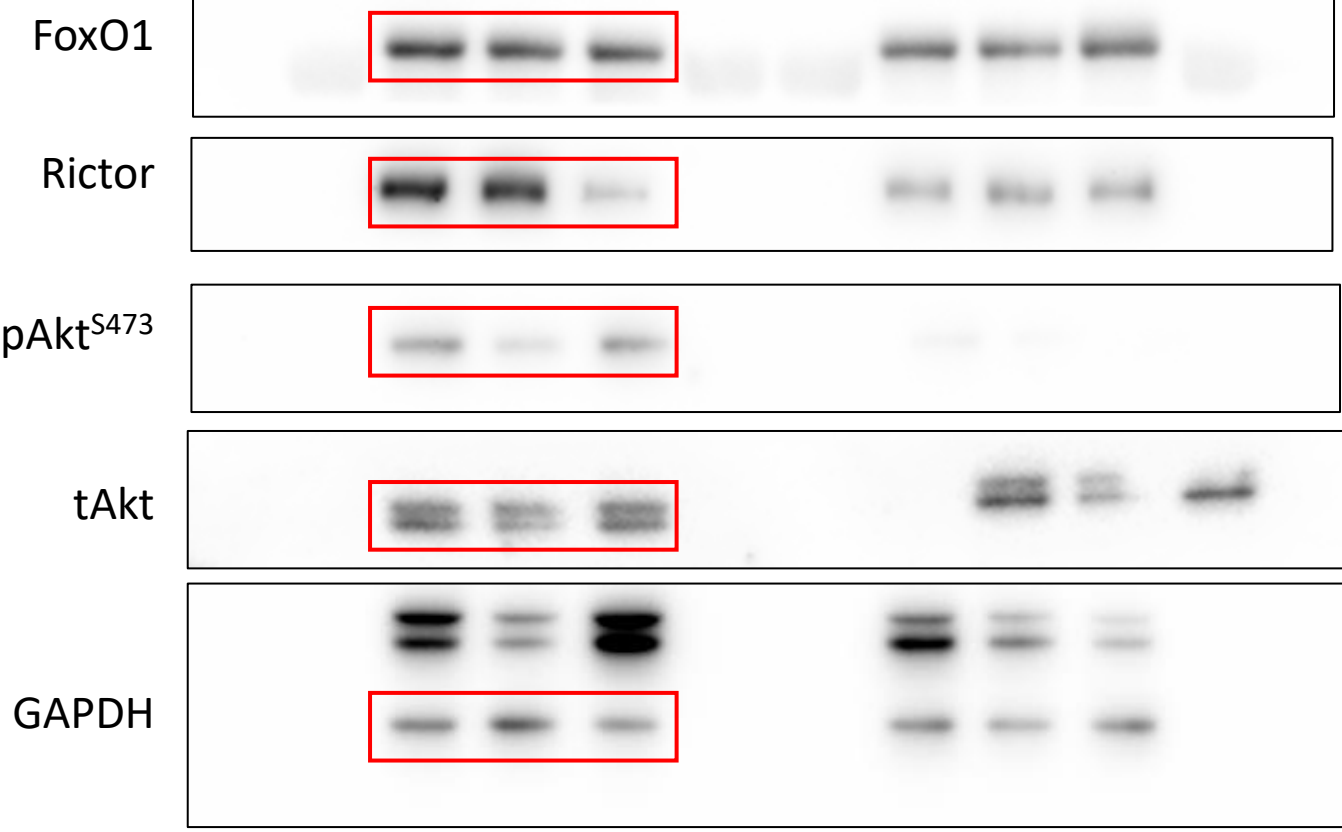

CLL No. 111

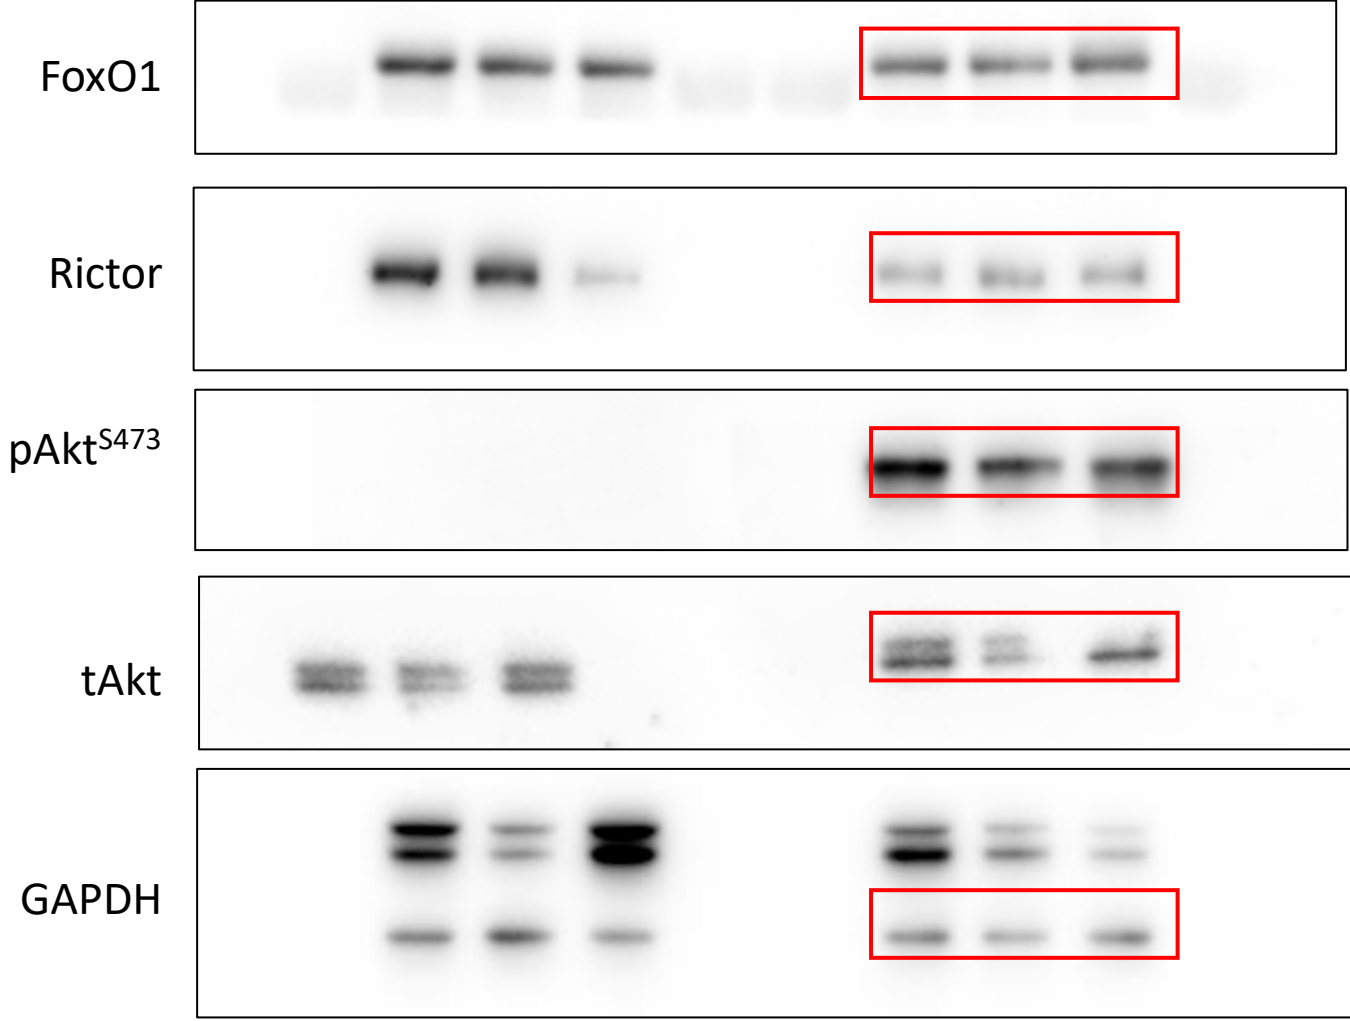

CLL No. 112

Full unedited gels for Supplemental Figure 6A

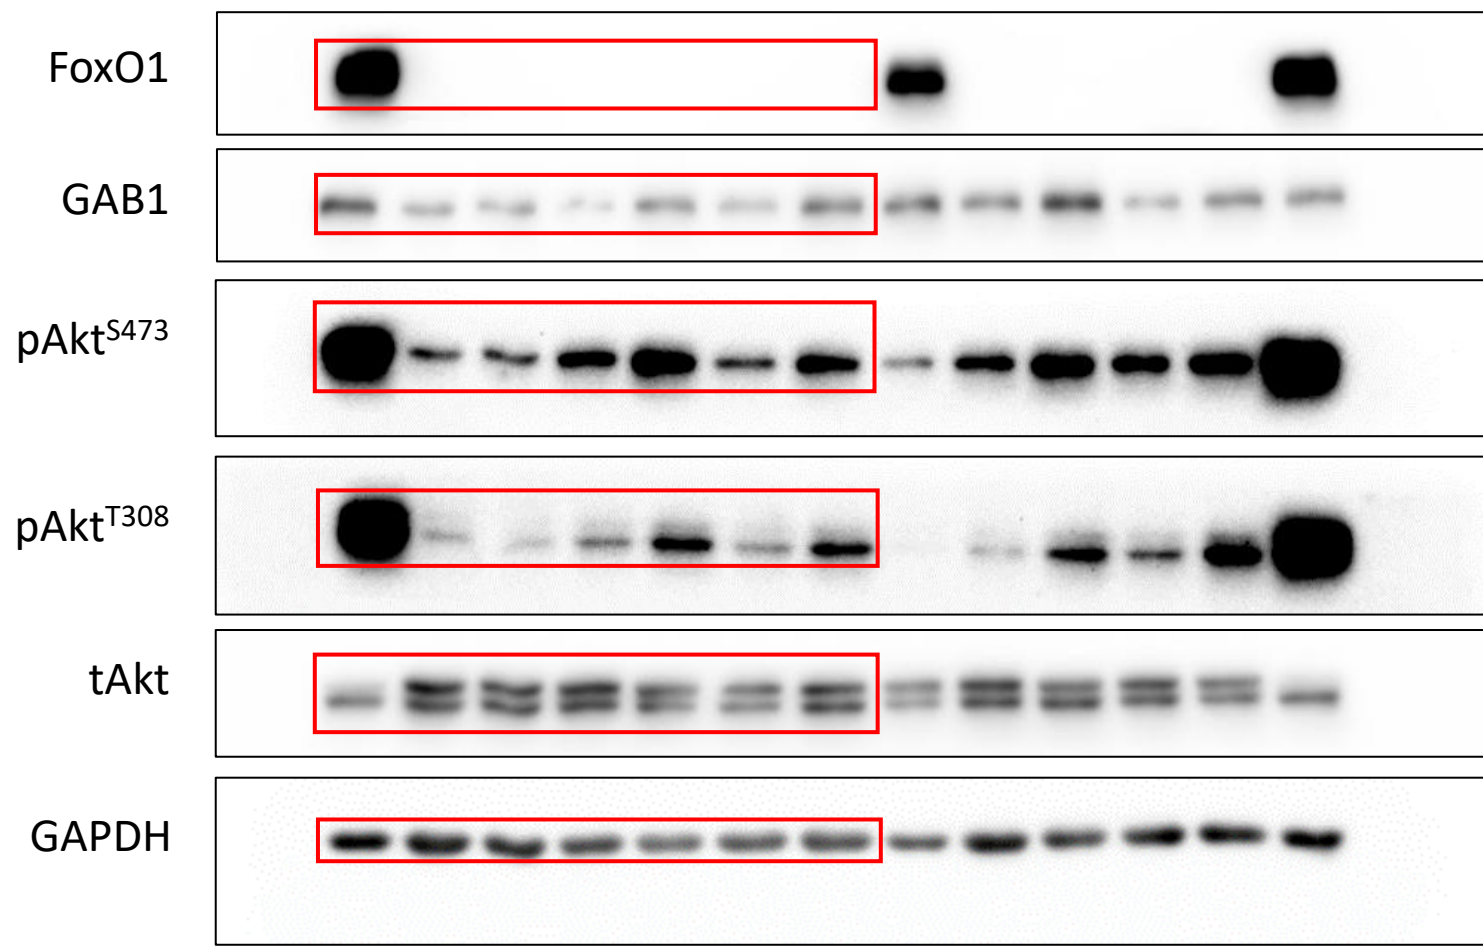

Full unedited gels for Supplemental Figure 6B

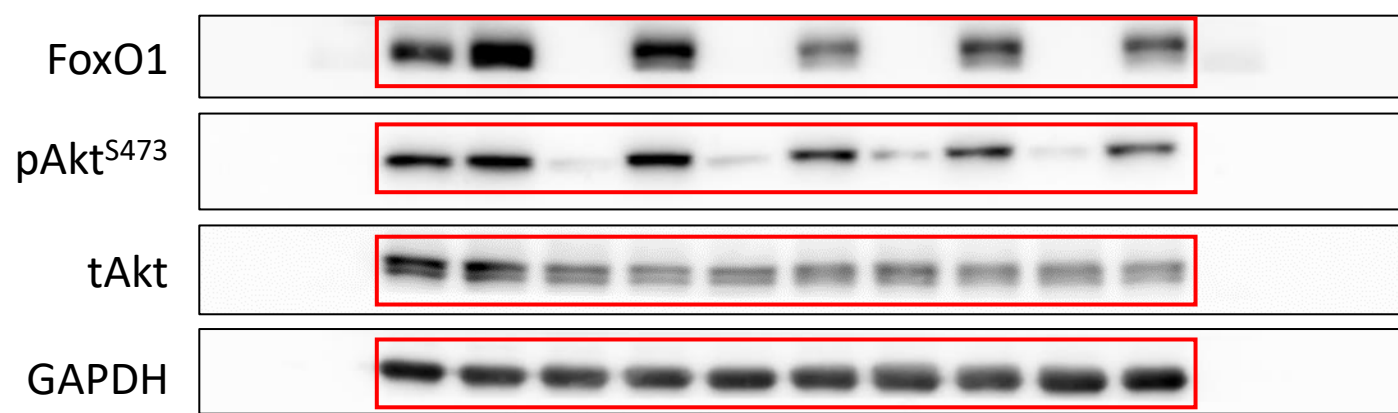

Full unedited gels for Supplemental Figure 6C

cl. 16

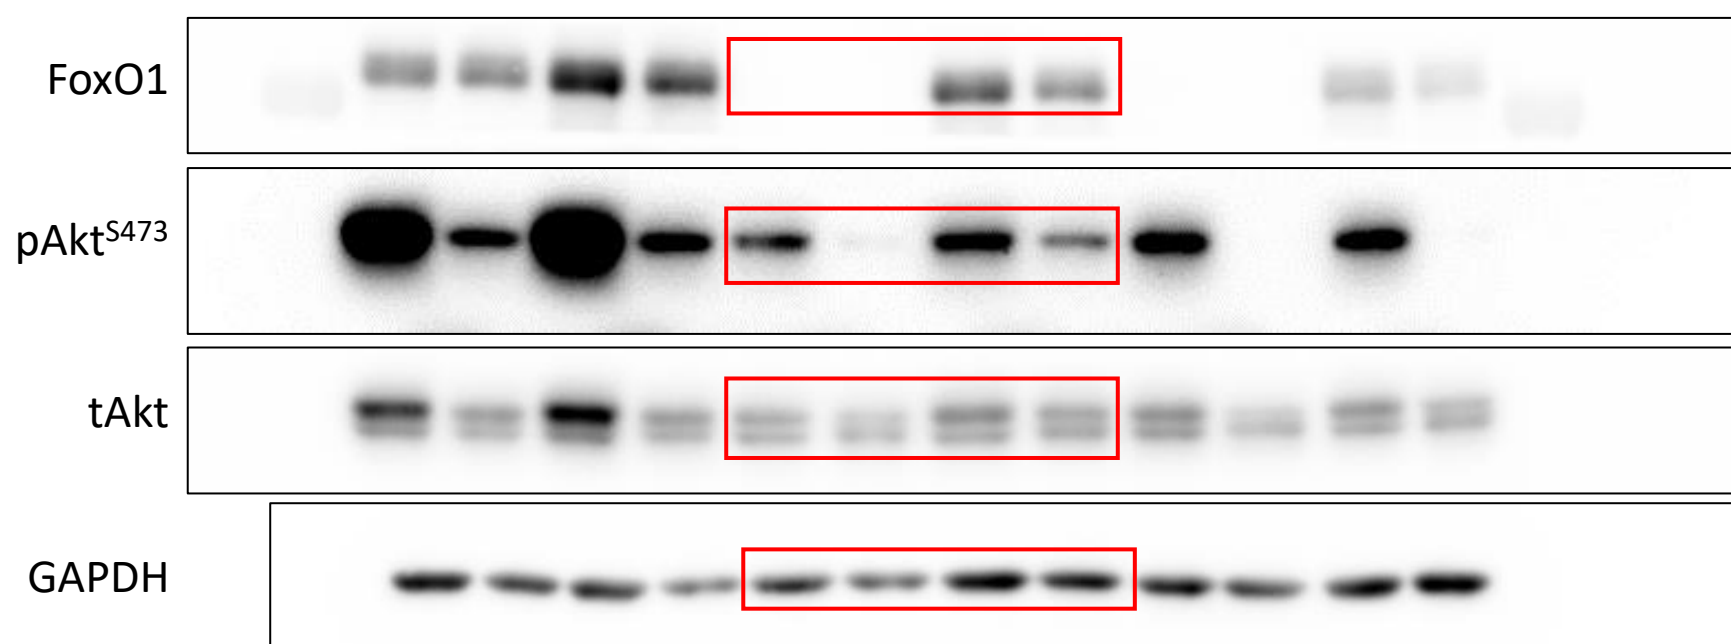

cl. 31

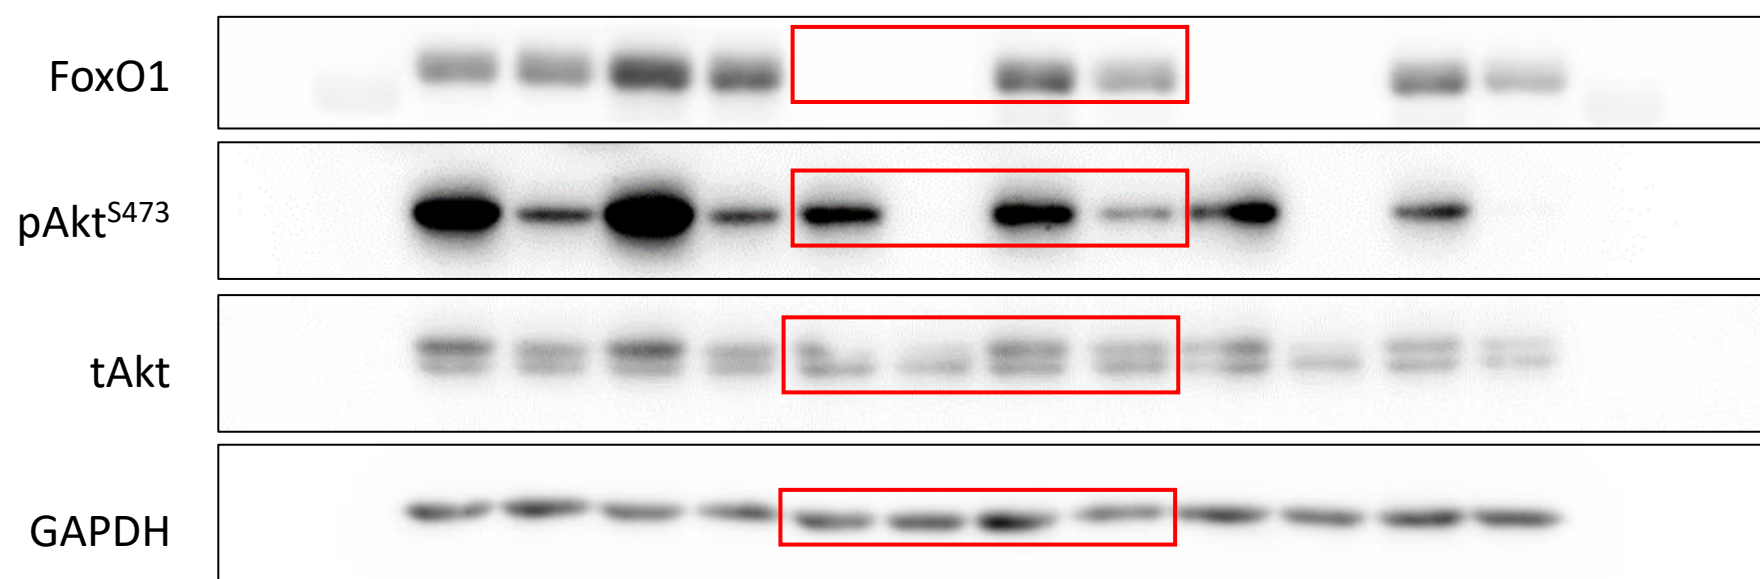



Full unedited gels for Supplemental Figure 7Bi

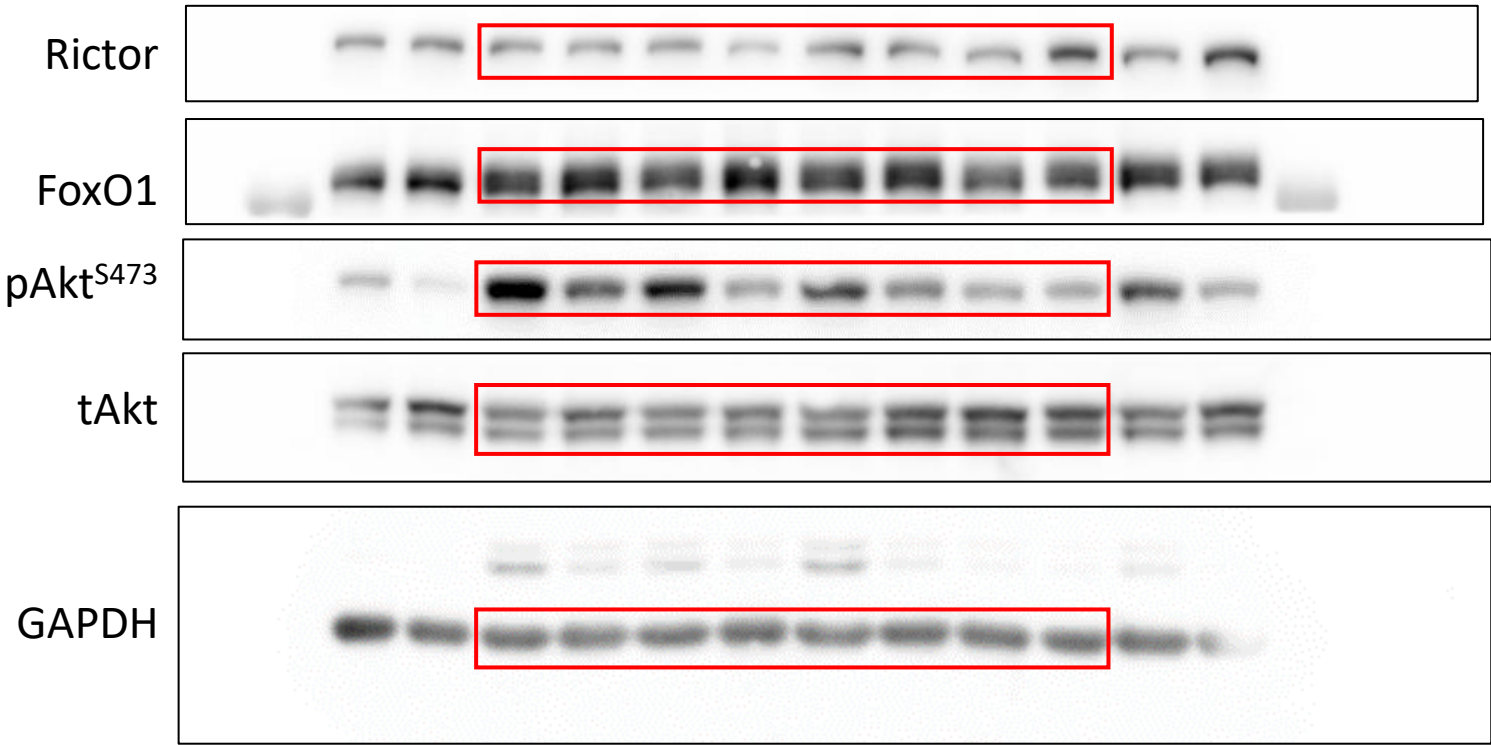

Full unedited gels for Supplemental Figure 7Bii

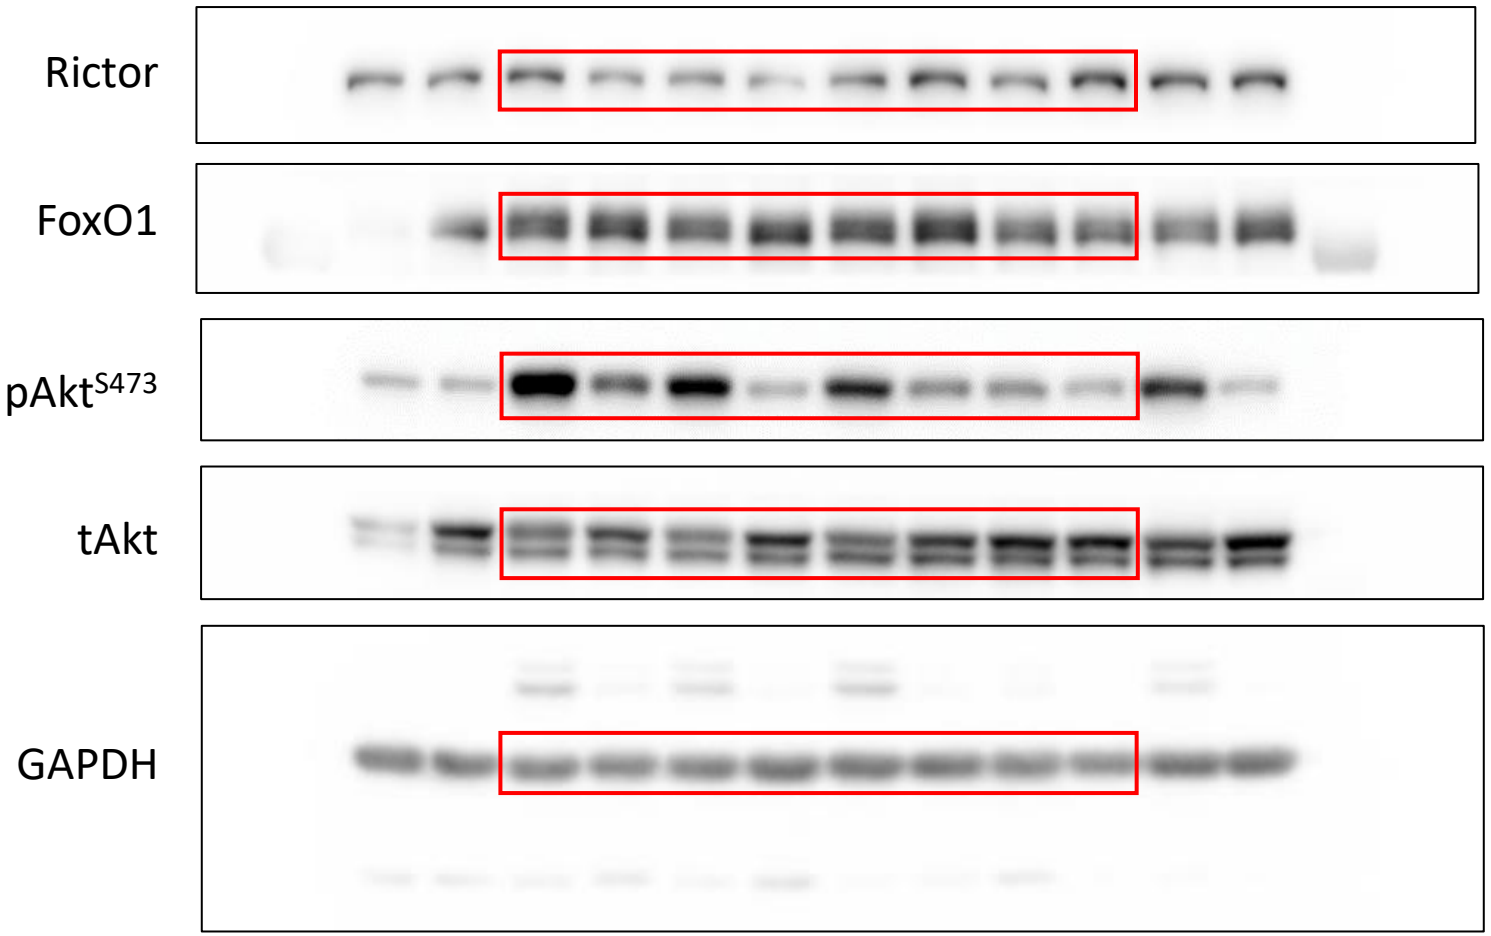

Full unedited gels for Supplemental Figure 7C

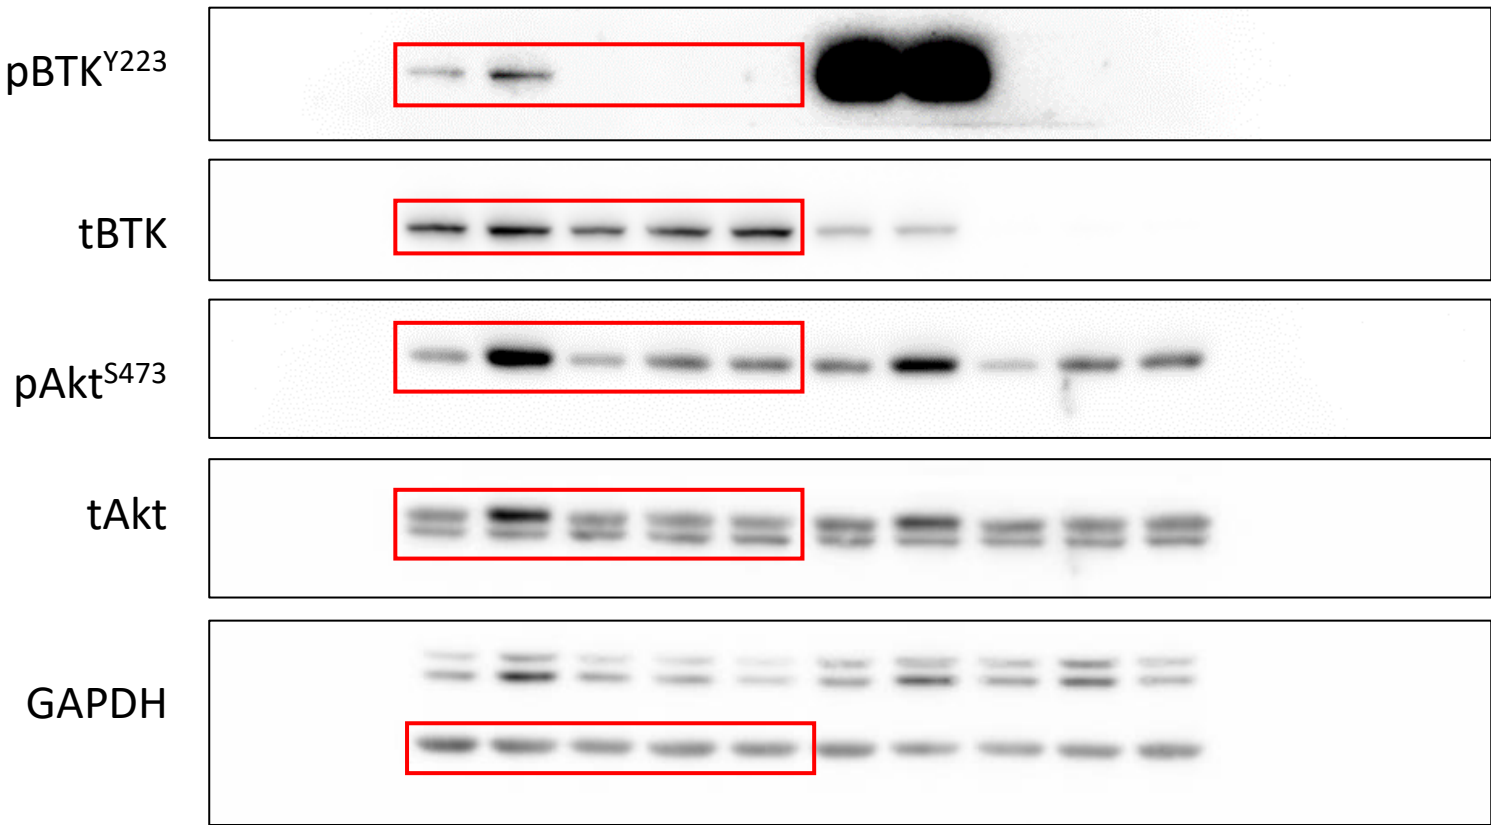

Full unedited gels for Supplemental Figure 9B

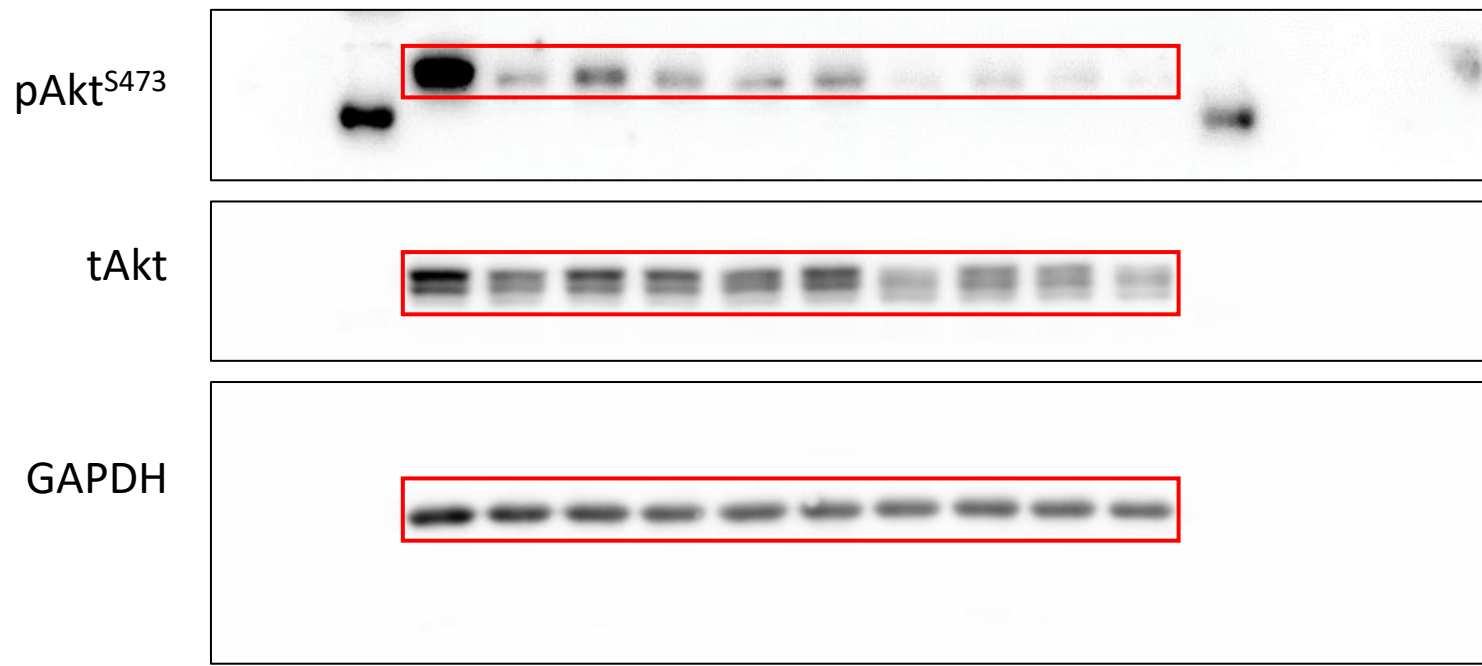

CLL No. 109

Full unedited gels for Supplemental Figure 12

Day 1

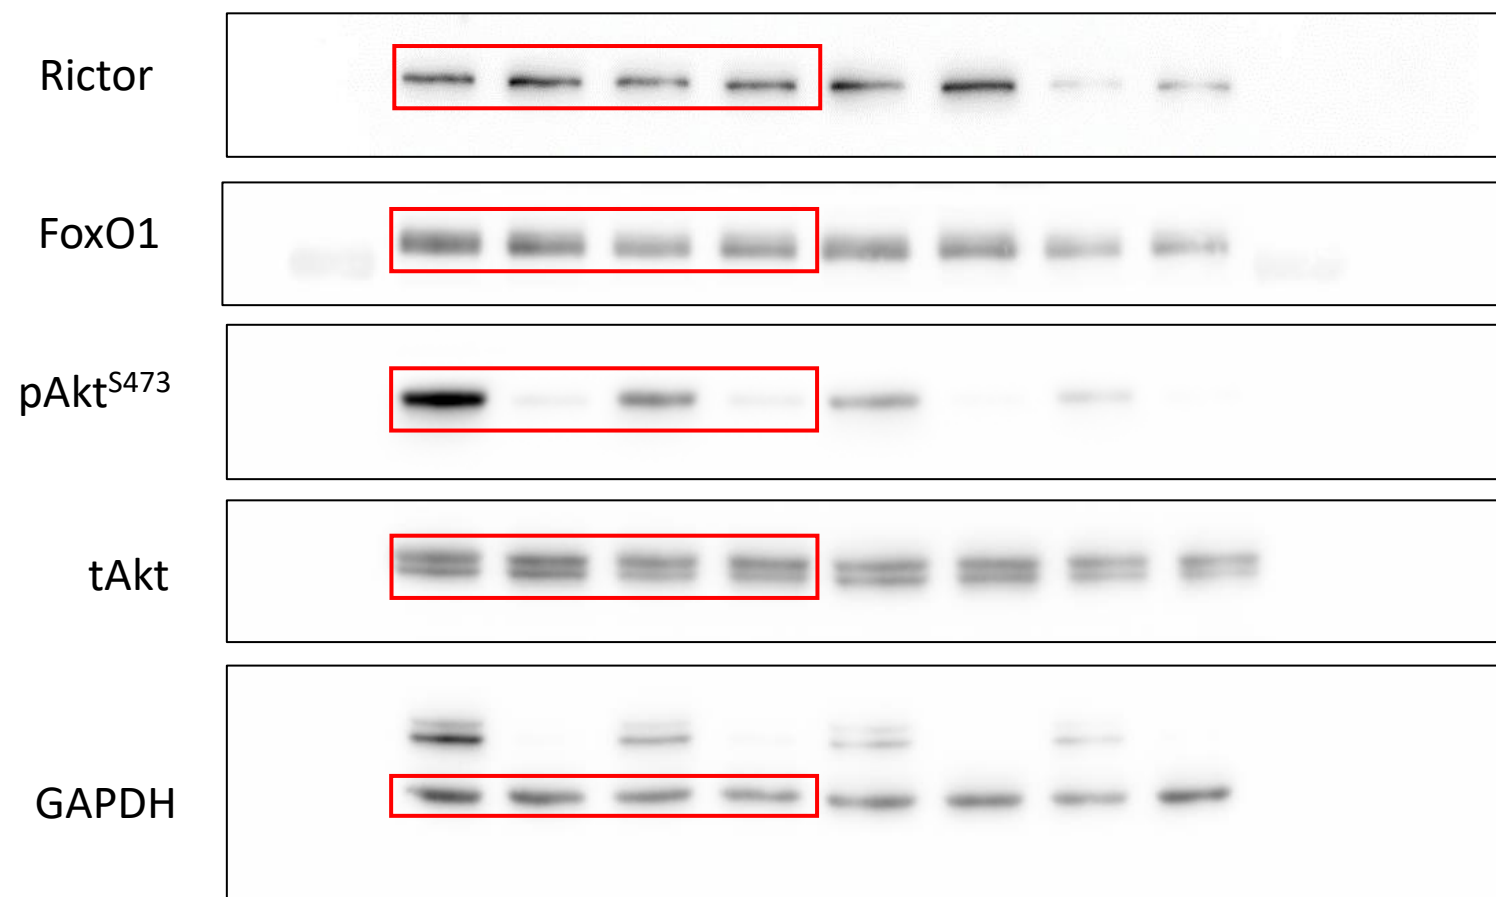

Day 5

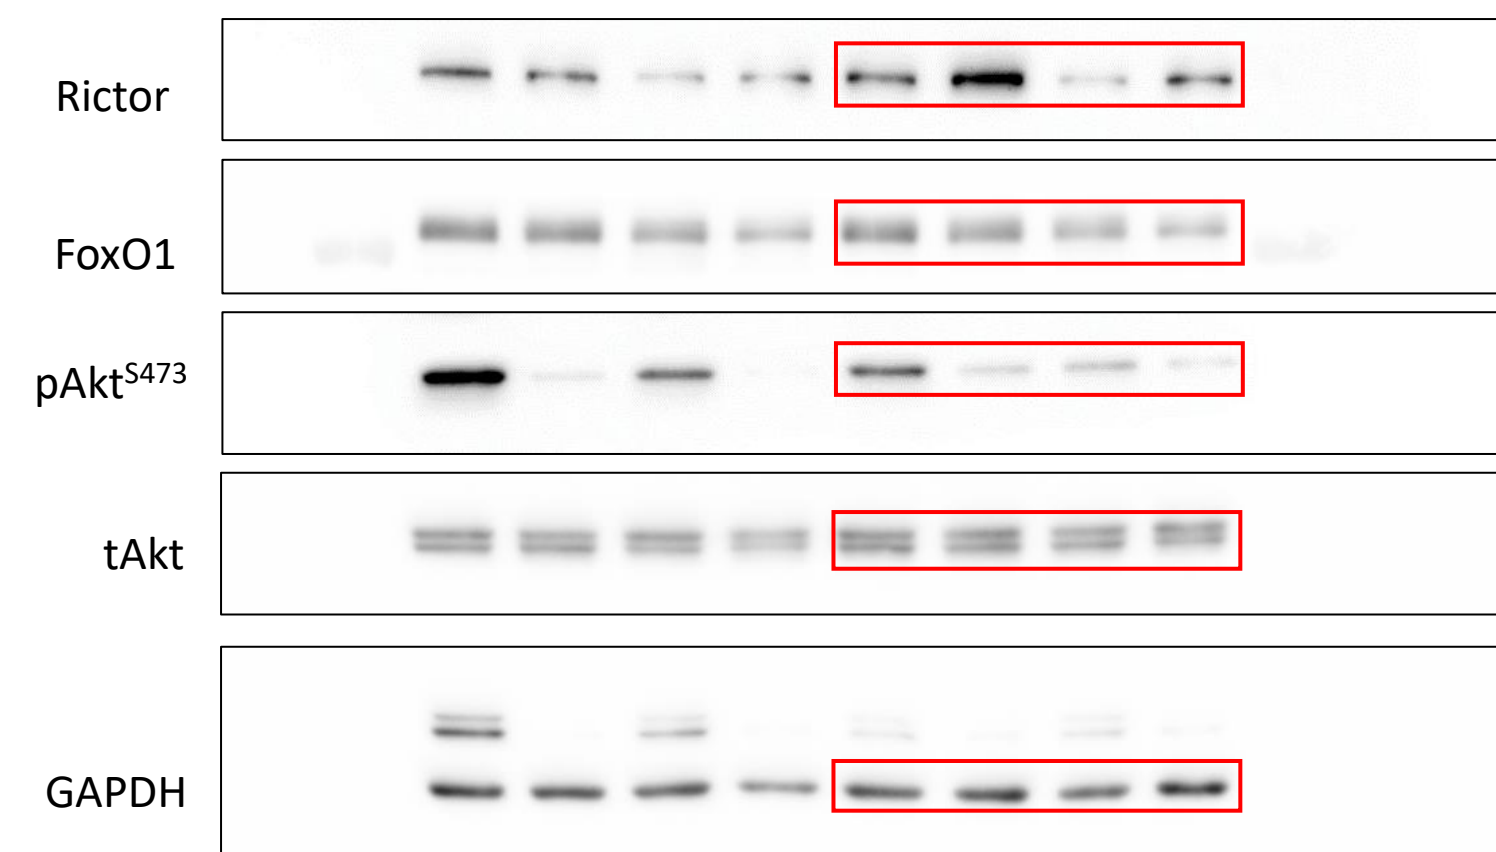

Full unedited gels for Supplemental Figure 13

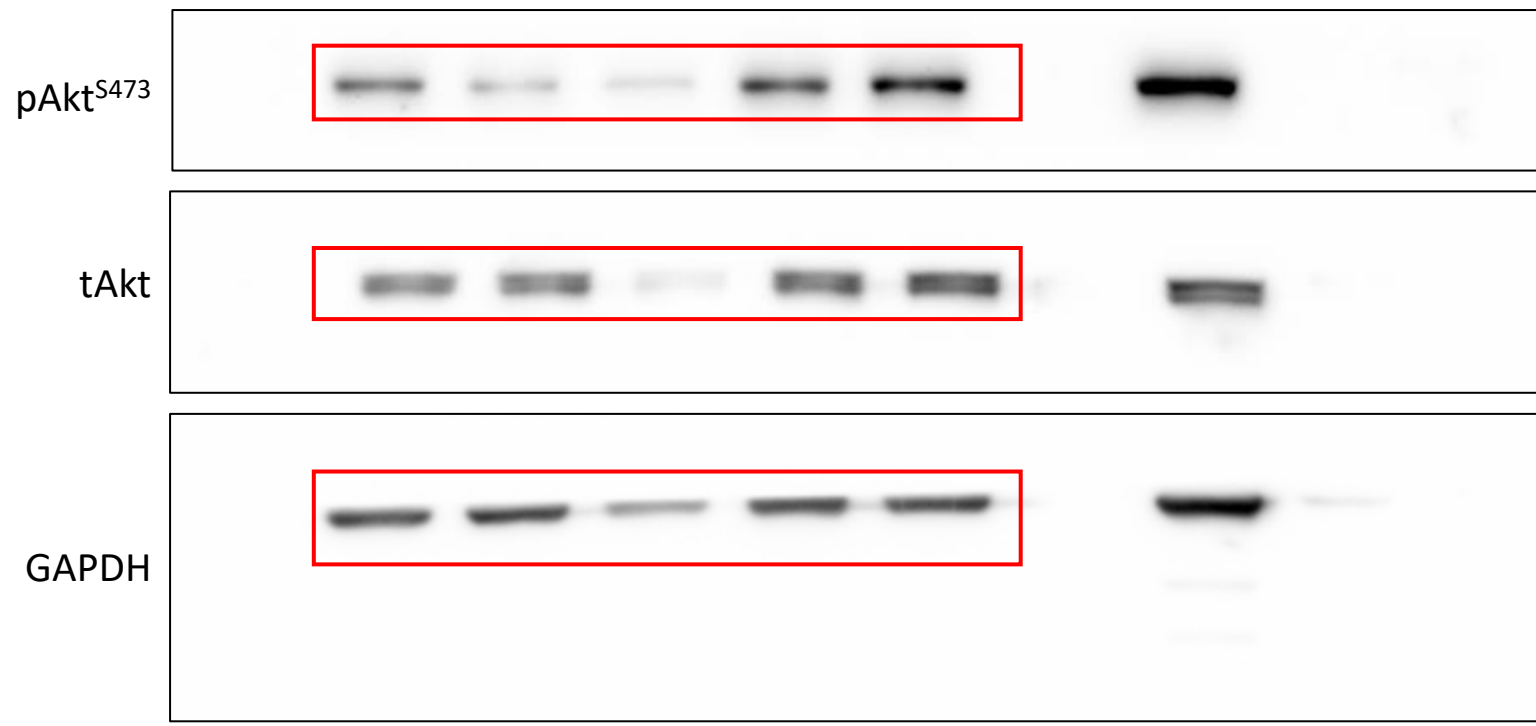

Supplement: jci-134-173770-s149.pdf [file jci-134-173770-s149.pdf]
