# Supplementary material for: FoxO1/Rictor axis induces a nongenetic adaptation to ibrutinib via Akt activation in chronic lymphocytic leukemia
Source: PubMed Central journal article supplement (PMC11601945; doi:10.1172/jci173770), 2024-10-22
Supplement: jci-134-173770-s148.pdf [file jci-134-173770-s148.pdf]

## **Supplemental Materials**

*Ondrisova et al.*

### Correspondence:

Marek Mraz, M.D., Ph.D.  
Associate Professor of Oncology  
Central European Institute of Technology, Masaryk University  
Kamenice 5, 625 00 Brno, Czech Republic  
E-mail: marek.mraz@email.cz  
Tel.: +420 549498143

### **1) Supplemental Methods**

### **2) Supplemental Figures: 14**

### **3) Supplemental Tables: 8**

### **1) Supplemental Methods**

#### **CLL samples and cell lines**

Primary CLL samples were collected with written informed consent according to the Declaration of Helsinki, and the Institutional Review Board approved the study. Peripheral blood samples were obtained from patients who did not receive any therapy for at least six months (except the ibrutinib/idelalisib treated patients). The samples from ibrutinib/acalabrutinib/idelalisib-treated patients were collected prior to the drug administration and during therapy at the time points indicated in the figure legend and supplemental Table 8. Primary CLL samples were purified by negative selection with RosetteSep Human B Cell Enrichment Cocktail (Stemcell Technologies) and RosetteSep Human CD3 Depletion Cocktail (Stemcell Technologies) and Ficoll-Paque PLUS (Sigma Aldrich) according to manufacturer's protocol. In some cases of ibrutinib or idelalisib treated patients, PBMCs were isolated by density gradient centrifugation (CLL 1-12) as described previously (1) or isolated and subsequently purified by magnetic separation using anti-CD3 MicroBeads (Miltenyi Biotec) (CLL 19-23; 60-65; 110-112) as described previously (2). Final purity was  $\geq 95\%$  of CD5+19+ cells in all cases (evaluated by flow cytometry). Purified primary CLL cells were cultivated in RPMI-1640 (Sigma-Aldrich) supplemented with 20% fetal bovine serum (Biosera) and  $100 \text{ U}\cdot\text{ml}^{-1}$  /  $100 \text{ }\mu\text{g}\cdot\text{ml}^{-1}$  of penicillin/streptomycin (Sigma Aldrich) and in 5%  $\text{CO}_2$  at 37 °C. *BTK* and *PLCG2* mutations in BTK inhibitor-resistant patients were detected as described previously (3).

## Cell culture

MEC1 cell line was obtained from the German Collection of Microorganisms and Cell Cultures (DSMZ) and was cultivated in Iscove's Modified Dulbecco's Medium (IMDM, Biosera) supplemented with 10% fetal bovine serum (Biosera) and 100 U·ml<sup>-1</sup> / 100 µg·ml<sup>-1</sup> penicillin/streptomycin (Sigma Aldrich) and further cultivated in 5% CO<sub>2</sub> at 37°C. HS5 and HEK293T cell lines were obtained from American Type Culture Collection (ATCC) and both were cultured in Dulbecco's Modified Eagle's Medium (DMEM, Biosera) supplemented with 10% fetal bovine serum (Biosera) and 100 U·ml<sup>-1</sup> / 100 µg·ml<sup>-1</sup> penicillin/streptomycin (Sigma Aldrich) in 5% CO<sub>2</sub> at 37°C. For co-culturing CLL cells, HS5<sup>wild-type</sup> or HS5<sup>CD40L,IL-4,IL-21</sup> cells were γ-irradiated (20 Gy), seeded 5×10<sup>4</sup> cells / cm<sup>2</sup> into 0.1% gelatin coated plates or dishes (TPP) and kept at 37 °C with 5 % CO<sub>2</sub> in DMEM media for 24 hrs. On the following day CLL cells were added in a 20:1 ratio (CLL:HS5) in suitable amount of RPMI media containing RPMI-1640 (Biosera) supplemented with 20% fetal bovine serum (Biosera), 100 U·ml<sup>-1</sup>/100 µg·ml<sup>-1</sup> penicillin/streptomycin (Sigma Aldrich), 2 mM L-Glutamine (Biosera) and 70 nM 2-β-mercaptoethanol (Sigma Aldrich).

## Plasmid constructs and genome editing

The gRNA sequences targeting the *Rictor* and *FoxO1* gene were designed in Benchling (Biology Software, 2019) online tool. The sequence 5'-CACCGTTACCTCGGGTCAGATCCAG-3' for Rictor-gRNA or 5'-CACCGGGGCTGTGCGGGGACTTCCA-3' for FoxO1-gRNA was cloned into pSpCas9(BB)-2A-GFP vector (#48138, Addgene). To obtain *Rictor* or *FoxO1* knock-outs, the MEC1 wild-type cells were electroporated (Neon Transfection System, Thermo Fisher Scientific; 1500 V / 20 ms / 2 pulses) with prepared plasmids. After 48 hrs viable cells were sorted for GFP-positivity, expanded, sorted for single cells, expanded and individual clones were validated for absence of Rictor or FoxO1 on protein level.

To prepare HS5<sup>CD40L,IL-4,IL-21</sup>, cells were transduced with constructs containing the i) coding sequence (CDS) for human IL-4 and puromycin cloned into the pAIP lentiviral vector (Addgene plasmid #74169), ii) CDS for human CD40L and blasticidin resistance cloned into the pEZ-Lv197 lentiviral vector (Genecopoeia/THP medical products, #EX-G0117-Lv197), and iii) CDS for human IL-21 cloned into pBMN-IRES-LyT2 retroviral vector (gift from Dr. D. Hodson, University of Cambridge, Cambridge, United Kingdom). Constructs were propagated in Stbl3 E. coli (Invitrogen). For transducing HS5 cells, viral packaging plasmids δR8.91 or gag/pol (lentiviral or retroviral), VSV-G and L-GFP (gift from Dr. M. Smida, CEITEC MU, Brno, Czech Republic) were used as follows: 3538 ng δR8.91 or gag/pol, 462 ng VSV-G (envelope), 400 ng L-GFP (transfection efficacy) and 2 µg of a gene-of-interest construct was used to transfect each 6 cm<sup>2</sup> dish of HEK-293T cells, after mixing with 50 µl of Opti-MEM media (Gibco), 7 µl of DharmaFect Duo (Dharmacon) and 2 ml DMEM (Biosera). After 24 hrs cells were washed with fresh DMEM media. The virus supernatant was collected after 24, 36, 48 and 60 hrs and the media filtered through a 0.45 µm filter and 10 µg/ml of polybrene (Sigma Aldrich) was

directly put onto HS5 cells seeded in two 6 cm<sup>2</sup> Petri dishes (TPP). The media was replaced the next day and the selection with 10 µg/ml puromycin (Sigma Aldrich) or 10 µg/ml blasticidin (Gibco) was started 1-2 days later and lasted for up to one week. Cells were maintained at 37 °C with 5 % CO<sub>2</sub> in DMEM media with 10 % fetal bovine serum without antibiotics.

For in vitro growth assay MEC1<sup>wild-type</sup> and clones of MEC1<sup>FoxO1-KO</sup> cell lines were transduced by GFP or AZURIT encoding vectors (both obtained from Addgene; #36083 and #36086, respectively) as described above. Cells were subsequently sorted for GFP or AZURIT positive cells.

For transient FoxO1 overexpression, MEC1 *FoxO1* cells were electroporated (Neon Transfection System, Thermo Fisher Scientific; 1500 V / 20 ms / 2 pulses) with pcDNA3 Flag FoxO1 constitutively active AAA mutant plasmid (Addgene, #13508) or pcDNA3.1-FLAG (Addgene, #210342) and cells were collected 48 hours after electroporation.

To prepare MEC1 *FoxO1*-KO cells with doxycycline-inducible FoxO1 overexpression, *FoxO1* gene from pcDNA3 Flag FoxO1 plasmid (Addgene, #13507) was amplified using 5'-TGGAGAATTGGCTAGCATGGCCGAAGCGCCTCAGGTGGTGGAGATCGACCCG-3' and 5'-CCCCAACCCCGGATCCTCAGCCTGACACCCAGCTATG-3' primers and Q5® Hot Start High-Fidelity 2X Master Mix (New England Biolabs) and cloned into pCW57-MCS1-P2A-MCS2 plasmid (Addgene, #80921). Empty pCW57-MCS1-P2A-MCS2 plasmid was used as control. MEC1 cells were then transduced by the plasmid in the same way as HS5<sup>CD40L,IL-4,IL-21</sup> as described above.

### **Competitive growth assay, cell treatments and stimulations**

MEC1<sup>wild-type</sup> and MEC1<sup>FoxO1-KO</sup> clones were traced with a plasmid encoding GFP or AZURIT, respectively (and *vice versa* to eliminate potential bias from constructs), and their equal numbers were mixed in a 1:1 ratio (validated by flow cytometry) and seeded with DMSO or ibrutinib or idelalisib (both 2 µM, Selleckchem). For MEC1<sup>wild-type</sup> and MEC1<sup>Rictor-KO</sup> clones competitive growth assay, MEC1<sup>wild-type</sup> traced with a plasmid encoding GFP or AZURIT and unstained MEC1<sup>Rictor-KO</sup> clones were mixed in a 1:1 ratio and seeded with DMSO or ibrutinib (2 µM, Selleckchem). Fresh media with DMSO or ibrutinib was added to the cells three times a week and changes in ratios (KO vs wt) were measured by flow cytometry after 1 to 4 weeks of the treatment.

For in vitro treatments, MEC1 cells (1×10<sup>6</sup>/ml) and primary CLL cells (10×10<sup>6</sup>/ml) were treated with ibrutinib (2 µM for MEC1, 1 µM for primary CLL cells), acalabrutinib (5 µM for MEC1, 1 µM for primary CLL cells), pirtobrutinib (2 µM for MEC1, 1 µM for primary CLL cells), idelalisib (2 µM for MEC1, 1 µM for primary CLL cells), MK-2206 (Akt inhibitor, 1.25, 2.5, 5 and 10 µM), AS1842856 (FoxO1 inhibitor, 0.5 µM), AZD8055 (mTOR inhibitor, 0.5 µM; all Selleckchem, pirtobrutinib MedChemExpress).

For BCR activation by bead-bound anti-IgM, Dynabeads M-270 Epoxy were coated according to Dynabeads Antibody Coupling Kit (Thermo Fisher Scientific) with goat F(ab')<sub>2</sub> anti-human IgM (4, 5) (10 µg of antibody/mg beads) at 37°C overnight and then resuspended in the recommended buffer at

a final bead concentration of 10 mg of antibody coupled beads/ml. Primary CLL cells ( $10 \times 10^6$ /ml) were incubated with bead-bound anti-IgM or the isotype control in complete RPMI-1640 medium for 3 hrs at 37°C (at a 2:1 beads to cell ratio). For short-term BCR activation the BCR was crosslinked for 10 min by soluble goat F(ab')<sub>2</sub> anti-human IgM (anti-IgM, Southern Biotechnology; 20 µg/ml) (2).

### **mRNA profiling (RNAseq) and data analysis**

Total RNA was isolated by TRIzol (Molecular Research Center) as described previously (6). The sequencing of poly(A) transcriptome was performed as described previously (7). Briefly, libraries for samples CLL16, CLL39, CLL47, CLL50, CLL52-53, CLL60-65, and CLL68 were prepared using TruSeq Stranded mRNA LT Sample Prep Kit (Illumina) according to the manufacturer instructions. The final libraries were diluted to the desired concentration of 2 pM and were used to prepare a paired-end flow cell using a cBot System (Illumina) and then sequenced with Illumina NextSeq 500/550 High Output v2.5 kit (Illumina) generating 75-bp paired-end sequences. For samples CLL15, CLL19-23, and CLL43, libraries were prepared using TruSeq RNA Access Kit (Illumina) according to the manufacturer instructions. The final libraries were diluted to the desired concentration of 9 pM and sequenced with Illumina HiSeq 1000 (Illumina) generating 50-bp paired-end sequences.

The quality of the sequencing data was checked using the FastQC (8) (v0.11.3) and Kraken package (9) (v13-274). The presence of adapters was scanned using Minion and Swan (Kraken package, v13-274). Pre-processing of the raw reads was done using Trimmomatic (10) (v0.36) in the following steps (i) *N* and very low-quality bases (Phred < 3) from both 5' and 3' ends were removed, (ii) poly(A) and poly(T) tails were removed, (iii) sequencing adapters were removed, (iv) reads were trimmed to a maximal length of 75 bp, (v) low quality ends with average Phred score < 5 of 4 consecutive bases were trimmed using the sliding window approach, (vi) reads shorter than 15 bp and without a proper pairing after the pre-processing were removed. The pre-processed reads were then mapped to the *H. sapiens* reference genome (Ensembl release 84, primary assembly (11)) together with corresponding Ensembl genome annotation (Ensembl release 84) using STAR (12) (v2.5.2a) in 2-pass mapping approach. Exon-mapped reads were summarized to genes using STAR (a similar approach to the HTSeq-count (13) 'union'). Only uniquely mapped reads were used. Strandedness of the sequencing protocol was considered and 'reverse' counts were used. Differential gene expression was analyzed using DESeq2 (14) (v1.13.8) Bioconductor package for genes with a base mean count >200 per million. P-values were adjusted for multiple testing using the Benjamini-Hochberg method. Heatmaps were generated using matrix visualization software Morpheus by Broad Institute (RRID:SCR\_017386). Data has been deposited at the European Genome-phenome Archive (EGA), which is hosted by the EBI and the CRG, under accession numbers EGAS50000000620 and EGAS50000000621.

*BTK/PLCG2* variants were identified from RNAseq data as described previously (7). Briefly, quality check of raw paired-end fastq reads was carried out by FastQC v0.11.9 (15). The adapters were not removed due to their negligible amount. Quality trimming of raw fastq reads was performed using

Trimmomatic v0.39 (10). Cleaned RNA-Seq reads were mapped against the genomic reference GRCh38 using the STAR v2.7.3a (16). Mapped PCR duplicates were identified and removed using Picard v2.27.1 (17). The gene counts were produced using featureCounts from Subread v2.0 (18). Quality control after alignment concerning the number and percentage of uniquely- and multi-mapped reads, mapped regions, read coverage distribution, strand specificity, and PCR duplication was performed using several tools namely RSeQC v4.0.0 (19), Picard toolkit v2.25.6 and Qualimap v2.2.2 (20). Mutant-specific small variants (indels and SNVs) were called as somatic tumor-only. For aggregating calls from Strelka (21), VarDict (22), MuTect2 (23), and VarScan2 (24) in-house script was used. The resulting variants were annotated using Variant Effect Predictor (25).

### **Genome-wide binding of FoxO1 by CUT&RUN**

CUT&RUN was done following the standard Janssens *et al.* protocol (26) with some modifications. Nuclei from 0.5 million MEC1 cells were used per condition. Briefly, upon washes nuclei were extracted using a nuclear extraction buffer (20 mM Hepes pH 7.9, 10 mM KCl, 0.1% Triton X-100, 20% glycerol, 1 mM MnCl<sub>2</sub>, and 0.5 mM spermidine) with Complete EDTA-free protease inhibitors (Roche), incubated 10 min on ice, and recovered by centrifugation 3 min, 600xg at 4 °C. Nuclei were resuspended in 100 µl/sample nuclear extraction buffer and conjugated with 10 µl/sample of activated Concanavalin-coated magnetic beads (Bangs Laboratories). Binding of antibodies was performed overnight with 50 µl of antibody buffer (containing a final concentration of 0.01% of digitonin) and an antibody dilution of 1:50. Binding of pAG-Mnase was done for 2 hrs in 150 µl of buffer (containing 0.05% of digitonin) and 700 ng/ml of the pAG-Mnase protein (kindly shared with us by Dr Manuel Serrano, IRB, Barcelona, Spain). To start chromatin digestion freshly prepared 0.1 M CaCl<sub>2</sub> was added to each sample, mixed by pipetting and incubated for 30 min on ice. To stop the reaction 100 µl of Stop Buffer was used, followed by 30 min incubation at 37°C with gentle mixing. Supernatant containing the digested chromatin was kept and DNA was extracted with Phenol Chloroform extraction.

Libraries were prepared following Nan Lui protocol(27) with the NEBNext Ultra II DNA library preparation kit (Cat# E7645S, Illumina) and were sequenced with Illumina NextSeq 500, High output v2.5 kit generating 75-bp paired-end sequences. The quality of the sequencing data was checked using FastQC (v0.11.9). Processing of the data was done using the cutruntools2.0 (28), using default parameters and the option of keeping 120 bp fragments. Peak calling was done using MACS2 (version 2.2.6), on deduplicated reads, using the IgG negative control (#5415, Cell Signaling). A cut off of 0.01 false discovery rate was used as a threshold and paired-end was taken into consideration. Genomic annotation of peaks was done using ChIPseeker R package. For motif analysis a window of +/- 200 bp around peak summits was analyzed using Centrimo (29) with default parameters.

### **Flow cytometry and cell sorting**

Cell viability was investigated by DiOC6 (3,3'-dihexyloxacarbocyanine iodide) together with PI (propidium iodide) staining (Thermo Fisher Scientific) as described previously (30). Viability of thawed CLL cells from patients treated with ibrutinib in vivo and afterwards treated with FoxO1 inhibitor, ibrutinib or their combination in vitro was investigated by 7-AAD Viability Staining (eBioscience) together with DiOC6 staining (Thermo Fisher Scientific).

For cell cycle analysis, the cells were fixed in ice-cold 70% ethanol, washed twice with PBS, and stained with Vindelov's reagent (10mM TRIS pH 8.0, 10mM NaCl, 50 ng/mL propidium iodide, 40ng/mL RNase A) for 30 min at 37 °C. The cell cycle analysis was performed in FlowJo10.8.1 (FlowJo, LLC) using univariate Watson (Pragmatic) model.

For cell-surface staining, primary CLL cells or cell lines were labeled with one or combination of antibodies against: CD184 [CXCR4] (BV421, clone 12G5; BioLegend), CD20 (APC-eFluor 780, clone 2H7; eBioScience), CD5 (APC, clone L17F12; eBioScience). All measurements were performed on FACS Verse (BD Biosciences-US) and cell sorting on BD FACSAria Fusion (BD Biosciences-US).

### **Immunoblotting**

Cells were lysed in lysis buffer (1% SDS, 50 mM TRIS-HCL pH 6.8, 10% glycerol) with phosphatase and protease inhibitors (Sigma Aldrich) and protein concentration was determined using DC Protein Assay (BioRad). Equal amounts of protein were separated by SDS-PAGE and transferred to the PVDF membrane (0.45 µm pore size, Millipore). The membranes were incubated with the Cell Signaling antibodies against the following immobilized proteins: Rictor (#2114, 1:2000), mTOR (#2983, 1:2000), pmTOR (#2974, 1:1000), FoxO1 (#2880, 1:2000), pFoxO1 (#2599, 1:1000), Akt (#2920, 1:2000), pAkt<sup>S473</sup> (#4060, 1:1000), GSK3α/β (#5676, 1:2000), pAkt<sup>T308</sup> (#13038, 1:1000), pBTK (#5082, 1:1000), BTK (#3533, 1:2000), GAB1 (#3232, 1:2000), pGSK3α/β (#9331 1:2000), cMYC (#5605, 1:2000), GAPDH (#2118, 1:2000) or with anti-vinculin antibody (sc73614, 1:2000, Santa Cruz). Secondary horse-radish peroxidase (HRP)-conjugated anti-mouse or anti-rabbit antibodies (both Cell Signaling) were used to detect primary antibodies. Immunocomplexes were detected using ECL (BioRad), and the chemiluminescent signal was digitally detected with UVItec Alliance 4.7 (UVItec).

### **WST-1 assay**

5×10<sup>5</sup> MEC1 cells or 5×10<sup>4</sup> primary CLL cells were seeded in 200 µl of media with addition of chosen inhibitors. After 48 hrs, 10 µl of Cell Proliferation Reagent WST-1 (#5015944001, Merck) was added to each condition. Cells were incubated for additional 0.5 to 4 hrs and the absorbance was measured according to the manufacturer's instructions.

### CFSE proliferation assay

Purified CLL cells were loaded with cell trace dye (CFSE Dye, Invitrogen) as previously described (31). Briefly, up to  $5 \times 10^7$  CLL cells were resuspended in 400  $\mu$ l of PBS in 1.5 ml tube and 80  $\mu$ l of PBS was put into the top of the tube. 0.5  $\mu$ l of 5 mM CFSE dye was resuspended in the top and immediately mixed with the cell suspension. After 5 min incubation at room temperature, cells were washed two times with 5 % FBS in PBS. Cells were then seeded onto  $\gamma$ -irradiated HS5<sup>wild-type</sup> or HS5<sup>CD40L,IL-4,IL-21</sup> cells in a ratio 20:1 (CLL:HS5) (32), co-cultured with DMSO or inhibitors and analyzed 5 or 10 days later by flow cytometry. Proliferation was analyzed by Proliferation platform in FlowJo v10.8 with manual correction. Rate of proliferation was plotted as precursor frequency which represents the probability that a cell will divide at least once (33).

### Cell line-derived xenograft mouse models

For competitive in vivo growth assay, MEC1<sup>wild-type</sup> and MEC1<sup>FoxO1-KO</sup> clones were traced with a plasmid encoding GFP or AZURIT, respectively (and *vice versa* to eliminate potential bias from constructs), and their equal numbers were mixed in a 1:1 ratio ( $1.5 \times 10^6$  per wild-type and the same number per FoxO1-KO clone) and injected into tail vein of NSG (NOD.Cg-Prkdc<sup>scid</sup> Il2rg<sup>tm1Wjl</sup>/SzJ, The Jackson Laboratory) mice (2 males and 2 females, 5-month old). Mice were sacrificed 3 weeks after the MEC1 injection, and spleen, liver, blood, and bone marrow were analyzed for the ratio of GFP+:AZURIT+ cells by flow cytometry. The results were consistent irrespectively of the use of male vs female mice.

For in vivo testing of ibrutinib/FoxO1 inhibitor treatment, GFP positive MEC1 ( $3 \times 10^6$ ) were intravenously injected into female NRG mice (NOD.Cg-Rag1<sup>tm1Mom</sup> Il2rg<sup>tm1Wjl</sup>/SzJ, The Jackson Laboratory, 2 to 3-month old). Female mice were selected to obtain maximal consistency in engraftment based on our previous experience, but the results should not be influenced by use of one animal sex. Mice were divided randomly after three days of leukemia engraftment into two groups and treated with either ibrutinib (n=9) or a combination of ibrutinib and FoxO1 inhibitor (n=9). Mice were sacrificed 14 days after the MEC1 injection, and bone marrow was analyzed for the percentage of GFP+ cells (schematic of the experiment in Figure A). Ibrutinib (MedChemExpress) was dissolved in drinking water with 1% HP- $\beta$ -CD at a concentration 0.08 mg/ml, which is equivalent to a dose of 25 mg/kg/day. FoxO1 inhibitor (AS1842856, MedChemExpress) was dissolved (5% DMSO, 50% PEG-300, 5% Tween-80) and injected intraperitoneally daily at a dose of 30 mg/kg/day. Flow cytometry assessed the percentage of MEC1 cells in the organ as the percentage of GFP+ cells out of viable cells.

### Statistical analysis

Apart from NGS analysis, all statistical analyses were performed with Prism v8.0.1 (GraphPad). Values of  $P < 0.05$  were considered statistically significant. Data in graphs represent mean  $\pm$  SEM. Enrichment of signaling pathways was performed using Enrichr tool (34) (the Ma'ayan Lab) visualizing KEGG pathways 2021.

## 2) Supplemental Figures

### Supplemental Figure 1

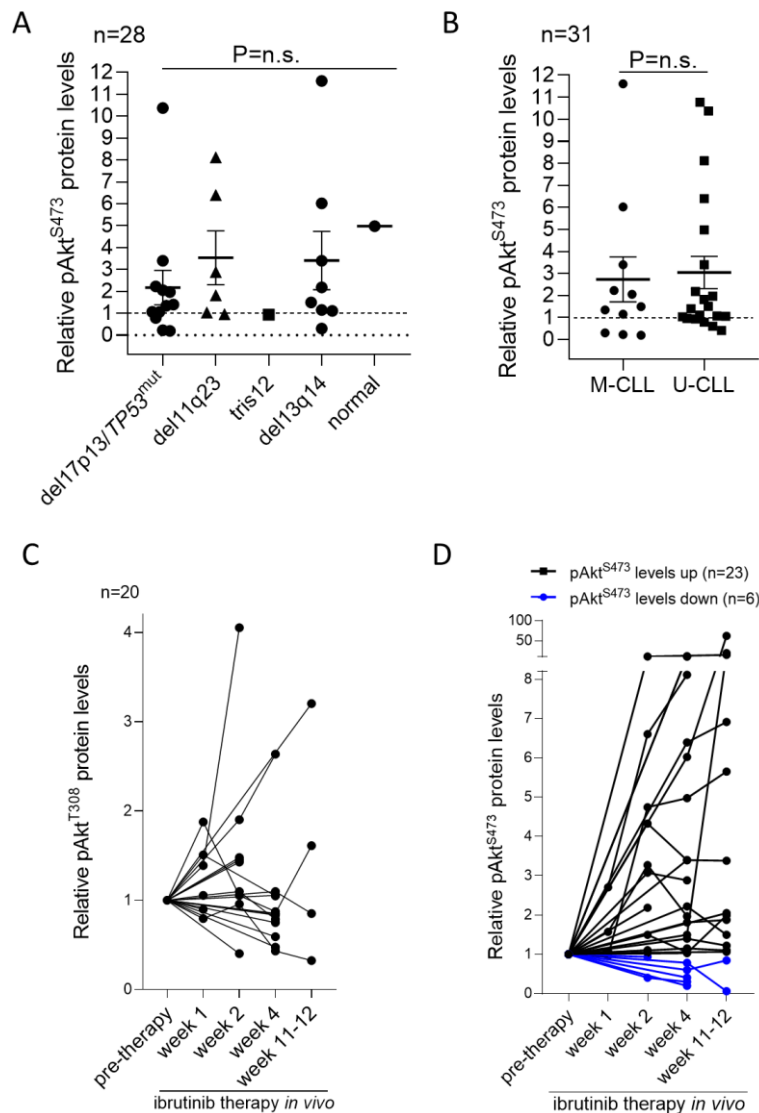

**Supplemental Figure 1.** (A) Relative pAkt<sup>S473</sup> protein levels in CLL samples obtained during ibrutinib treatment *in vivo* and stratified according to FISH abnormalities (a hierarchical Dohner classification). Statistical difference was calculated using one-way ANOVA. (B) Relative pAkt<sup>S473</sup> protein levels in CLL samples obtained during ibrutinib treatment *in vivo* and stratified according to IGHV status. M-CLL  $\leq 98\%$  homology with germinal IGHV sequence; U-CLL  $>98\%$  homology with germinal IGHV sequence. Statistical difference was calculated using unpaired t-test. (C) Densitometric quantification of relative pAkt<sup>T308</sup> protein levels in primary CLL samples obtained before and during ibrutinib treatment *in vivo* (n=20). (D) Relative pAkt<sup>S473</sup> protein levels in CLL samples obtained during ibrutinib treatment *in vivo* whose relative lymphocyte counts (ALC) are shown in Fig. 1E. Black lines indicate samples with upregulated/stable pAkt<sup>S473</sup> levels (n=23), blue lines indicate samples with downregulated pAkt<sup>S473</sup> levels (n=6).



**Supplemental Figure 2**

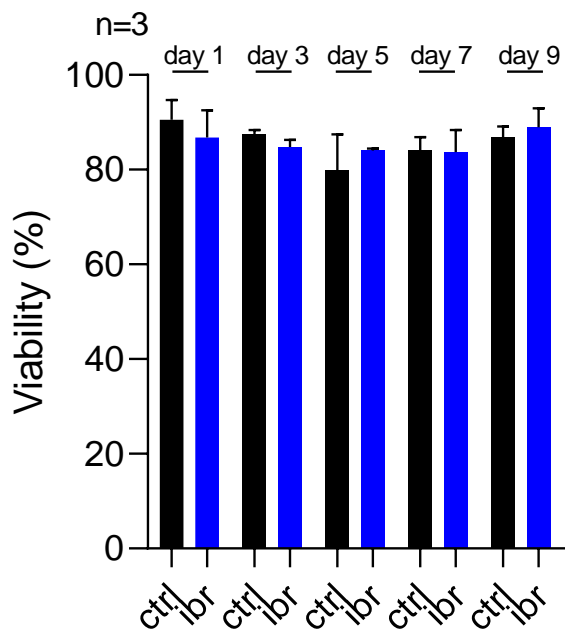

**Supplemental Figure 2.** Viability of MEC1 cells treated with ibrutinib in vitro as compared to vehicle (2  $\mu$ M, n=3, 1-9 days).

### Supplemental Figure 3

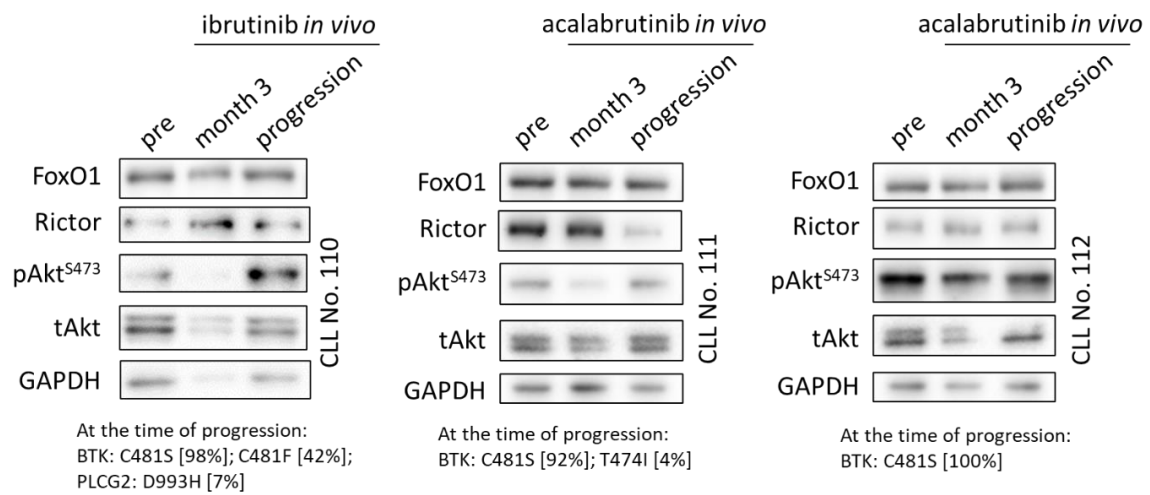

**Supplemental Figure 3.** Immunoblots of primary CLL samples before and after 3 months of BTK inhibitor therapy (n=1 for ibrutinib, n=2 for acalabrutinib) and at the time of progression with *BTK* and *PLCG2* mutation status indicated at the bottom (variant allele frequency in brackets).

**Supplemental Figure 4**

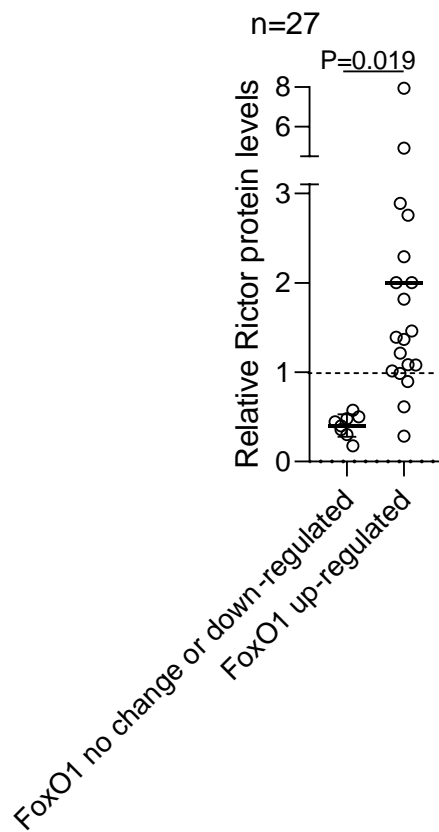

**Supplemental Figure 4.** Relative Rictor protein levels after ibrutinib therapy in vivo in patients with downregulation of FoxO1 (fold change < 0.9), no change of FoxO1 levels (fold change 0.9-1.1), or upregulation of FoxO1 (fold change > 1.1) after therapy. P-value was calculated using unpaired t-test.

## Supplemental Figure 5

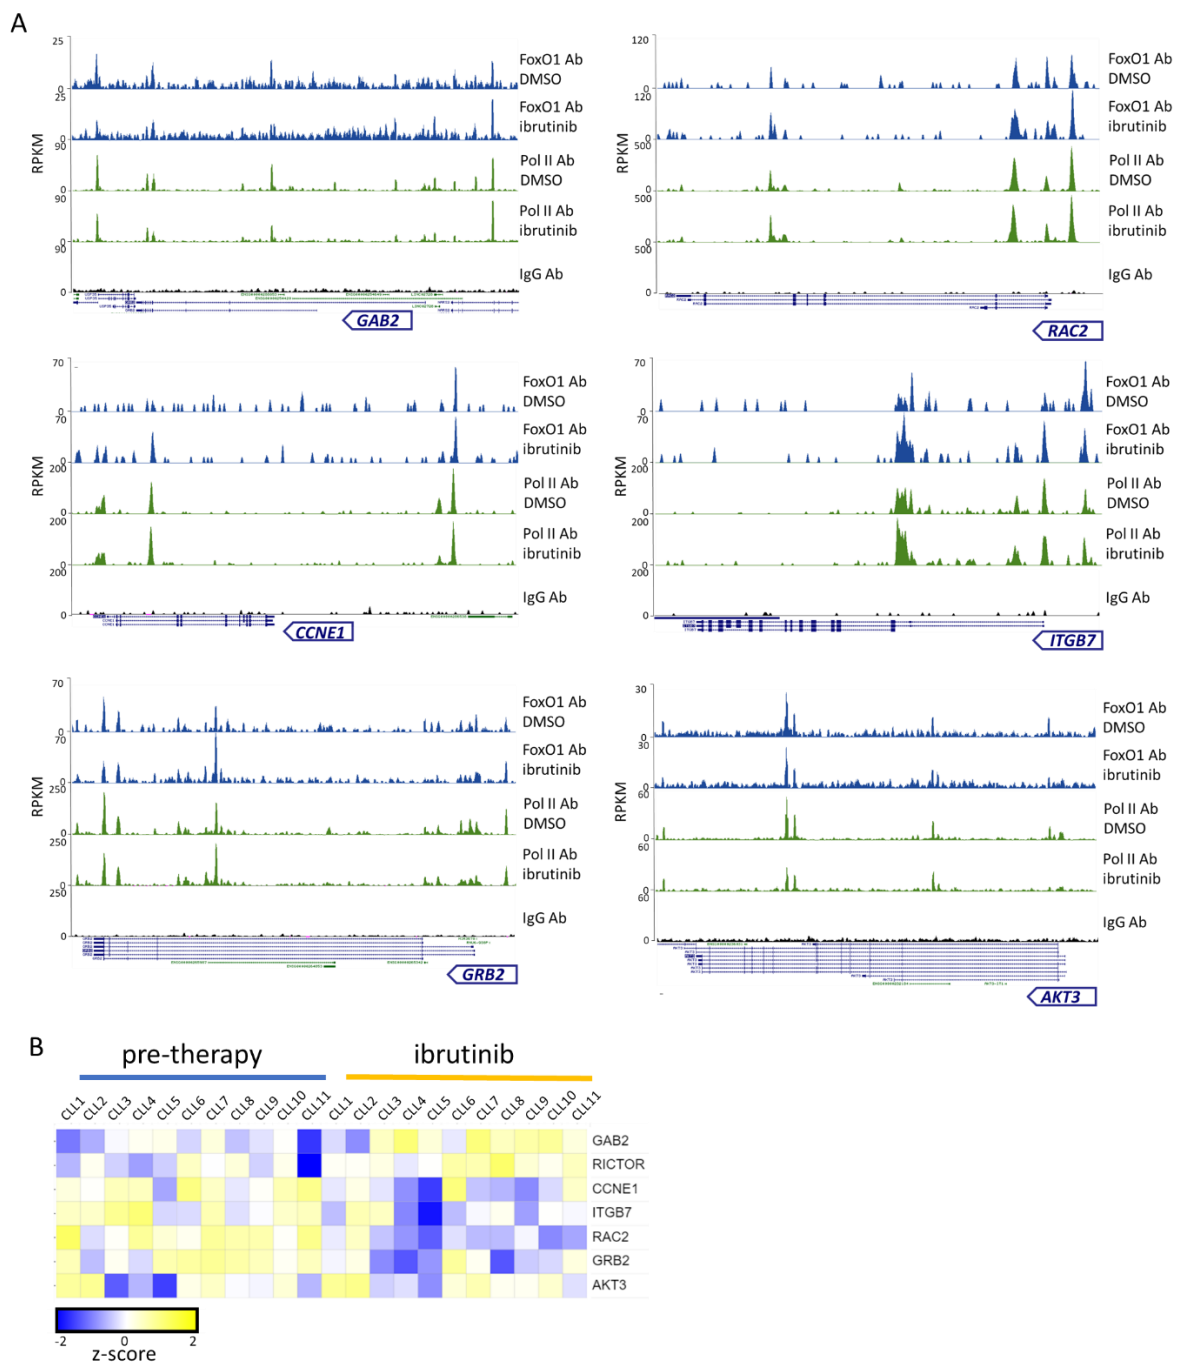

**Supplemental Figure 5.** (A) The peaks of FoxO1 binding (CUT&RUN) in regulatory regions of selected genes in MEC1 cells treated with vehicle DMSO (FoxO1 Ab DMSO) or MEC1 cells treated with ibrutinib (FoxO1 Ab ibrutinib; 1  $\mu$ M, 6 days). The selected genes are involved in PI3K/Akt pathway and are significantly changed during ibrutinib therapy in vivo (see [B]). RPKM stands for reads per kilobase per transcript per million reads mapped. (B) Heatmap of selected FoxO1 bound differentially expressed genes (see [A]) from samples obtained before and after ibrutinib treatment in vivo ( $P$  adj < 0.05; base mean > 100;  $n=11$  pairs). Lower expression is indicated in blue, higher expression in yellow.

## Supplemental Figure 6

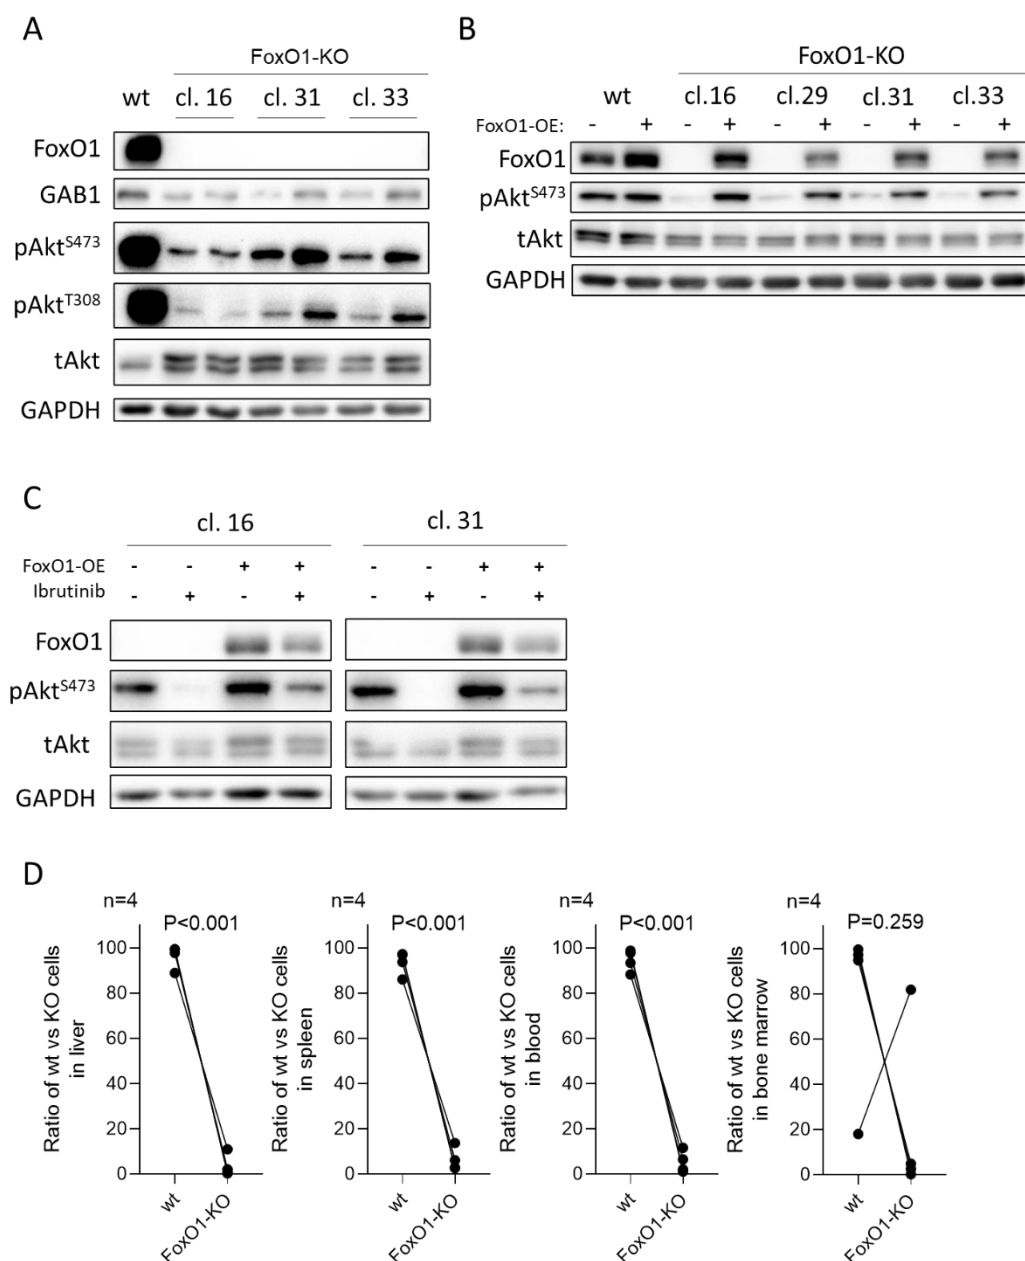

**Supplemental Figure 6.** (A) Representative immunoblot of *FoxO1*-KO MEC1 clones (cl. 16, 31, 33) in comparison to control wild-type MEC1 cells. (B) Representative immunoblot of wild-type and *FoxO1*-KO MEC1 clones 48 hrs after transfection with empty plasmid (FoxO1-OE “-”) or plasmid overexpressing constitutively active FoxO1 (FoxO1-OE “+”). (C) *FoxO1*-KO MEC1 clones (cl. 16 and 31) transduced with doxycycline-inducible empty or FoxO1 overexpressing (FoxO1-OE) plasmid treated with doxycycline (0.5  $\mu$ g/ml) and ibrutinib (2  $\mu$ M) or vehicle for 5 days. (D) Relative number of cells in a competitive growth assay of MEC1<sup>wt</sup> and MEC1<sup>FoxO1-KO</sup> (clones 29 and 31). MEC1<sup>wt</sup> and MEC1<sup>FoxO1-KO</sup> were traced with GFP or AZURIT (or vice versa) and mixed in 1:1 ratio ( $1.5 \times 10^6$  per clone) and injected into the tail vein of NSG mice (n=4, n=2 per clone [29 or 31]). Mice were sacrificed after 3 weeks, and the ratio of MEC1<sup>wt</sup> vs. MEC1<sup>FoxO1-KO</sup> in liver, spleen, blood, and bone marrow was assessed by flow cytometry. P-values were calculated using paired t-test.

## Supplemental Figure 7

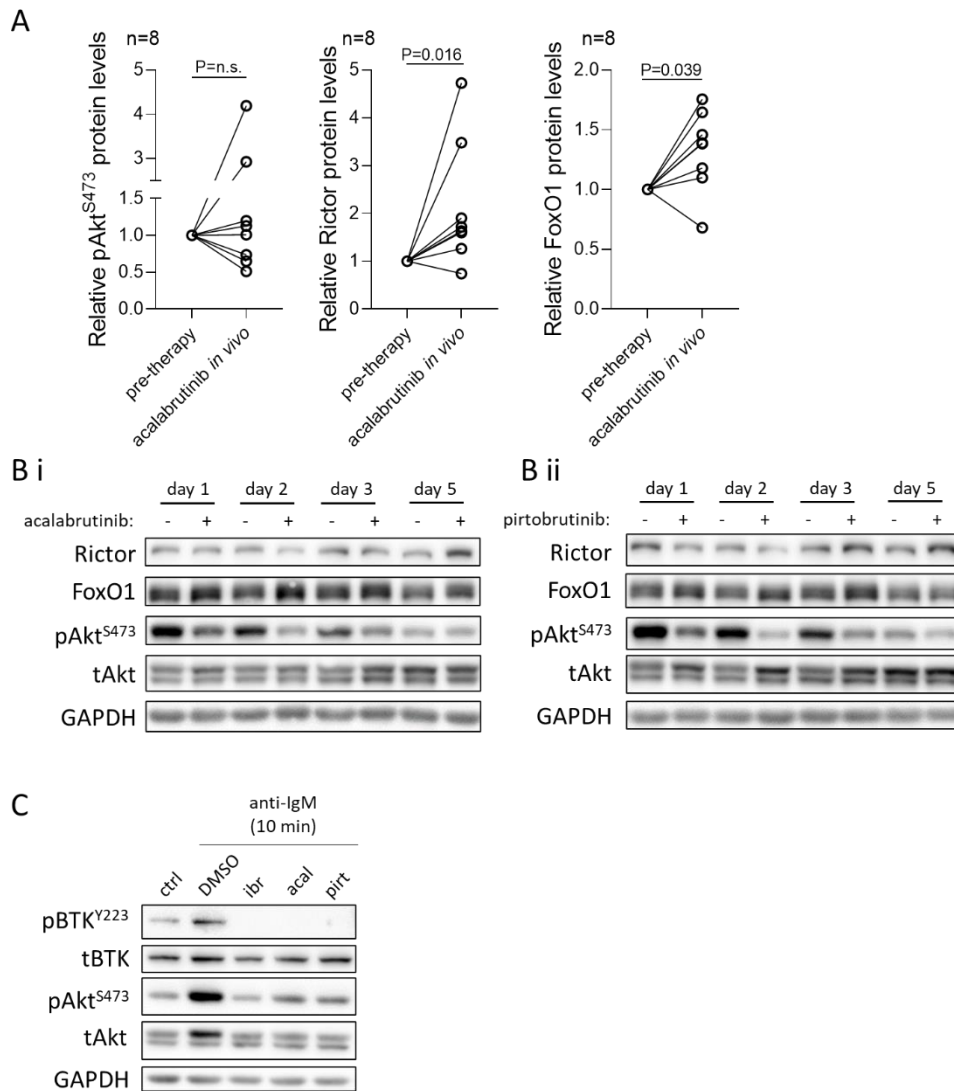

**Supplemental Figure 7.** (A) Densitometric quantification of relative pAkt<sup>S473</sup>, Rictor and FoxO1 protein level analyzed by immunoblot in primary samples obtained from CLL patients before and during treatment with acalabrutinib in vivo (1-3 months, n=8). P-values were calculated using Wilcoxon test. (B) Representative immunoblot of MEC1 cells treated with [i] acalabrutinib (5  $\mu$ M, 1-5 days) or [ii] pirtobrutinib (2  $\mu$ M, 1-5 days). (C) Representative immunoblot of MEC1 cells treated with ibrutinib (ibr, 2  $\mu$ M), acalabrutinib (acal, 2  $\mu$ M), pirtobrutinib (pirt, 2  $\mu$ M), or vehicle for 24 hrs and then BCR-stimulated with soluble anti-IgM (10 min, 10  $\mu$ g/ml). For patient characteristics, see supplemental Table 8.

**Supplemental Figure 8**

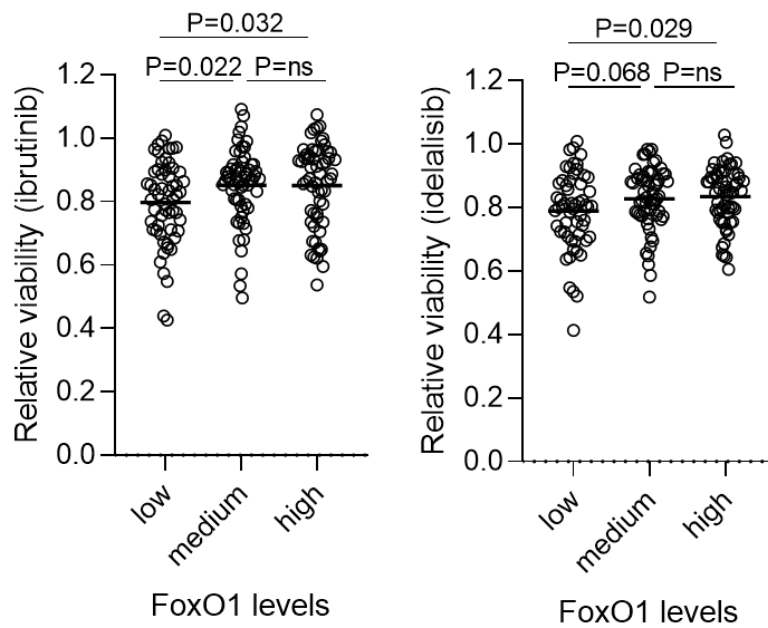

**Supplemental Figure 8.** Relative viability of primary CLL cells treated with ibrutinib (left) or idelalisib (right) in vitro (both 2  $\mu$ M) divided into terciles based on *FoxO1* mRNA levels. Data were extracted from Lu *et al.*, 2022 (35). P-values were calculated using unpaired t-test.

## Supplemental Figure 9

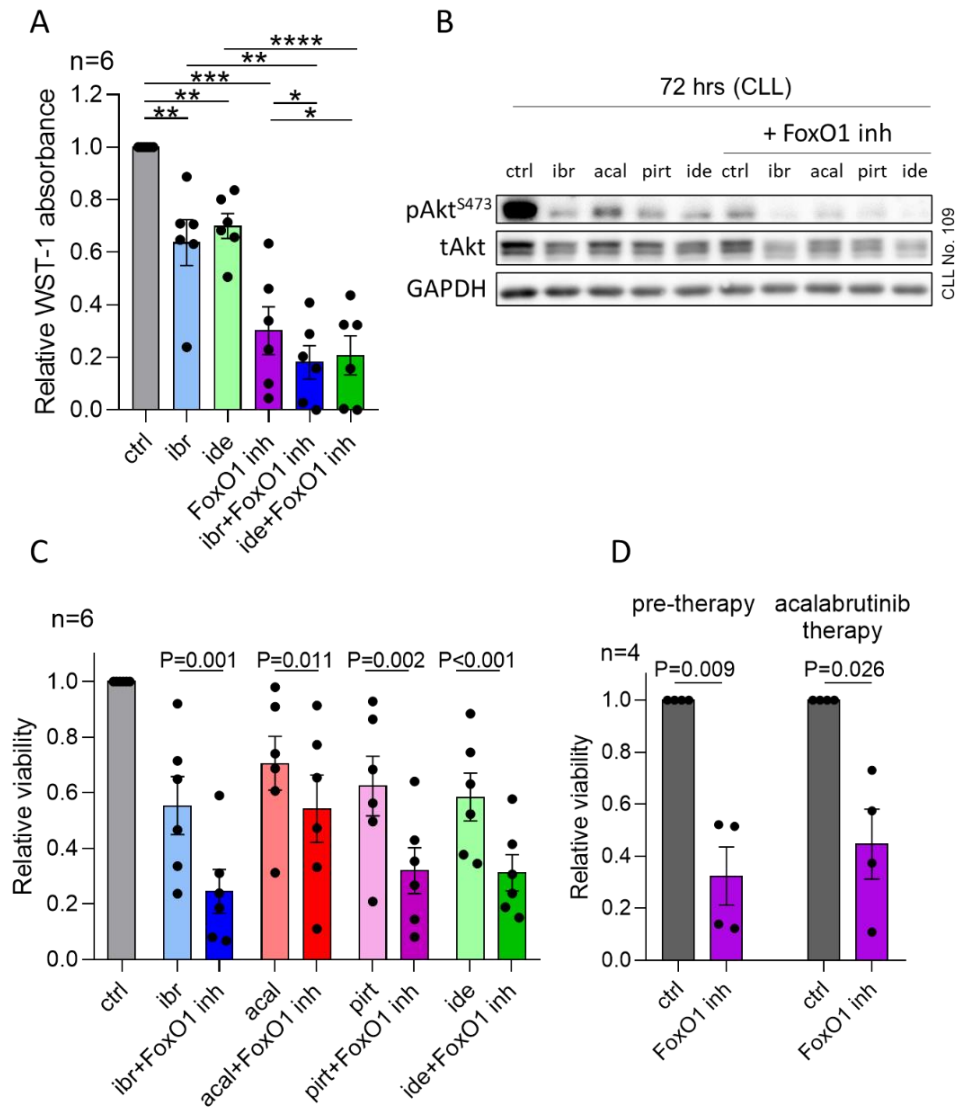

**Supplemental Figure 9.** (A) Relative WST-1 absorbance in CLL cells (n=6) treated with ibrutinib (ibr, 1  $\mu$ M), idelalisib (ide, 1  $\mu$ M), FoxO1 inhibitor (FoxO1 inh, 0.5  $\mu$ M), or their combination (48 hrs). \* stands for  $P \leq 0.05$ ; \*\* stands for  $P \leq 0.01$ ; \*\*\* stands for  $P \leq 0.001$ ; \*\*\*\* stands for  $P \leq 0.0001$ . (B) Representative immunoblot of primary CLL cells pre-treated with ibrutinib (ibr), acalabrutinib (acal), pirtobrutinib (pirt) or idelalisib (ide; all 1  $\mu$ M) for 24 hrs and subsequently treated with FoxO1 inhibitor (FoxO1 inh, 0.5  $\mu$ M) added to the culture for an additional 48 hrs. (C) Relative viability of primary CLL cells (n=6) pre-treated with ibrutinib (ibr), acalabrutinib (acal), pirtobrutinib (pirt) or idelalisib (ide; all 1  $\mu$ M) for 24 hrs and subsequently treated with FoxO1 inhibitor (FoxO1 inh, 0.5  $\mu$ M) added to the culture for an additional 48 hrs. (D) Relative viability of paired CLL samples (n=4) obtained before and during 1 (n=2) or 3 months (n=2) of acalabrutinib therapy in vivo. Cells were treated with FoxO1 inhibitor (FoxO1 inh, 0.5  $\mu$ M) for 72 hrs. For patient characteristics, see supplemental Table 8. P-values were calculated using paired t-test throughout the whole Supplemental Figure 9.



**Supplemental Figure 10**

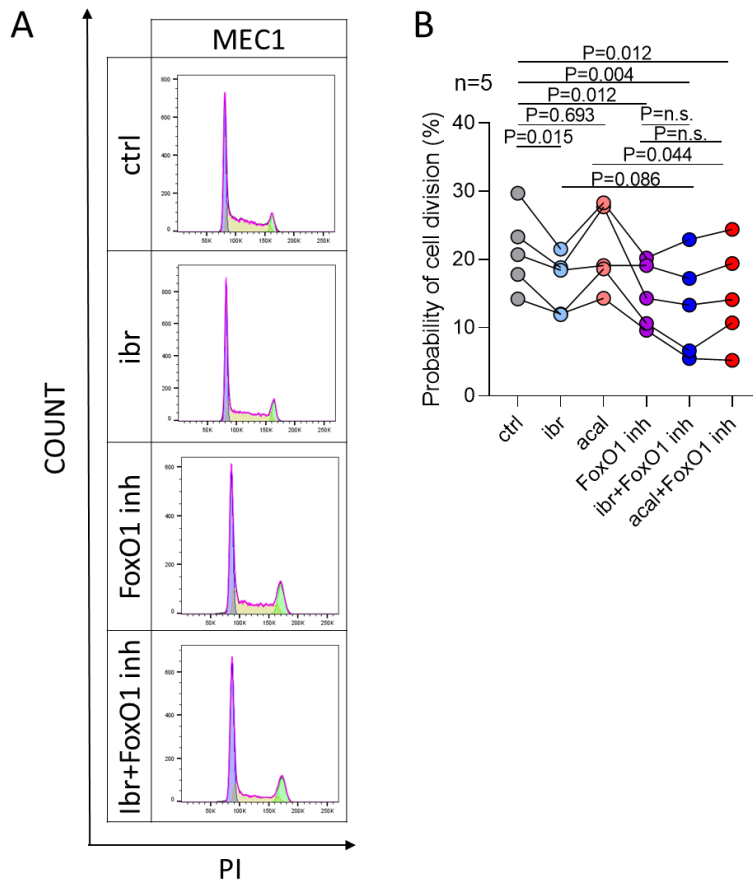

**Supplemental Figure 10.** (A) Representative histograms of cell cycle analysis (PI staining) of MEC1 cells treated with ibrutinib (ibr, 2  $\mu$ M), or FoxO1 inhibitor (FoxO1 inh, 0.5  $\mu$ M), or their combination (96 hrs). (B) Proliferation of primary CLL cells (n=5) indicated by the probability that cells will divide at least once (calculated from precursor frequency). CLL cells were co-cultured with stromal cells HS5<sup>CD40L,IL-4,IL-21</sup> and treated with ibrutinib (ibr, 1  $\mu$ M), acalabrutinib (acal, 1  $\mu$ M), or FoxO1 inhibitor (FoxO1 inh, 0.5  $\mu$ M), or their combination for 5 days. P-values were calculated using paired t-test. For patient characteristics, see supplemental Table 8.

## Supplemental Figure 11

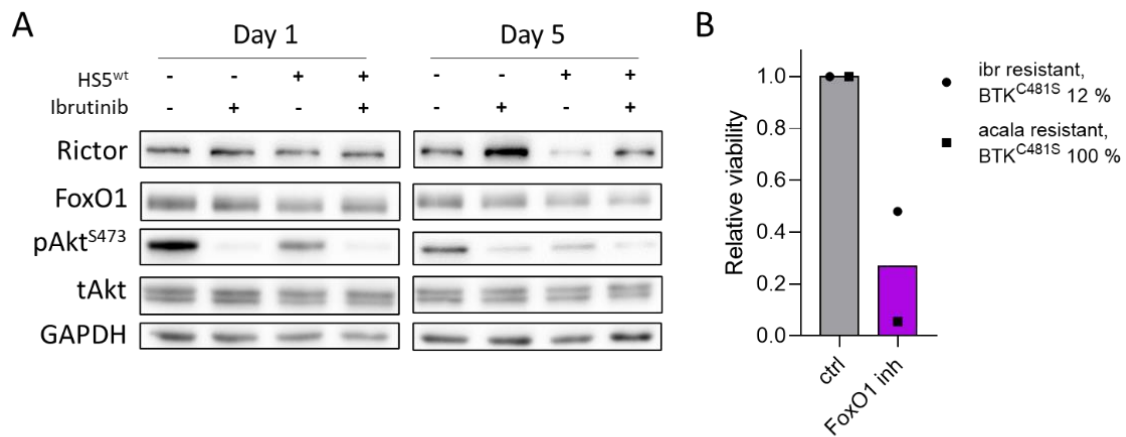

**Supplemental Figure 11.** (A) Representative immunoblot of MEC1 cells treated with ibrutinib (2  $\mu$ M) and cultured on plastic or in co-culture with irradiated HS5<sup>WT</sup> cells (1 and 5 days). MEC1 cells were seeded in 3:1 ratio (MEC1:HS5). (B) Relative viability of primary CLL cells obtained for patients at the time of progression on BTK inhibitors treated with FoxO1 inhibitor (FoxO1 inh, 0.5  $\mu$ M) for 72 hrs.

## Supplemental Figure 12

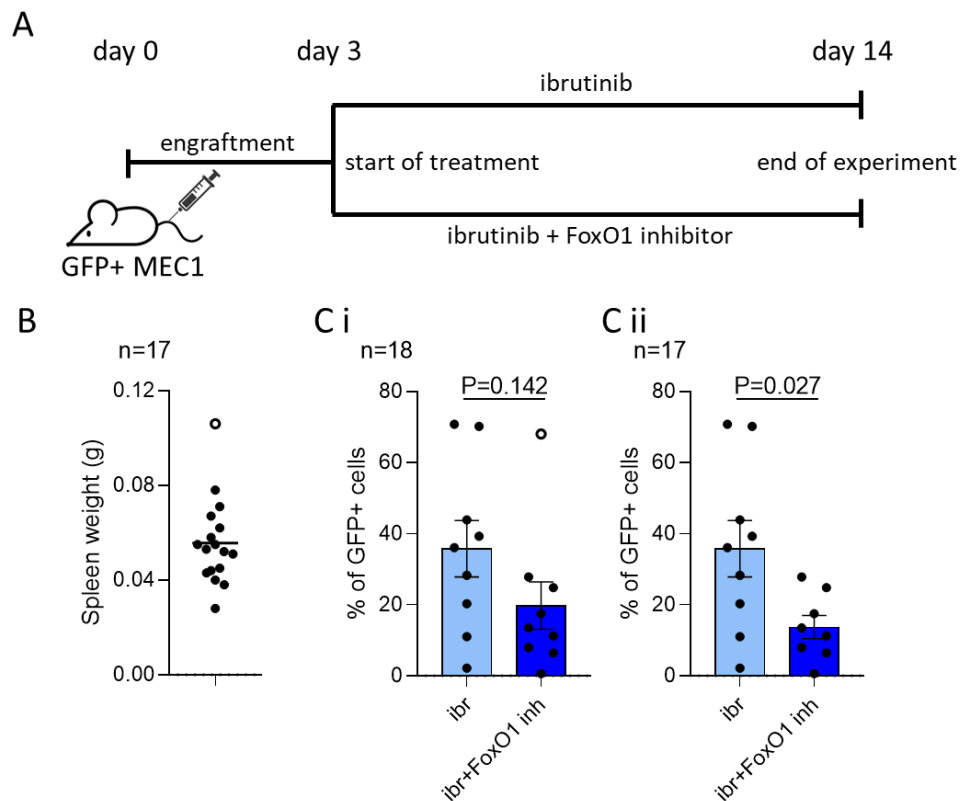

**Supplemental Figure 12.** (A) Scheme of the in vivo experiment with MEC1 cells transplanted to immunodeficient NRG mice. (B) Spleen weight in mice used in the experiment (n=17, spleen weight of 1 mouse unknown). An open circle marks the outlier organ (spleen) identified statistically by Grubbs method (Alpha = 0.05). (C) Percentage of viable GFP positive MEC1 cells (7-AAD negative) in bone marrow of NRG mice treated by ibrutinib (ibr, 25 mg/kg/day) or combination of ibrutinib (25 mg/kg/day) plus FoxO1 inhibitor (FoxO1 inh, 30 mg/kg/day). The (Ci) represents all 18 mice, and (Cii) represents 17 mice with the exclusion of the one outlier mouse in [B]. An open circle in [Ci] marks the outlier mice. P-values were calculated using unpaired t-test.

**Supplemental Figure 13**

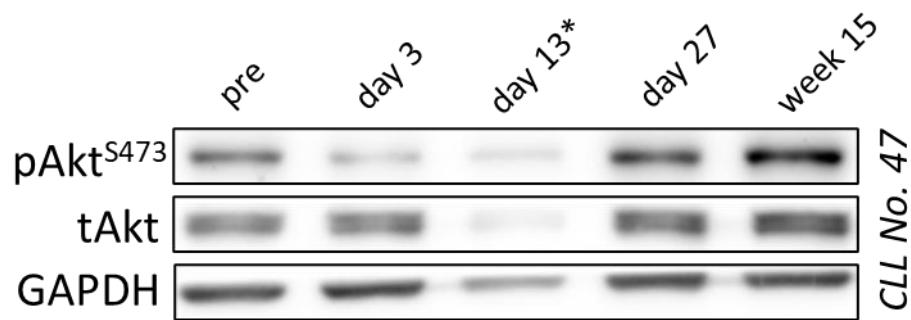

**Supplemental Figure 13.** Representative pAkt<sup>S473</sup> immunoblot of a primary CLL sample obtained before and during ibrutinib treatment in vivo, including a very early time point (day 3).

\*sample from day 13 (on therapy) is likely underloaded on the immunoblot, but the immunoblot could not be repeated due to a lack of material.

## Supplemental Figure 14

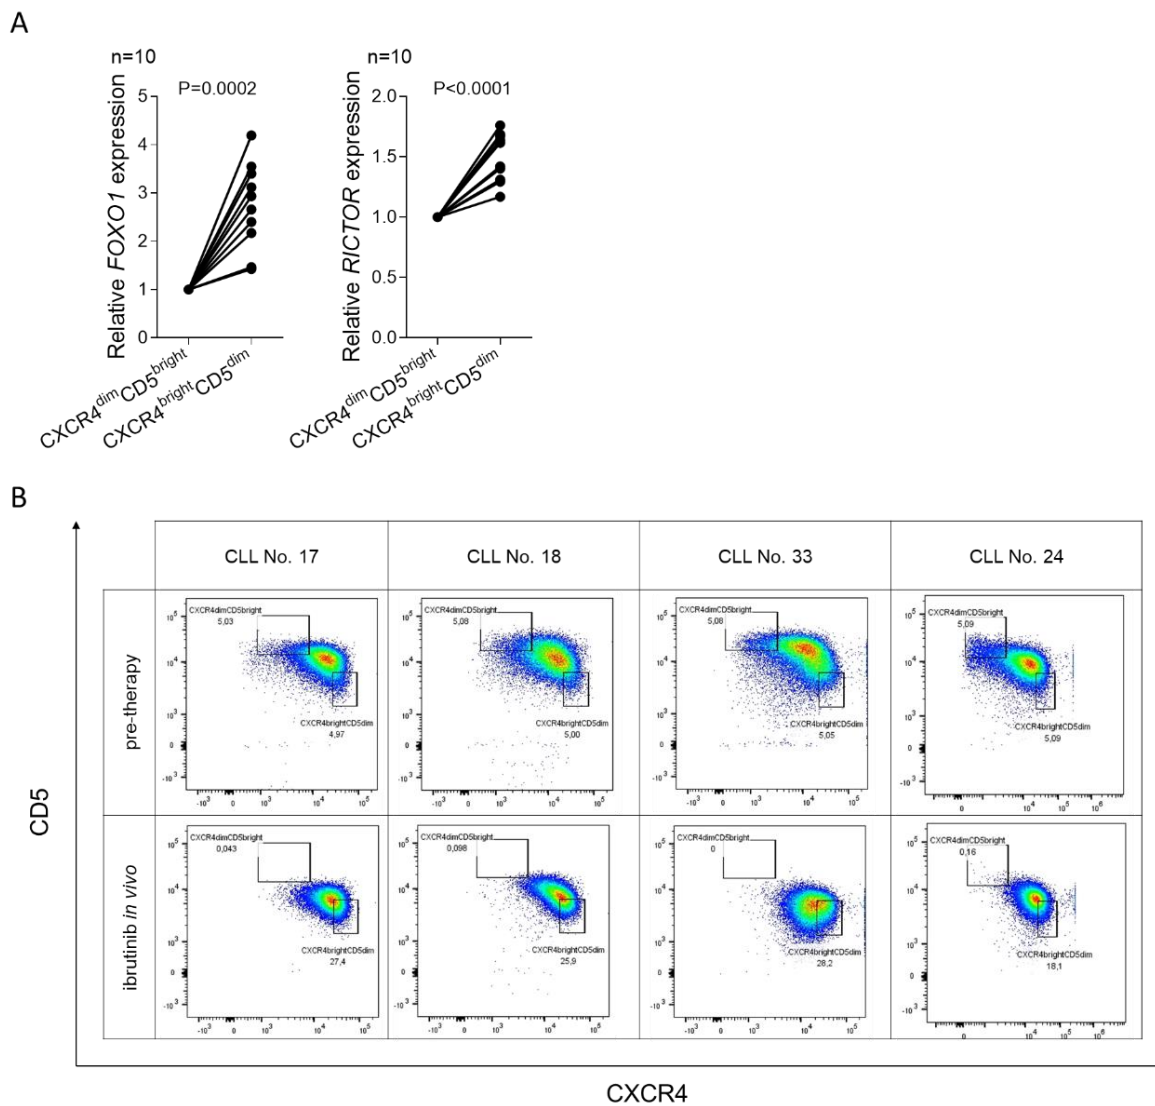

**Supplemental Figure 14.** (A) Relative expression of *FoxO1* and *Rictor* mRNAs in CXCR4/CD5 subpopulations obtained in paired samples from 10 patients. A sorting strategy for obtaining CXCR4/CD5 subpopulations was described previously (2, 5). P-values were calculated using paired t-test. (B) The shifts in intraclonal CXCR4/CD5 subpopulations in CLL samples (n=4) obtained before (top) or during ibrutinib therapy in vivo (3-8 weeks of therapy; bottom).

### 3) Supplemental Tables

Supplemental Table 1: List of top differentially expressed genes during ibrutinib therapy in vivo (top 250 upregulated and top 250 downregulated mRNAs)

| Gene ID         | Gene name     | Base Mean<br>(reads per<br>million) | Fold Change (log2)* | Adjusted P-value |
|-----------------|---------------|-------------------------------------|---------------------|------------------|
| ENSG00000165507 | C10orf10      | 103.2                               | 1.217992            | 1.35E-05         |
| ENSG00000152953 | STK32B        | 360.0                               | 0.931744            | 0.001187         |
| ENSG00000180287 | PLD5          | 345.0                               | 0.931189            | 4.69E-05         |
| ENSG00000161714 | PLCD3         | 175.7                               | 0.892518            | 0.0014           |
| ENSG00000099958 | DERL3         | 603.0                               | 0.86836             | 0.000167         |
| ENSG00000070882 | OSBPL3        | 1296.9                              | 0.848972            | 0.001361         |
| ENSG00000010278 | CD9           | 197.4                               | 0.825038            | 0.001156         |
| ENSG00000205710 | C17orf107     | 315.1                               | 0.800993            | 0.000265         |
| ENSG00000134245 | WNT2B         | 333.6                               | 0.792452            | 0.000904         |
| ENSG00000171246 | NPTX1         | 1276.6                              | 0.788703            | 0.006577         |
| ENSG00000179088 | C12orf42      | 393.6                               | 0.779687            | 0.004003         |
| ENSG00000159433 | STARD9        | 3326.0                              | 0.771129            | 0.00015          |
| ENSG00000102053 | ZC3H12B       | 628.2                               | 0.766312            | 0.000289         |
| ENSG00000166348 | USP54         | 391.0                               | 0.752302            | 8.45E-05         |
| ENSG00000272398 | CD24          | 5504.8                              | 0.748053            | 6.55E-05         |
| ENSG00000184271 | POU6F1        | 612.5                               | 0.740701            | 4.69E-05         |
| ENSG00000151623 | NR3C2         | 1175.2                              | 0.739431            | 0.007305         |
| ENSG00000128596 | CCDC136       | 126.6                               | 0.733246            | 0.008348         |
| ENSG00000204001 | LCN8          | 504.2                               | 0.731636            | 0.00479          |
| ENSG00000150672 | DLG2          | 1390.6                              | 0.706398            | 0.00479          |
| ENSG00000118432 | CNR1          | 429.7                               | 0.674792            | 0.01467          |
| ENSG00000178075 | GRAMD1C       | 512.6                               | 0.671551            | 0.007832         |
| ENSG00000161040 | FBXL13        | 144.6                               | 0.667591            | 0.003264         |
| ENSG00000197044 | ZNF441        | 2237.0                              | 0.665786            | 0.000672         |
| ENSG00000187792 | ZNF70         | 373.2                               | 0.664856            | 0.007385         |
| ENSG00000198932 | GPRASP1       | 4305.3                              | 0.657235            | 0.003067         |
| ENSG00000168026 | TTC21A        | 3640.6                              | 0.655718            | 0.000171         |
| ENSG00000174469 | CNTNAP2       | 449.5                               | 0.648414            | 0.038996         |
| ENSG00000139304 | PTPRQ         | 215.7                               | 0.64829             | 0.010489         |
| ENSG00000100490 | CDKL1         | 2166.2                              | 0.645073            | 0.013967         |
| ENSG00000076555 | ACACB         | 2157.4                              | 0.644478            | 0.000426         |
| ENSG00000184226 | PCDH9         | 8123.5                              | 0.634127            | 0.023167         |
| ENSG00000050030 | KIAA2022      | 232.0                               | 0.630462            | 0.033253         |
| ENSG00000131042 | LILRB2        | 998.7                               | 0.627954            | 0.000351         |
| ENSG00000111266 | DUSP16        | 187.2                               | 0.625274            | 0.033241         |
| ENSG00000123411 | IKZF4         | 158.4                               | 0.618365            | 0.006111         |
| ENSG00000117020 | AKT3          | 1472.6                              | 0.609996            | 0.035401         |
| ENSG00000186350 | RXRA          | 2001.6                              | 0.609032            | 0.025436         |
| ENSG00000187240 | DYNC2H1       | 1091.9                              | 0.608358            | 0.007804         |
| ENSG00000170482 | SLC23A1       | 303.8                               | 0.606358            | 0.003594         |
| ENSG00000188026 | RILPL1        | 148.8                               | 0.605288            | 0.020521         |
| ENSG00000101236 | RNF24         | 233.8                               | 0.604484            | 0.004385         |
| ENSG00000113369 | ARRDC3        | 11321.5                             | 0.602083            | 0.00012          |
| ENSG00000110318 | CEP126        | 616.2                               | 0.601834            | 0.014077         |
| ENSG00000262621 | LA16c-306E5.2 | 113.4                               | 0.601029            | 0.016819         |
| ENSG00000182463 | TSHZ2         | 341.2                               | 0.600725            | 0.019711         |
| ENSG00000265972 | TXNIP         | 94590.5                             | 0.588013            | 0.003612         |
| ENSG00000108984 | MAP2K6        | 1906.7                              | 0.585139            | 0.005653         |
| ENSG00000256574 | OR13A1        | 310.5                               | 0.583124            | 0.001861         |
| ENSG00000165029 | ABCA1         | 10492.4                             | 0.581847            | 0.023203         |
| ENSG00000168477 | TNXB          | 359.7                               | 0.577742            | 0.033591         |
| ENSG00000169762 | TAPT1         | 3206.5                              | 0.573893            | 0.00125          |

|                 |           |         |          |          |
|-----------------|-----------|---------|----------|----------|
| ENSG00000173530 | TNFRSF10D | 570.9   | 0.572443 | 0.014084 |
| ENSG00000159788 | RGS12     | 142.4   | 0.57075  | 0.016646 |
| ENSG00000145864 | GABRB2    | 1565.7  | 0.570059 | 0.022619 |
| ENSG00000112182 | BACH2     | 7294.8  | 0.569345 | 0.000267 |
| ENSG00000170915 | PAQR8     | 255.3   | 0.568654 | 0.038441 |
| ENSG00000138641 | HERC3     | 6792.1  | 0.5621   | 0.012299 |
| ENSG00000170049 | KCNAB3    | 145.5   | 0.558673 | 0.023072 |
| ENSG00000118263 | KLF7      | 266.4   | 0.558263 | 0.005557 |
| ENSG00000164300 | SERINC5   | 5085.7  | 0.557253 | 0.027353 |
| ENSG00000135749 | PCNXL2    | 1913.6  | 0.555857 | 0.02176  |
| ENSG00000185800 | DMWD      | 588.4   | 0.555252 | 0.004777 |
| ENSG00000105948 | TTC26     | 417.6   | 0.547296 | 0.000406 |
| ENSG00000055118 | KCNH2     | 913.7   | 0.54726  | 0.011077 |
| ENSG00000100629 | CEP128    | 475.9   | 0.546792 | 0.009957 |
| ENSG00000152818 | UTRN      | 56338.7 | 0.545833 | 0.003571 |
| ENSG00000101846 | STS       | 274.5   | 0.544243 | 1.35E-05 |
| ENSG00000150907 | FOXO1     | 3453.0  | 0.542957 | 0.000456 |
| ENSG00000178917 | ZNF852    | 942.6   | 0.542681 | 0.036825 |
| ENSG00000082269 | FAM135A   | 802.7   | 0.542014 | 0.00066  |
| ENSG00000213923 | CSNK1E    | 4612.6  | 0.541285 | 0.004421 |
| ENSG00000176438 | SYNE3     | 4738.7  | 0.540995 | 0.002266 |
| ENSG00000033327 | GAB2      | 4616.3  | 0.539883 | 0.001197 |
| ENSG00000198879 | SFMBT2    | 633.2   | 0.539576 | 0.024628 |
| ENSG00000131697 | NPHP4     | 327.3   | 0.538899 | 0.000584 |
| ENSG00000165115 | KIF27     | 1052.5  | 0.537889 | 0.006288 |
| ENSG00000234284 | ZNF879    | 366.0   | 0.537848 | 0.036438 |
| ENSG00000163611 | SPICE1    | 2157.6  | 0.536863 | 0.011442 |
| ENSG00000072364 | AFF4      | 12339.9 | 0.535352 | 0.012698 |
| ENSG00000196712 | NF1       | 7960.4  | 0.535228 | 0.000286 |
| ENSG00000146776 | ATXN7L1   | 873.6   | 0.533652 | 0.002006 |
| ENSG00000164970 | FAM219A   | 284.4   | 0.530713 | 0.001135 |
| ENSG00000206530 | CFAP44    | 2375.2  | 0.52926  | 0.006817 |
| ENSG00000170222 | ADPRM     | 862.3   | 0.527325 | 1.04E-05 |
| ENSG00000106537 | TSPAN13   | 506.1   | 0.527293 | 0.033975 |
| ENSG00000125844 | RRBP1     | 10655.6 | 0.523047 | 0.020721 |
| ENSG00000126705 | AHDC1     | 833.2   | 0.522966 | 0.014924 |
| ENSG00000146757 | ZNF92     | 11403.6 | 0.522492 | 0.029026 |
| ENSG00000197841 | ZNF181    | 956.9   | 0.521547 | 0.001923 |
| ENSG00000131375 | CAPN7     | 3522.1  | 0.518943 | 0.011614 |
| ENSG00000163346 | PBXIP1    | 6916.4  | 0.517252 | 0.007653 |
| ENSG00000163001 | CFAP36    | 514.9   | 0.513344 | 0.020547 |
| ENSG00000138443 | ABI2      | 1256.9  | 0.513276 | 0.002659 |
| ENSG00000066923 | STAG3     | 412.4   | 0.512728 | 0.017803 |
| ENSG00000181074 | OR52N4    | 252.5   | 0.511234 | 0.006388 |
| ENSG00000196074 | SYCP2     | 869.4   | 0.509674 | 0.001187 |
| ENSG00000144645 | OSBPL10   | 6584.8  | 0.504423 | 0.012967 |
| ENSG00000146535 | GNA12     | 2765.4  | 0.500055 | 0.004462 |
| ENSG00000160961 | ZNF333    | 1113.6  | 0.498869 | 0.017863 |
| ENSG00000188636 | LDOC1L    | 208.6   | 0.498661 | 0.031418 |
| ENSG00000184384 | MAML2     | 4107.7  | 0.498261 | 0.021419 |
| ENSG00000174516 | PELI3     | 165.0   | 0.497848 | 0.03275  |
| ENSG00000180855 | ZNF443    | 433.8   | 0.497835 | 0.031031 |
| ENSG00000185591 | SP1       | 5239.9  | 0.4968   | 0.005145 |
| ENSG00000138078 | PREPL     | 3382.4  | 0.495485 | 0.00517  |
| ENSG00000001167 | NFYA      | 1626.7  | 0.494984 | 0.001502 |
| ENSG00000160201 | U2AF1     | 310.7   | 0.494403 | 0.004536 |
| ENSG00000160199 | PKNOX1    | 740.2   | 0.49405  | 0.002736 |
| ENSG00000134460 | IL2RA     | 2330.4  | 0.493945 | 0.03385  |
| ENSG00000122126 | OCLR      | 1205.0  | 0.49331  | 0.002595 |
| ENSG00000111752 | PHC1      | 987.4   | 0.49199  | 0.021407 |

|                 |          |         |          |          |
|-----------------|----------|---------|----------|----------|
| ENSG00000114859 | CLCN2    | 237.3   | 0.491197 | 5.89E-05 |
| ENSG00000004399 | PLXND1   | 1851.8  | 0.491155 | 0.025615 |
| ENSG00000147044 | CASK     | 5384.3  | 0.490916 | 0.000204 |
| ENSG00000083168 | KAT6A    | 10727.1 | 0.490613 | 0.036279 |
| ENSG00000145990 | GFOD1    | 2396.7  | 0.490445 | 0.040702 |
| ENSG00000135482 | ZC3H10   | 254.0   | 0.489345 | 0.034664 |
| ENSG00000124126 | PREX1    | 10056.7 | 0.489288 | 0.001156 |
| ENSG00000136451 | VEZF1    | 2314.2  | 0.489224 | 3.58E-05 |
| ENSG00000108557 | RAI1     | 2674.2  | 0.489221 | 0.011414 |
| ENSG00000166435 | XRRA1    | 784.7   | 0.488806 | 0.002871 |
| ENSG00000138002 | IFT172   | 1045.2  | 0.487143 | 0.007396 |
| ENSG00000072134 | EPN2     | 158.1   | 0.485377 | 0.03385  |
| ENSG00000136870 | ZNF189   | 1193.4  | 0.484981 | 0.022448 |
| ENSG00000144445 | KANSL1L  | 1367.6  | 0.484079 | 0.024004 |
| ENSG00000196172 | ZNF681   | 1015.9  | 0.482274 | 0.01844  |
| ENSG00000165959 | CLMN     | 4182.0  | 0.481872 | 0.045158 |
| ENSG00000158321 | AUTS2    | 1426.4  | 0.480441 | 0.000324 |
| ENSG00000116127 | ALMS1    | 11227.5 | 0.479909 | 0.032248 |
| ENSG00000156313 | RPGR     | 2455.8  | 0.479453 | 0.0063   |
| ENSG00000166762 | CATSPER2 | 1692.7  | 0.477297 | 0.002403 |
| ENSG00000133812 | SBF2     | 2360.8  | 0.476597 | 0.004633 |
| ENSG00000118922 | KLF12    | 2014.6  | 0.475517 | 0.000111 |
| ENSG00000130338 | TULP4    | 2563.6  | 0.473296 | 0.009957 |
| ENSG00000148429 | USP6NL   | 3495.8  | 0.471528 | 0.001235 |
| ENSG00000093072 | CECR1    | 4109.7  | 0.471494 | 0.000262 |
| ENSG00000171130 | ATP6V0E2 | 306.3   | 0.470564 | 0.043874 |
| ENSG00000101605 | MYOM1    | 1179.8  | 0.469797 | 0.024525 |
| ENSG00000107614 | TRDMT1   | 427.5   | 0.468194 | 0.012967 |
| ENSG00000100197 | CYP2D6   | 126.6   | 0.464538 | 0.031502 |
| ENSG00000167037 | SGSM1    | 2772.8  | 0.46369  | 0.043765 |
| ENSG00000196440 | ARMCX4   | 769.0   | 0.46349  | 0.004914 |
| ENSG00000132510 | KDM6B    | 4239.9  | 0.461477 | 0.032822 |
| ENSG00000154122 | ANKH     | 882.8   | 0.460336 | 0.009274 |
| ENSG00000164663 | USP49    | 213.7   | 0.457665 | 0.000659 |
| ENSG00000126970 | ZC4H2    | 709.7   | 0.457582 | 0.015976 |
| ENSG00000104375 | STK3     | 185.8   | 0.457383 | 0.045992 |
| ENSG00000170145 | SIK2     | 891.3   | 0.457211 | 0.00517  |
| ENSG00000204262 | COL5A2   | 655.7   | 0.455773 | 0.047628 |
| ENSG00000189180 | ZNF33A   | 5426.5  | 0.455483 | 0.003438 |
| ENSG00000198887 | SMC5     | 4811.6  | 0.454904 | 0.002882 |
| ENSG00000171606 | ZNF274   | 4314.6  | 0.454362 | 0.020465 |
| ENSG00000143322 | ABL2     | 1417.1  | 0.453674 | 0.001991 |
| ENSG00000189144 | ZNF573   | 490.2   | 0.453576 | 0.042446 |
| ENSG00000182134 | TDRKH    | 159.2   | 0.453181 | 0.024351 |
| ENSG00000139278 | GLIPR1   | 1163.9  | 0.453048 | 0.006864 |
| ENSG00000143669 | LYST     | 38161.0 | 0.452706 | 0.023167 |
| ENSG00000149292 | TTC12    | 1486.6  | 0.452647 | 0.000289 |
| ENSG00000100784 | RPS6KA5  | 1372.8  | 0.451861 | 0.001704 |
| ENSG00000196263 | ZNF471   | 599.1   | 0.446267 | 0.01294  |
| ENSG00000170448 | NFXL1    | 1007.6  | 0.446166 | 0.019397 |
| ENSG00000136828 | RALGPS1  | 4614.4  | 0.44427  | 0.018201 |
| ENSG00000167202 | TBC1D2B  | 513.2   | 0.443767 | 0.000491 |
| ENSG00000161996 | WDR90    | 267.7   | 0.443085 | 0.038996 |
| ENSG00000136144 | RCBTB1   | 1583.5  | 0.443062 | 0.032437 |
| ENSG00000123104 | ITPR2    | 19063.3 | 0.44133  | 0.036508 |
| ENSG00000166263 | STXBP4   | 548.7   | 0.440741 | 0.017806 |
| ENSG00000127334 | DYRK2    | 1456.3  | 0.440107 | 0.00479  |
| ENSG00000141068 | KSR1     | 486.6   | 0.43851  | 0.047628 |
| ENSG00000163291 | PAQR3    | 280.6   | 0.437775 | 0.001284 |
| ENSG00000171988 | JMJD1C   | 33907.4 | 0.436705 | 0.045772 |



|                 |           |         |          |          |
|-----------------|-----------|---------|----------|----------|
| ENSG00000143970 | ASXL2     | 4216.4  | 0.436563 | 0.026391 |
| ENSG00000143924 | EML4      | 10953.2 | 0.435329 | 0.000534 |
| ENSG00000204569 | PPP1R10   | 3748.0  | 0.43436  | 0.036438 |
| ENSG00000048707 | VPS13D    | 26851.6 | 0.43249  | 0.032962 |
| ENSG00000198752 | CDC42BPB  | 976.7   | 0.432001 | 0.001852 |
| ENSG00000196369 | SRGAP2B   | 420.9   | 0.431559 | 0.017117 |
| ENSG00000188171 | ZNF626    | 963.0   | 0.43146  | 0.031719 |
| ENSG00000187824 | TMEM220   | 235.3   | 0.430899 | 0.032888 |
| ENSG00000166501 | PRKCB     | 38714.2 | 0.430875 | 0.006699 |
| ENSG00000140386 | SCAPER    | 5973.0  | 0.430845 | 0.001346 |
| ENSG00000174428 | GTF2IRD2B | 1586.5  | 0.429942 | 0.006995 |
| ENSG00000239521 | GATS      | 1560.6  | 0.429624 | 0.025298 |
| ENSG00000186260 | MKL2      | 2746.3  | 0.429219 | 0.031418 |
| ENSG00000125827 | TMX4      | 2988.3  | 0.428564 | 0.002878 |
| ENSG00000140543 | DET1      | 242.8   | 0.428488 | 0.044889 |
| ENSG00000135093 | USP30     | 639.8   | 0.42831  | 0.018571 |
| ENSG00000173273 | TNKS      | 4668.6  | 0.427366 | 0.017972 |
| ENSG00000123374 | CDK2      | 445.8   | 0.424963 | 0.009086 |
| ENSG00000172915 | NBEA      | 3199.1  | 0.424904 | 0.045092 |
| ENSG00000109790 | KLHL5     | 3082.2  | 0.424135 | 0.042084 |
| ENSG00000124374 | PAIP2B    | 513.7   | 0.423044 | 0.005959 |
| ENSG00000221968 | FADS3     | 1839.6  | 0.422568 | 0.004517 |
| ENSG00000102043 | MTMR8     | 769.0   | 0.422155 | 0.01473  |
| ENSG00000116539 | ASH1L     | 19469.5 | 0.42112  | 0.049766 |
| ENSG00000128881 | TTBK2     | 4762.3  | 0.420958 | 0.018584 |
| ENSG00000130518 | KIAA1683  | 3896.3  | 0.420024 | 0.033604 |
| ENSG00000130684 | ZNF337    | 2252.8  | 0.419499 | 0.014152 |
| ENSG00000137504 | CREBZF    | 3813.3  | 0.419468 | 0.031467 |
| ENSG00000157796 | WDR19     | 3686.7  | 0.417247 | 0.040498 |
| ENSG00000164953 | TMEM67    | 672.7   | 0.417069 | 0.022635 |
| ENSG00000112599 | GUCA1B    | 164.5   | 0.416927 | 0.031799 |
| ENSG00000251369 | ZNF550    | 898.1   | 0.416038 | 0.007832 |
| ENSG00000134013 | LOXL2     | 419.8   | 0.415928 | 0.045158 |
| ENSG00000166432 | ZMAT1     | 4357.1  | 0.414914 | 0.03444  |
| ENSG00000198453 | ZNF568    | 807.9   | 0.414536 | 0.007874 |
| ENSG00000074755 | ZZEF1     | 8808.7  | 0.412376 | 0.029647 |
| ENSG00000133030 | MPRIP     | 5002.0  | 0.412277 | 0.003741 |
| ENSG00000149115 | TNKS1BP1  | 310.1   | 0.411955 | 0.025182 |
| ENSG00000107611 | CUBN      | 2673.6  | 0.411563 | 0.010967 |
| ENSG00000174738 | NR1D2     | 2327.0  | 0.411412 | 0.002926 |
| ENSG00000111666 | CHPT1     | 5025.7  | 0.40934  | 0.022332 |
| ENSG00000177683 | THAP5     | 938.8   | 0.408136 | 0.038565 |
| ENSG00000116977 | LGALS8    | 1294.6  | 0.407521 | 5.55E-05 |
| ENSG00000163378 | EOGT      | 802.4   | 0.406624 | 0.001059 |
| ENSG00000089280 | FUS       | 38768.7 | 0.406296 | 0.002882 |
| ENSG00000010404 | IDS       | 2305.9  | 0.405822 | 0.000367 |
| ENSG00000113658 | SMAD5     | 1767.7  | 0.405324 | 0.02294  |
| ENSG00000176225 | RTTN      | 2923.7  | 0.40507  | 0.014844 |
| ENSG00000134109 | EDEM1     | 8386.2  | 0.403641 | 0.042641 |
| ENSG00000114904 | NEK4      | 1565.7  | 0.40332  | 0.009925 |
| ENSG00000165169 | DYNLT3    | 336.8   | 0.402793 | 0.040772 |
| ENSG00000145687 | SSBP2     | 1651.8  | 0.401934 | 0.006836 |
| ENSG00000136141 | LRCH1     | 3576.3  | 0.40184  | 0.015117 |
| ENSG00000125633 | CCDC93    | 4087.2  | 0.401676 | 0.014969 |
| ENSG00000008300 | CELSR3    | 1115.8  | 0.400711 | 0.023669 |
| ENSG00000144357 | UBR3      | 7209.8  | 0.400169 | 0.021407 |
| ENSG00000135541 | AHI1      | 3891.6  | 0.399936 | 0.002128 |
| ENSG00000172765 | TMCC1     | 782.9   | 0.39818  | 0.016764 |
| ENSG00000110888 | CAPRIN2   | 3762.4  | 0.397866 | 0.000424 |
| ENSG00000119699 | TGFB3     | 336.0   | 0.397364 | 0.02082  |

|                  |          |         |          |          |
|------------------|----------|---------|----------|----------|
| ENSG00000147894  | C9orf72  | 1464.0  | 0.397313 | 0.000555 |
| ENSG00000173889  | PHC3     | 19618.2 | 0.395639 | 0.031467 |
| ENSG00000167703  | SLC43A2  | 1994.7  | 0.394992 | 0.038795 |
| ENSG00000232653  | GOLGA8N  | 239.5   | 0.393011 | 0.019068 |
| ENSG00000018189  | RUFY3    | 2330.9  | 0.392992 | 0.042231 |
| ENSG00000164440  | TXLNB    | 367.2   | 0.392    | 0.02983  |
| ENSG00000204130  | RUFY2    | 2202.7  | 0.391038 | 0.006775 |
| ENSG00000214413  | BBIP1    | 719.8   | 0.390755 | 0.014438 |
| ENSG00000182022  | CHST15   | 3316.8  | 0.390753 | 0.024525 |
| ENSG00000106479  | ZNF862   | 1697.4  | 0.389262 | 0.000324 |
| ENSG00000176155  | CCDC57   | 828.5   | 0.386807 | 0.016491 |
| ENSG00000104427  | ZC2HC1A  | 817.7   | 0.386654 | 0.015757 |
| ENSG000000067182 | TNFRSF1A | 620.9   | 0.385869 | 0.044309 |
| ENSG00000169057  | MECP2    | 3278.1  | 0.385623 | 0.026826 |
| ENSG00000120948  | TARDBP   | 2639.3  | 0.384526 | 0.00988  |
| ENSG00000166704  | ZNF606   | 1132.0  | 0.384454 | 0.027254 |
| ENSG00000107371  | EXOSC3   | 501.3   | 0.383346 | 0.047628 |
| ENSG00000151422  | FER      | 1551.5  | 0.383168 | 0.045158 |
| ENSG00000185201  | IFITM2   | 1175.8  | -0.50686 | 0.011857 |
| ENSG00000166145  | SPINT1   | 523.5   | -0.50692 | 0.005368 |
| ENSG00000175334  | BANF1    | 1313.1  | -0.50733 | 0.023023 |
| ENSG00000166446  | CDYL2    | 357.8   | -0.50771 | 0.049884 |
| ENSG00000146094  | DOK3     | 955.1   | -0.50825 | 0.036279 |
| ENSG00000145088  | EAF2     | 888.9   | -0.50989 | 0.036077 |
| ENSG00000137767  | SQRDL    | 382.1   | -0.51077 | 0.038795 |
| ENSG00000178035  | IMPDH2   | 1947.0  | -0.5112  | 0.013267 |
| ENSG00000162302  | RPS6KA4  | 301.1   | -0.51398 | 0.002595 |
| ENSG00000136573  | BLK      | 24967.5 | -0.51494 | 0.001731 |
| ENSG00000176101  | SSNA1    | 525.8   | -0.5161  | 0.026472 |
| ENSG00000065485  | PDIA5    | 146.4   | -0.5178  | 0.006575 |
| ENSG00000167797  | CDK2AP2  | 314.8   | -0.51791 | 0.035071 |
| ENSG00000139193  | CD27     | 2701.4  | -0.51817 | 0.000265 |
| ENSG00000143653  | SCCPDH   | 795.8   | -0.5187  | 0.003474 |
| ENSG00000138758  | SEPT11   | 646.7   | -0.51939 | 0.018727 |
| ENSG00000134508  | CABLES1  | 596.1   | -0.51951 | 0.045772 |
| ENSG00000079999  | KEAP1    | 249.1   | -0.51975 | 0.02406  |
| ENSG00000132185  | FCRLA    | 4510.8  | -0.52065 | 0.005707 |
| ENSG00000103415  | HMOX2    | 515.7   | -0.52127 | 0.015123 |
| ENSG00000111816  | FRK      | 705.8   | -0.52192 | 0.037784 |
| ENSG00000139725  | RHOF     | 397.1   | -0.52358 | 0.044566 |
| ENSG00000111639  | MRPL51   | 296.9   | -0.52444 | 0.014712 |
| ENSG00000168899  | VAMP5    | 642.2   | -0.52478 | 0.012787 |
| ENSG00000125457  | MIF4GD   | 832.4   | -0.52547 | 0.012967 |
| ENSG00000110697  | PITPNM1  | 1697.2  | -0.52693 | 0.000802 |
| ENSG00000072954  | TMEM38A  | 110.6   | -0.529   | 0.014221 |
| ENSG00000105364  | MRPL4    | 609.4   | -0.52902 | 0.000235 |
| ENSG00000100271  | TTLL1    | 160.3   | -0.53083 | 0.013031 |
| ENSG00000099822  | HCN2     | 112.7   | -0.53241 | 0.006229 |
| ENSG00000164088  | PPM1M    | 2029.0  | -0.53246 | 0.000659 |
| ENSG00000100348  | TXN2     | 598.1   | -0.53323 | 0.006288 |
| ENSG00000023191  | RNH1     | 1960.6  | -0.53364 | 0.023135 |
| ENSG00000124256  | ZBP1     | 758.4   | -0.53466 | 0.035119 |
| ENSG00000141905  | NFIC     | 408.1   | -0.53478 | 3.99E-05 |
| ENSG00000169442  | CD52     | 8950.5  | -0.53611 | 0.00988  |
| ENSG00000146232  | NFKBIE   | 1069.7  | -0.53777 | 0.004536 |
| ENSG00000166394  | CYB5R2   | 152.6   | -0.53803 | 0.032561 |
| ENSG00000111328  | CDK2AP1  | 160.0   | -0.53888 | 0.023167 |
| ENSG00000141858  | SAMD1    | 272.1   | -0.53963 | 0.023277 |
| ENSG00000111716  | LDHB     | 2682.8  | -0.54001 | 0.003571 |
| ENSG00000149781  | FERMT3   | 2060.6  | -0.54001 | 0.000119 |

|                 |           |         |          |          |
|-----------------|-----------|---------|----------|----------|
| ENSG00000157193 | LRP8      | 257.6   | -0.54055 | 0.032981 |
| ENSG00000196743 | GM2A      | 2694.8  | -0.54079 | 0.000376 |
| ENSG00000185522 | LMNTD2    | 214.0   | -0.54242 | 0.006487 |
| ENSG00000136810 | TXN       | 418.8   | -0.54327 | 0.037385 |
| ENSG00000103653 | CSK       | 6537.2  | -0.54409 | 0.000144 |
| ENSG00000160446 | ZDHHC12   | 182.1   | -0.5457  | 0.02777  |
| ENSG00000116663 | FBXO6     | 158.0   | -0.54663 | 0.042446 |
| ENSG00000170684 | ZNF296    | 156.9   | -0.54673 | 0.029625 |
| ENSG00000103528 | SYT17     | 1074.9  | -0.54675 | 0.005195 |
| ENSG00000198938 | MT-CO3    | 55166.7 | -0.54752 | 0.000412 |
| ENSG00000154589 | LY96      | 310.4   | -0.54798 | 0.024853 |
| ENSG00000172824 | CES4A     | 384.7   | -0.54855 | 0.018229 |
| ENSG00000167751 | KLK2      | 267.9   | -0.54973 | 0.035157 |
| ENSG00000138629 | UBL7      | 1195.3  | -0.55002 | 0.004763 |
| ENSG00000256269 | HMB5      | 419.1   | -0.55292 | 0.018229 |
| ENSG00000118640 | VAMP8     | 1202.5  | -0.55332 | 0.004385 |
| ENSG00000148180 | GSN       | 444.7   | -0.55427 | 0.037844 |
| ENSG00000051180 | RAD51     | 204.0   | -0.55508 | 0.041093 |
| ENSG00000239713 | APOBEC3G  | 2981.8  | -0.55516 | 0.016939 |
| ENSG00000166557 | TMED3     | 459.5   | -0.5596  | 0.003067 |
| ENSG00000085117 | CD82      | 2296.9  | -0.56    | 0.001062 |
| ENSG00000067836 | ROGDI     | 191.1   | -0.56114 | 0.002313 |
| ENSG00000160094 | ZNF362    | 539.6   | -0.56229 | 0.010344 |
| ENSG00000156253 | RWDD2B    | 119.6   | -0.5649  | 0.028472 |
| ENSG00000243477 | NAT6      | 181.2   | -0.56666 | 0.038795 |
| ENSG00000204392 | LSM2      | 373.9   | -0.56709 | 0.011829 |
| ENSG00000163932 | PRKCD     | 2206.7  | -0.57012 | 0.001649 |
| ENSG00000076604 | TRAF4     | 2642.3  | -0.57265 | 0.00986  |
| ENSG00000243811 | APOBEC3D  | 1529.2  | -0.57413 | 0.000493 |
| ENSG00000069399 | BCL3      | 883.3   | -0.57582 | 0.007305 |
| ENSG00000086730 | LAT2      | 488.7   | -0.57679 | 0.000456 |
| ENSG00000028137 | TNFRSF1B  | 4686.6  | -0.57903 | 0.001533 |
| ENSG00000164674 | SYTL3     | 328.5   | -0.57934 | 0.033058 |
| ENSG00000137880 | GCHFR     | 292.0   | -0.58154 | 0.031118 |
| ENSG00000204475 | NCR3      | 314.5   | -0.58203 | 0.02983  |
| ENSG00000188677 | PARVB     | 466.5   | -0.58208 | 0.026391 |
| ENSG00000063241 | ISOC2     | 123.5   | -0.58441 | 0.02983  |
| ENSG00000198736 | MSRB1     | 197.3   | -0.5846  | 0.000324 |
| ENSG00000107833 | NPM3      | 163.2   | -0.58531 | 0.044462 |
| ENSG00000087266 | SH3BP2    | 2711.4  | -0.58673 | 0.009382 |
| ENSG00000087448 | KLHL42    | 325.3   | -0.58844 | 0.000266 |
| ENSG00000100889 | PCK2      | 625.3   | -0.58965 | 0.001163 |
| ENSG00000030582 | GRN       | 6823.0  | -0.58993 | 0.004653 |
| ENSG00000101255 | TRIB3     | 136.9   | -0.5915  | 0.007721 |
| ENSG00000141337 | ARSG      | 288.1   | -0.59263 | 0.024351 |
| ENSG00000187994 | RINL      | 558.0   | -0.59627 | 0.007832 |
| ENSG00000152689 | RASGRP3   | 8035.9  | -0.59698 | 0.003844 |
| ENSG00000103089 | FA2H      | 199.8   | -0.59765 | 0.026991 |
| ENSG00000108515 | ENO3      | 464.9   | -0.59786 | 0.004738 |
| ENSG00000233276 | GPX1      | 1292.6  | -0.5985  | 0.007914 |
| ENSG00000160999 | SH2B2     | 472.0   | -0.59876 | 0.011611 |
| ENSG00000136732 | GYPC      | 787.0   | -0.59879 | 0.001156 |
| ENSG00000109971 | HSPA8     | 17927.6 | -0.6006  | 0.00098  |
| ENSG00000135925 | WNT10A    | 306.4   | -0.60084 | 0.023203 |
| ENSG00000197629 | MPEG1     | 1924.9  | -0.60204 | 0.023444 |
| ENSG00000154217 | PITPNC1   | 1185.6  | -0.6024  | 0.020743 |
| ENSG00000240505 | TNFRSF13B | 864.2   | -0.60256 | 0.007121 |
| ENSG00000157593 | SLC35B2   | 1225.1  | -0.60553 | 0.004003 |
| ENSG00000137101 | CD72      | 1913.9  | -0.60838 | 0.007259 |
| ENSG00000113758 | DBN1      | 178.9   | -0.60964 | 0.031969 |

|                 |          |         |          |          |
|-----------------|----------|---------|----------|----------|
| ENSG00000137309 | HMGA1    | 1625.7  | -0.60986 | 0.005871 |
| ENSG00000165644 | COMTD1   | 100.3   | -0.61062 | 0.038795 |
| ENSG00000146192 | FGD2     | 3145.6  | -0.61155 | 0.001163 |
| ENSG00000103152 | MPG      | 515.0   | -0.61204 | 0.002603 |
| ENSG00000198715 | GLMP     | 392.0   | -0.61404 | 2.02E-05 |
| ENSG00000142512 | SIGLEC10 | 1771.4  | -0.61485 | 0.004517 |
| ENSG00000105369 | CD79A    | 17443.6 | -0.6175  | 0.001133 |
| ENSG00000151725 | CENPU    | 277.6   | -0.61787 | 0.000716 |
| ENSG00000172292 | CERS6    | 485.9   | -0.61863 | 0.018229 |
| ENSG00000137936 | BCAR3    | 471.9   | -0.61958 | 0.001156 |
| ENSG00000111669 | TPI1     | 7524.2  | -0.61967 | 0.000617 |
| ENSG00000131747 | TOP2A    | 159.0   | -0.6199  | 0.034761 |
| ENSG00000121807 | CCR2     | 235.2   | -0.62063 | 0.036867 |
| ENSG00000169508 | GPR183   | 1226.1  | -0.62154 | 0.009104 |
| ENSG00000178741 | COX5A    | 706.4   | -0.62319 | 0.002561 |
| ENSG00000065057 | NTHL1    | 145.1   | -0.62419 | 0.005978 |
| ENSG00000177106 | EPS8L2   | 241.4   | -0.62942 | 0.011981 |
| ENSG00000102878 | HSF4     | 105.0   | -0.63132 | 0.017704 |
| ENSG00000122862 | SRGN     | 3538.5  | -0.63225 | 0.005281 |
| ENSG00000254709 | IGLL5    | 1929.5  | -0.63264 | 0.003799 |
| ENSG00000169413 | RNASE6   | 405.6   | -0.63407 | 0.014844 |
| ENSG00000171533 | MAP6     | 372.6   | -0.63426 | 0.041002 |
| ENSG00000005884 | ITGA3    | 428.5   | -0.63642 | 0.001649 |
| ENSG00000182199 | SHMT2    | 3250.4  | -0.6367  | 0.000456 |
| ENSG00000151651 | ADAM8    | 799.7   | -0.63855 | 0.026516 |
| ENSG00000213585 | VDAC1    | 1302.3  | -0.63999 | 0.001166 |
| ENSG00000056736 | IL17RB   | 298.7   | -0.64079 | 0.036438 |
| ENSG00000116586 | LAMTOR2  | 976.4   | -0.64101 | 0.001594 |
| ENSG00000161013 | MGAT4B   | 2624.3  | -0.64173 | 0.00106  |
| ENSG00000103257 | SLC7A5   | 375.6   | -0.64291 | 0.009086 |
| ENSG00000125454 | SLC25A19 | 480.2   | -0.64324 | 0.000626 |
| ENSG00000142765 | SYTL1    | 2303.7  | -0.64394 | 0.001991 |
| ENSG00000002745 | WNT16    | 196.8   | -0.64589 | 0.021862 |
| ENSG00000062524 | LTK      | 1176.4  | -0.64613 | 0.012967 |
| ENSG00000158481 | CD1C     | 103.5   | -0.64755 | 0.031502 |
| ENSG00000122176 | FMOD     | 5110.4  | -0.64785 | 0.038795 |
| ENSG00000163808 | KIF15    | 191.7   | -0.6498  | 0.017888 |
| ENSG00000138623 | SEMA7A   | 322.0   | -0.65104 | 0.028984 |
| ENSG00000277632 | CCL3     | 414.2   | -0.65357 | 0.010694 |
| ENSG00000173531 | MST1     | 185.0   | -0.6537  | 6.55E-05 |
| ENSG00000166886 | NAB2     | 153.1   | -0.6551  | 0.014221 |
| ENSG00000140105 | WARS     | 2526.6  | -0.65709 | 0.003391 |
| ENSG00000011478 | QPCTL    | 208.7   | -0.65903 | 0.002491 |
| ENSG00000136261 | BZW2     | 480.8   | -0.65935 | 0.001833 |
| ENSG00000182481 | KPNA2    | 827.6   | -0.66006 | 0.000111 |
| ENSG00000157470 | FAM81A   | 118.1   | -0.66023 | 0.020219 |
| ENSG00000042753 | AP2S1    | 480.8   | -0.66055 | 0.009453 |
| ENSG00000155368 | DBI      | 2430.6  | -0.66069 | 0.005981 |
| ENSG00000100292 | HMOX1    | 1430.8  | -0.66148 | 0.008617 |
| ENSG00000104998 | IL27RA   | 523.9   | -0.66152 | 0.000672 |
| ENSG00000151552 | QDPR     | 193.3   | -0.66453 | 0.003997 |
| ENSG00000142252 | GEMIN7   | 440.1   | -0.66475 | 0.000609 |
| ENSG00000108578 | BLMH     | 535.8   | -0.66759 | 0.002595 |
| ENSG00000146066 | HIGD2A   | 818.0   | -0.66877 | 3.58E-05 |
| ENSG00000077782 | FGFR1    | 535.2   | -0.6703  | 0.021407 |
| ENSG00000166689 | PLEKHA7  | 338.6   | -0.67093 | 0.024004 |
| ENSG00000275395 | FCGBP    | 1780.8  | -0.67777 | 0.014924 |
| ENSG00000128487 | SPECC1   | 180.0   | -0.67955 | 0.005827 |
| ENSG00000148908 | RGS10    | 745.5   | -0.68001 | 0.002128 |
| ENSG00000174123 | TLR10    | 375.2   | -0.6812  | 0.023167 |

|                 |          |         |          |          |
|-----------------|----------|---------|----------|----------|
| ENSG00000126264 | HCST     | 437.0   | -0.68379 | 0.016646 |
| ENSG00000160856 | FCRL3    | 5575.5  | -0.68797 | 0.023203 |
| ENSG00000162144 | CYB561A3 | 5319.5  | -0.68861 | 0.000227 |
| ENSG00000105492 | SIGLEC6  | 176.7   | -0.68918 | 0.025174 |
| ENSG00000122694 | GLIPR2   | 245.4   | -0.69159 | 0.013497 |
| ENSG00000167930 | FAM234A  | 206.7   | -0.69271 | 0.006435 |
| ENSG00000130598 | TNNI2    | 160.2   | -0.69966 | 0.002739 |
| ENSG00000162241 | SLC25A45 | 1148.9  | -0.7017  | 0.000173 |
| ENSG00000042493 | CAPG     | 1334.4  | -0.703   | 0.005537 |
| ENSG00000155090 | KLF10    | 555.1   | -0.70327 | 0.005145 |
| ENSG00000198712 | MT-CO2   | 41091.6 | -0.70593 | 1.35E-05 |
| ENSG00000139880 | CDH24    | 108.7   | -0.70753 | 0.014682 |
| ENSG00000198840 | MT-ND3   | 14449.5 | -0.70894 | 6.55E-05 |
| ENSG00000188191 | PRKAR1B  | 203.2   | -0.70963 | 0.000193 |
| ENSG00000134333 | LDHA     | 4492.1  | -0.71219 | 0.000698 |
| ENSG00000136026 | CKAP4    | 2444.9  | -0.71397 | 0.000807 |
| ENSG00000135776 | ABCB10   | 2208.9  | -0.71563 | 0.000109 |
| ENSG00000167264 | DUS2     | 2742.6  | -0.71819 | 0.000382 |
| ENSG00000106868 | SUSD1    | 640.9   | -0.7189  | 0.004286 |
| ENSG00000112137 | PHACTR1  | 700.5   | -0.72291 | 0.001594 |
| ENSG00000128604 | IRF5     | 1235.4  | -0.72822 | 0.000111 |
| ENSG00000159399 | HK2      | 612.5   | -0.72823 | 0.003064 |
| ENSG00000197888 | UGT2B17  | 497.6   | -0.73601 | 0.011442 |
| ENSG00000111679 | PTPN6    | 20080.3 | -0.73672 | 0.002301 |
| ENSG00000137571 | SLCO5A1  | 200.1   | -0.73844 | 0.012617 |
| ENSG00000162631 | NTNG1    | 167.2   | -0.74183 | 0.012596 |
| ENSG00000112759 | SLC29A1  | 311.8   | -0.74516 | 0.005104 |
| ENSG00000198176 | TFDP1    | 981.2   | -0.7493  | 0.00033  |
| ENSG00000011590 | ZBTB32   | 1600.7  | -0.75001 | 0.002006 |
| ENSG00000120875 | DUSP4    | 177.1   | -0.75457 | 0.012596 |
| ENSG00000189159 | HN1      | 310.9   | -0.7598  | 0.003223 |
| ENSG00000151014 | NOCT     | 104.6   | -0.76026 | 0.001631 |
| ENSG00000166825 | ANPEP    | 116.9   | -0.76034 | 0.01096  |
| ENSG00000112320 | SOBP     | 240.4   | -0.76493 | 0.008742 |
| ENSG00000130590 | SAMD10   | 142.2   | -0.76948 | 2.63E-05 |
| ENSG00000126246 | IGFLR1   | 234.1   | -0.77108 | 0.004536 |
| ENSG00000187608 | ISG15    | 207.6   | -0.77111 | 0.00442  |
| ENSG00000112149 | CD83     | 2738.7  | -0.7712  | 0.000356 |
| ENSG00000105173 | CCNE1    | 278.2   | -0.77502 | 0.000498 |
| ENSG00000177685 | CRACR2B  | 291.9   | -0.77892 | 0.006966 |
| ENSG00000165996 | HACD1    | 184.0   | -0.78151 | 0.004214 |
| ENSG00000146386 | ABRACL   | 167.3   | -0.7831  | 0.000124 |
| ENSG00000166510 | CCDC68   | 104.3   | -0.7831  | 0.002739 |
| ENSG00000196923 | PDLIM7   | 172.2   | -0.78606 | 0.000373 |
| ENSG00000120708 | TGFBI    | 6427.9  | -0.78821 | 0.003474 |
| ENSG00000104921 | FCER2    | 10884.1 | -0.79264 | 0.000456 |
| ENSG00000124772 | CPNE5    | 1287.3  | -0.79714 | 0.007462 |
| ENSG00000101187 | SLCO4A1  | 576.4   | -0.80239 | 0.003571 |
| ENSG00000188389 | PDCD1    | 199.8   | -0.80712 | 0.000311 |
| ENSG00000130429 | ARPC1B   | 2532.3  | -0.80892 | 0.000172 |
| ENSG00000177697 | CD151    | 158.6   | -0.80894 | 0.00479  |
| ENSG00000128340 | RAC2     | 7805.1  | -0.80898 | 0.000111 |
| ENSG00000065911 | MTHFD2   | 546.1   | -0.81097 | 6.55E-05 |
| ENSG00000183765 | CHEK2    | 570.2   | -0.81124 | 0.00012  |
| ENSG00000226979 | LTA      | 168.3   | -0.81609 | 0.00089  |
| ENSG00000112667 | DNPH1    | 262.9   | -0.81644 | 0.000134 |
| ENSG00000147535 | PLPP5    | 1975.7  | -0.82109 | 0.002926 |
| ENSG00000167483 | FAM129C  | 7332.6  | -0.8311  | 7.53E-05 |
| ENSG00000196189 | SEMA4A   | 2926.0  | -0.83593 | 1.73E-05 |
| ENSG00000049449 | RCN1     | 151.1   | -0.84425 | 0.001429 |

|                 |          |         |          |          |
|-----------------|----------|---------|----------|----------|
| ENSG00000101460 | MAP1LC3A | 724.6   | -0.84758 | 0.00132  |
| ENSG00000141753 | IGFBP4   | 1284.4  | -0.86353 | 0.000111 |
| ENSG00000137460 | FHDC1    | 508.1   | -0.87005 | 1.6E-06  |
| ENSG00000179841 | AKAP5    | 128.3   | -0.87563 | 0.001939 |
| ENSG00000278195 | SSTR3    | 105.5   | -0.87706 | 0.002739 |
| ENSG00000168734 | PKIG     | 1028.3  | -0.87818 | 1.04E-05 |
| ENSG00000011028 | MRC2     | 140.8   | -0.89058 | 0.002266 |
| ENSG00000115956 | PLEK     | 3839.3  | -0.89322 | 9.57E-05 |
| ENSG00000108797 | CNTNAP1  | 1126.8  | -0.89533 | 1.75E-05 |
| ENSG00000175274 | TP53I11  | 927.0   | -0.90588 | 0.000182 |
| ENSG00000158050 | DUSP2    | 547.3   | -0.90817 | 0.0014   |
| ENSG00000048462 | TNFRSF17 | 121.9   | -0.93473 | 0.00026  |
| ENSG00000163599 | CTLA4    | 4363.4  | -0.96152 | 1.84E-05 |
| ENSG00000140678 | ITGAX    | 6410.3  | -0.97909 | 0.000109 |
| ENSG00000102575 | ACP5     | 1331.3  | -1.00003 | 1.65E-05 |
| ENSG00000083454 | P2RX5    | 595.1   | -1.00465 | 3.99E-05 |
| ENSG00000162896 | PIGR     | 1501.0  | -1.01605 | 0.000271 |
| ENSG00000156738 | MS4A1    | 11298.8 | -1.01789 | 7.28E-06 |
| ENSG00000116771 | AGMAT    | 191.1   | -1.02132 | 6.55E-05 |
| ENSG00000168081 | PNOC     | 495.5   | -1.02224 | 3.99E-05 |
| ENSG00000186810 | CXCR3    | 160.7   | -1.03704 | 0.000171 |
| ENSG00000157388 | CACNA1D  | 729.0   | -1.04794 | 0.00015  |
| ENSG00000186818 | LILRB4   | 587.1   | -1.06133 | 9.85E-05 |
| ENSG00000115129 | TP53I3   | 314.2   | -1.06889 | 3.36E-05 |
| ENSG00000189058 | APOD     | 635.5   | -1.06897 | 3.99E-05 |
| ENSG00000064886 | CHI3L2   | 328.7   | -1.07918 | 0.000108 |
| ENSG00000173621 | LRFN4    | 191.2   | -1.11393 | 1.35E-05 |
| ENSG00000239961 | LILRA4   | 511.1   | -1.25426 | 6.95E-07 |

\*250 most up-regulated genes (positive fold change) and 250 most down-regulated genes (negative fold change) during ibrutinib therapy in vivo

Supplemental Table 2: GO term analysis of differentially expressed genes during ibrutinib therapy in vivo

| GO term*   | Description                                                        | P-value  | FDR q-value | Enrichment | N    | B    | n   | b  |
|------------|--------------------------------------------------------------------|----------|-------------|------------|------|------|-----|----|
| GO:0030155 | regulation of cell adhesion                                        | 5.47E-05 | 3.57E-01    | 2.55       | 1010 | 50   | 182 | 23 |
| GO:0007165 | signal transduction                                                | 1.21E-04 | 3.94E-01    | 1.53       | 1010 | 276  | 177 | 74 |
| GO:1904889 | regulation of excitatory synapse assembly                          | 2.59E-04 | 5.63E-01    | 84.17      | 1010 | 2    | 12  | 2  |
| GO:0002250 | adaptive immune response                                           | 2.66E-04 | 4.33E-01    | 2.19       | 1010 | 22   | 378 | 18 |
| GO:2000479 | regulation of cAMP-dependent protein kinase activity               | 3.36E-04 | 4.38E-01    | 17.12      | 1010 | 3    | 59  | 3  |
| GO:0061041 | regulation of wound healing                                        | 3.43E-04 | 3.72E-01    | 6.16       | 1010 | 5    | 164 | 5  |
| GO:0006955 | immune response                                                    | 5.04E-04 | 4.69E-01    | 2.5        | 1010 | 68   | 125 | 21 |
| GO:0042594 | response to starvation                                             | 6.67E-04 | 5.43E-01    | 3          | 1010 | 12   | 281 | 10 |
| GO:0050853 | B cell receptor signaling pathway                                  | 8.70E-04 | 6.30E-01    | 2.43       | 1010 | 10   | 416 | 10 |
| GO:0002768 | immune response-regulating cell surface receptor signaling pathway | 9.52E-04 | 6.20E-01    | 2.44       | 1010 | 37   | 201 | 18 |
| GO:0010677 | negative regulation of cellular carbohydrate metabolic process     | 9.73E-04 | 5.77E-01    | 31.56      | 1010 | 2    | 32  | 2  |
| GO:0045912 | negative regulation of carbohydrate metabolic process              | 9.73E-04 | 5.29E-01    | 31.56      | 1010 | 2    | 32  | 2  |
| GO:0034164 | negative regulation of toll-like receptor 9 signaling pathway      | 9.90E-04 | 4.97E-01    | 1          | 10   | 1010 | 1   | 1  |
| GO:0034156 | negative regulation of toll-like receptor 7 signaling pathway      | 9.90E-04 | 4.61E-01    | 1          | 10   | 1010 | 1   | 1  |
| GO:0034155 | regulation of toll-like receptor 7 signaling pathway               | 9.90E-04 | 4.30E-01    | 1          | 10   | 1010 | 1   | 1  |
| GO:0032687 | negative regulation of interferon-alpha production                 | 9.90E-04 | 4.03E-01    | 1          | 10   | 1010 | 1   | 1  |

\*GO Term analysis was performed by GOrilla online tool and showed GO Terms are referring to group „Processes“.

$$\text{Enrichment} = (b/n) / (B/N)$$

N - is the total number of genes

B - is the total number of genes associated with a specific GO term

n - is the number of genes in the top of the user's input genes

b - is the number of genes in the intersection



Supplemental Table 3: List of genes involved in PI3K/Akt signalling whose expression is changed during ibrutinib therapy in vivo (adjusted P-value < 0.05; base mean > 100).

| Gene ID                | Gene name     | Base Mean<br>(reads per million) | Fold Change<br>(log2)* | Adjusted<br>P-value |
|------------------------|---------------|----------------------------------|------------------------|---------------------|
| ENSG00000049089        | COL9A2        | 7063.7                           | -0.50467               | 0.000111            |
| ENSG00000128340        | RAC2          | 7805.1                           | -0.80898               | 0.000111            |
| <b>ENSG00000150907</b> | <b>FOXO1</b>  | <b>3453</b>                      | <b>0.542957</b>        | <b>0.000456</b>     |
| ENSG00000105173        | CCNE1         | 278.2                            | -0.77502               | 0.000498            |
| ENSG00000100889        | PCK2          | 625.3                            | -0.58965               | 0.001163            |
| ENSG00000033327        | GAB2          | 4616.3                           | 0.539883               | 0.001197            |
| ENSG00000005884        | ITGA3         | 428.5                            | -0.63642               | 0.001649            |
| ENSG00000143384        | MCL1          | 8554.3                           | -0.38992               | 0.003391            |
| ENSG00000132155        | RAF1          | 5603.9                           | 0.235334               | 0.006157            |
| ENSG00000184481        | FOXO4         | 614.5                            | 0.290364               | 0.006424            |
| ENSG00000177455        | CD19          | 10126.7                          | -0.47905               | 0.008917            |
| ENSG00000123374        | CDK2          | 445.8                            | 0.424963               | 0.009086            |
| ENSG00000096384        | HSP90AB1      | 36356.1                          | -0.42299               | 0.018562            |
| ENSG00000077782        | FGFR1         | 535.2                            | -0.6703                | 0.021407            |
| ENSG00000186350        | RXRA          | 2001.6                           | 0.609032               | 0.025436            |
| ENSG00000139626        | ITGB7         | 5095.8                           | -0.4401                | 0.026024            |
| ENSG00000137713        | PPP2R1B       | 1246.5                           | 0.225718               | 0.029029            |
| <b>ENSG00000164327</b> | <b>RICTOR</b> | <b>9290.4</b>                    | <b>0.360697</b>        | <b>0.032784</b>     |
| ENSG00000168477        | TNXB          | 359.7                            | 0.577742               | 0.033591            |
| ENSG00000134460        | IL2RA         | 2330.4                           | 0.493945               | 0.03385             |
| ENSG00000177885        | GRB2          | 9921.5                           | -0.30021               | 0.033857            |
| ENSG00000117020        | AKT3          | 1472.6                           | 0.609996               | 0.035401            |
| ENSG00000177105        | RHOG          | 543                              | -0.46489               | 0.037189            |
| ENSG00000165699        | TSC1          | 5566.1                           | 0.269777               | 0.042556            |
| ENSG00000068971        | PPP2R5B       | 943.3                            | -0.39999               | 0.048169            |

\* positive numbers mean a relative upregulation during ibrutinib therapy in vivo

Used gene sets: Reactome\_Pi3K\_AKT\_signalling\_in\_cancer (no. M27162) and KEGG: PI3K-Akt signaling pathway in Homo sapiens (has04151)

Supplemental Table 4: List of genes that are positively regulated by FoxO1 (36) and upregulated after ibrutinib treatment and genes that are negatively regulated by FoxO1 (36) and downregulated after ibrutinib treatment.

| Gene ID         | Gene name | Base Mean<br>(reads per million) | Fold Change<br>(log2)* | Adjusted<br>P-value |
|-----------------|-----------|----------------------------------|------------------------|---------------------|
| ENSG00000113369 | ARRDC3    | 11321.5                          | 0.602083               | 0.00012             |
| ENSG00000168026 | TTC21A    | 3640.6                           | 0.655718               | 0.000171            |
| ENSG00000112182 | BACH2     | 7294.8                           | 0.569345               | 0.000267            |
| ENSG00000196712 | NF1       | 7960.4                           | 0.535228               | 0.000286            |
| ENSG00000150907 | FOXO1     | 3453                             | 0.542957               | 0.000456            |
| ENSG00000197044 | ZNF441    | 2237                             | 0.665786               | 0.000672            |
| ENSG00000134245 | WNT2B     | 333.6                            | 0.792452               | 0.000904            |
| ENSG00000164754 | RAD21     | 7400.1                           | 0.301939               | 0.001184            |
| ENSG00000100784 | RPS6KA5   | 1372.8                           | 0.451861               | 0.001704            |
| ENSG00000083896 | YTHDC1    | 9892                             | 0.367052               | 0.002776            |
| ENSG00000125827 | TMX4      | 2988.3                           | 0.428564               | 0.002878            |
| ENSG00000133030 | MPRIIP    | 5002                             | 0.412277               | 0.003741            |
| ENSG00000213923 | CSNK1E    | 4612.6                           | 0.541285               | 0.004421            |
| ENSG00000102081 | FMR1      | 7606.5                           | 0.285384               | 0.00479             |
| ENSG00000168944 | CEP120    | 3187.9                           | 0.314058               | 0.006817            |
| ENSG00000145687 | SSBP2     | 1651.8                           | 0.401934               | 0.006836            |
| ENSG00000163346 | PBXIP1    | 6916.4                           | 0.517252               | 0.007653            |
| ENSG00000100629 | CEP128    | 475.9                            | 0.546792               | 0.009957            |
| ENSG00000144645 | OSBPL10   | 6584.8                           | 0.504423               | 0.012967            |
| ENSG00000214413 | BBIP1     | 719.8                            | 0.390755               | 0.014438            |
| ENSG00000198408 | MGEA5     | 26595                            | 0.202157               | 0.016265            |
| ENSG00000135093 | USP30     | 639.8                            | 0.42831                | 0.018571            |
| ENSG00000080839 | RBL1      | 1352.9                           | 0.33874                | 0.019494            |
| ENSG00000184226 | PCDH9     | 8123.5                           | 0.634127               | 0.023167            |
| ENSG00000165029 | ABCA1     | 10492.4                          | 0.581847               | 0.023203            |
| ENSG00000175727 | MLXIP     | 2786.7                           | 0.348421               | 0.023657            |
| ENSG00000004399 | PLXND1    | 1851.8                           | 0.491155               | 0.025615            |
| ENSG00000164327 | RICTOR    | 9290.4                           | 0.360697               | 0.032784            |
| ENSG00000083168 | KAT6A     | 10727.1                          | 0.490613               | 0.036279            |
| ENSG00000076685 | NT5C2     | 4787.5                           | 0.26132                | 0.037234            |
| ENSG00000167703 | SLC43A2   | 1994.7                           | 0.394992               | 0.038795            |
| ENSG00000174469 | CNTNAP2   | 449.5                            | 0.648414               | 0.038996            |
| ENSG00000115464 | USP34     | 33103.1                          | 0.352577               | 0.039517            |
| ENSG00000109790 | KLHL5     | 3082.2                           | 0.424135               | 0.042084            |
| ENSG00000132842 | AP3B1     | 9381.7                           | 0.280561               | 0.042446            |
| ENSG00000165699 | TSC1      | 5566.1                           | 0.269777               | 0.042556            |
| ENSG00000134109 | EDEM1     | 8386.2                           | 0.403641               | 0.042641            |
| ENSG00000104375 | STK3      | 185.8                            | 0.457383               | 0.045992            |
| ENSG00000198625 | MDM4      | 12785.6                          | 0.300532               | 0.047206            |
| ENSG00000104064 | GABPB1    | 3217.5                           | 0.281621               | 0.0495              |
| ENSG00000156738 | MS4A1     | 11298.8                          | -1.01789               | 7.28E-06            |

|                                                                                  |          |         |          |          |
|----------------------------------------------------------------------------------|----------|---------|----------|----------|
| ENSG00000168734                                                                  | PKIG     | 1028.3  | -0.87818 | 1.04E-05 |
| ENSG00000103653                                                                  | CSK      | 6537.2  | -0.54409 | 0.000144 |
| ENSG00000130429                                                                  | ARPC1B   | 2532.3  | -0.80892 | 0.000172 |
| ENSG00000162144                                                                  | CYB561A3 | 5319.5  | -0.68861 | 0.000227 |
| ENSG00000085117                                                                  | CD82     | 2296.9  | -0.56    | 0.001062 |
| ENSG00000051108                                                                  | HERPUD1  | 5129.5  | -0.4679  | 0.003264 |
| ENSG00000028277                                                                  | POU2F2   | 3874.9  | -0.43416 | 0.006532 |
| ENSG00000065485                                                                  | PDIA5    | 146.4   | -0.5178  | 0.006575 |
| ENSG00000197157                                                                  | SND1     | 8736    | -0.23763 | 0.006775 |
| ENSG00000137101                                                                  | CD72     | 1913.9  | -0.60838 | 0.007259 |
| ENSG00000177455                                                                  | CD19     | 10126.7 | -0.47905 | 0.008917 |
| ENSG00000115919                                                                  | KYNU     | 2299.7  | -0.42295 | 0.009957 |
| ENSG00000162631                                                                  | NTNG1    | 167.2   | -0.74183 | 0.012596 |
| ENSG00000137571                                                                  | SLCO5A1  | 200.1   | -0.73844 | 0.012617 |
| ENSG00000172292                                                                  | CERS6    | 485.9   | -0.61863 | 0.018229 |
| ENSG00000197629                                                                  | MPEG1    | 1924.9  | -0.60204 | 0.023444 |
| ENSG00000141337                                                                  | ARSG     | 288.1   | -0.59263 | 0.024351 |
| ENSG00000168275                                                                  | COA6     | 127.5   | -0.43628 | 0.025451 |
| ENSG00000107968                                                                  | MAP3K8   | 1284.4  | -0.42511 | 0.027211 |
| ENSG00000158481                                                                  | CD1C     | 103.5   | -0.64755 | 0.031502 |
| ENSG00000117676                                                                  | RPS6KA1  | 2705.1  | -0.31708 | 0.033419 |
| ENSG00000177885                                                                  | GRB2     | 9921.5  | -0.30021 | 0.033857 |
| ENSG00000054611                                                                  | TBC1D22A | 5574.7  | -0.26855 | 0.033975 |
| * positive numbers mean a relative upregulation during ibrutinib therapy in vivo |          |         |          |          |

Supplemental Table 5: List of top differentially expressed genes during idelalisib therapy in vivo (top 250 upregulated and top 250 downregulated mRNAs)

| Gene ID         | Gene name  | Base Mean (reads per million) | Fold Change (log2)* | Adjusted P-value |
|-----------------|------------|-------------------------------|---------------------|------------------|
| ENSG00000150672 | DLG2       | 769.1                         | 1.264081            | 2.74E-26         |
| ENSG00000179088 | C12orf42   | 445.4                         | 1.185332            | 1.99E-12         |
| ENSG00000204003 | AL355987.1 | 154.5                         | 1.059731            | 2.20E-06         |
| ENSG00000214140 | PRCD       | 302.1                         | 1.051967            | 3.37E-08         |
| ENSG00000102053 | ZC3H12B    | 807.5                         | 1.034461            | 7.18E-15         |
| ENSG00000099958 | DERL3      | 1859.1                        | 1.028104            | 6.48E-10         |
| ENSG00000213923 | CSNK1E     | 8470.1                        | 1.026098            | 1.73E-12         |
| ENSG00000169762 | TAPT1      | 2653.3                        | 0.982449            | 1.65E-17         |
| ENSG00000172794 | RAB37      | 2525.7                        | 0.97666             | 4.68E-10         |
| ENSG00000226742 | HSBP1L1    | 204.4                         | 0.950384            | 1.89E-08         |
| ENSG00000186350 | RXRA       | 3513.3                        | 0.948381            | 1.12E-06         |
| ENSG00000135116 | HRK        | 2536.5                        | 0.928979            | 6.06E-06         |
| ENSG00000196814 | MVB12B     | 223.0                         | 0.897331            | 3.36E-06         |
| ENSG00000108551 | RASD1      | 168.1                         | 0.89666             | 3.81E-05         |
| ENSG00000161036 | LRWD1      | 4437.9                        | 0.893363            | 8.81E-14         |
| ENSG00000121966 | CXCR4      | 62466.9                       | 0.892807            | 9.29E-16         |
| ENSG00000007516 | BAIAP3     | 7823.0                        | 0.886991            | 1.72E-09         |
| ENSG00000120896 | SORBS3     | 1182.3                        | 0.880919            | 1.68E-12         |
| ENSG00000128596 | CCDC136    | 110.9                         | 0.874584            | 6.03E-08         |
| ENSG00000159788 | RGS12      | 184.1                         | 0.848664            | 1.34E-05         |
| ENSG00000185022 | MAFF       | 201.9                         | 0.810917            | 9.23E-05         |
| ENSG00000124074 | ENKD1      | 213.1                         | 0.806044            | 4.50E-05         |
| ENSG00000213231 | TCL1B      | 310.6                         | 0.787017            | 8.21E-06         |
| ENSG00000169435 | RASSF6     | 241.5                         | 0.785385            | 0.000636         |
| ENSG00000174469 | CNTNAP2    | 1772.2                        | 0.785148            | 5.00E-05         |
| ENSG00000099953 | MMP11      | 849.6                         | 0.783706            | 2.63E-05         |
| ENSG0000010278  | CD9        | 173.6                         | 0.779133            | 0.000165         |
| ENSG00000187922 | LCN10      | 1571.6                        | 0.778609            | 0.004124         |
| ENSG00000166348 | USP54      | 436.1                         | 0.770367            | 1.37E-07         |
| ENSG00000182871 | COL18A1    | 7425.0                        | 0.766373            | 0.005436         |
| ENSG00000132003 | ZSWIM4     | 237.3                         | 0.761512            | 1.19E-06         |
| ENSG00000055118 | KCNH2      | 1715.3                        | 0.759768            | 2.92E-10         |
| ENSG00000139112 | GABARAPL1  | 397.7                         | 0.755038            | 1.48E-07         |
| ENSG00000140807 | NKD1       | 162.1                         | 0.754672            | 7.12E-05         |
| ENSG00000118432 | CNR1       | 1558.3                        | 0.749754            | 0.00083          |
| ENSG00000095397 | WHRN       | 5399.2                        | 0.744095            | 9.88E-07         |
| ENSG00000088256 | GNA11      | 200.4                         | 0.740503            | 8.74E-05         |
| ENSG00000204580 | DDR1       | 2066.2                        | 0.738208            | 4.39E-06         |
| ENSG00000158106 | RHPN1      | 587.1                         | 0.734025            | 2.48E-06         |
| ENSG00000204001 | LCN8       | 1360.7                        | 0.728148            | 0.000356         |
| ENSG00000198885 | ITPRIPL1   | 432.5                         | 0.724125            | 0.000244         |
| ENSG00000188026 | RILPL1     | 189.0                         | 0.721395            | 8.70E-07         |
| ENSG00000174175 | SELP       | 1297.6                        | 0.714987            | 2.77E-06         |
| ENSG00000179859 | AC104581.1 | 240.8                         | 0.711447            | 5.37E-07         |
| ENSG00000002587 | HS3ST1     | 1038.7                        | 0.709852            | 0.000277         |
| ENSG00000119900 | OGFRL1     | 1668.2                        | 0.70643             | 2.78E-10         |
| ENSG00000130787 | HIP1R      | 3155.1                        | 0.705077            | 7.54E-06         |
| ENSG00000110944 | IL23A      | 193.9                         | 0.70169             | 5.70E-05         |
| ENSG00000135299 | ANKRD6     | 324.8                         | 0.699331            | 8.69E-06         |
| ENSG00000188747 | NOXA1      | 106.9                         | 0.698524            | 1.53E-05         |
| ENSG00000105948 | TTC26      | 223.5                         | 0.697349            | 7.42E-06         |
| ENSG00000196712 | NF1        | 2244.9                        | 0.696343            | 7.02E-13         |
| ENSG00000112182 | BACH2      | 12531.8                       | 0.693618            | 1.99E-12         |
| ENSG00000171246 | NPTX1      | 2073.7                        | 0.689928            | 7.14E-06         |
| ENSG00000100490 | CDKL1      | 1068.2                        | 0.688818            | 0.000143         |

|                 |                 |         |          |          |
|-----------------|-----------------|---------|----------|----------|
| ENSG00000183397 | C19orf71        | 166.3   | 0.681669 | 5.51E-05 |
| ENSG00000204262 | COL5A2          | 259.6   | 0.675584 | 0.000697 |
| ENSG00000159388 | BTG2            | 20252.0 | 0.675199 | 4.29E-08 |
| ENSG00000126351 | THRA            | 2154.5  | 0.671959 | 1.60E-05 |
| ENSG00000103253 | HAGHL           | 456.4   | 0.670425 | 0.000593 |
| ENSG00000142675 | CNKSRI          | 102.4   | 0.662638 | 0.000801 |
| ENSG00000272398 | CD24            | 11489.4 | 0.660637 | 0.001764 |
| ENSG00000081059 | TCF7            | 1866.8  | 0.659158 | 7.37E-05 |
| ENSG00000102870 | ZNF629          | 267.6   | 0.649431 | 0.000276 |
| ENSG00000111666 | CHPT1           | 1986.1  | 0.648648 | 2.24E-16 |
| ENSG00000173530 | TNFRSF10D       | 782.0   | 0.647348 | 1.27E-05 |
| ENSG00000049246 | PER3            | 262.9   | 0.64729  | 0.000283 |
| ENSG00000157216 | SSBP3           | 539.8   | 0.646527 | 3.53E-05 |
| ENSG00000185112 | FAM43A          | 127.2   | 0.646034 | 0.006203 |
| ENSG00000184897 | H1FX            | 7381.8  | 0.644537 | 0.001708 |
| ENSG00000060138 | YBX3            | 23013.6 | 0.643215 | 5.64E-06 |
| ENSG00000185950 | IRS2            | 989.5   | 0.642416 | 6.35E-05 |
| ENSG00000136161 | RCBTB2          | 235.0   | 0.639198 | 0.000189 |
| ENSG00000120129 | DUSP1           | 16642.5 | 0.638884 | 6.18E-05 |
| ENSG00000071051 | NCK2            | 4007.4  | 0.637784 | 1.26E-06 |
| ENSG00000198832 | SELENOM         | 388.1   | 0.632728 | 3.51E-05 |
| ENSG00000161249 | DMKN            | 373.0   | 0.631    | 0.000596 |
| ENSG00000132510 | KDM6B           | 2378.4  | 0.623355 | 5.17E-07 |
| ENSG00000178075 | GRAMD1C         | 315.8   | 0.622838 | 0.007034 |
| ENSG00000066923 | STAG3           | 664.9   | 0.620669 | 5.22E-07 |
| ENSG00000198324 | FAM109A         | 219.7   | 0.619234 | 0.002089 |
| ENSG00000262621 | AC025283.2      | 162.6   | 0.6162   | 0.000221 |
| ENSG00000166707 | ZCCHC18         | 2168.4  | 0.615462 | 0.000188 |
| ENSG00000273820 | USP27X          | 229.5   | 0.614062 | 0.001775 |
| ENSG00000104064 | GABPB1          | 3426.9  | 0.613887 | 3.79E-20 |
| ENSG00000117318 | ID3             | 2528.1  | 0.613881 | 0.000107 |
| ENSG00000198932 | GPRASP1         | 4427.0  | 0.611997 | 9.48E-10 |
| ENSG00000111266 | DUSP16          | 168.1   | 0.61165  | 0.002757 |
| ENSG00000175727 | MLXIP           | 5277.0  | 0.611606 | 1.26E-06 |
| ENSG00000152495 | CAMK4           | 313.9   | 0.611413 | 0.027955 |
| ENSG00000172071 | EIF2AK3         | 1925.9  | 0.609746 | 5.79E-07 |
| ENSG00000172780 | RAB43           | 2869.9  | 0.605911 | 5.03E-07 |
| ENSG00000134294 | SLC38A2         | 9318.7  | 0.60263  | 2.35E-09 |
| ENSG00000173825 | TIGD3           | 115.3   | 0.597147 | 0.000336 |
| ENSG00000256574 | OR13A1          | 716.1   | 0.596684 | 3.56E-07 |
| ENSG00000162591 | MEGF6           | 5220.6  | 0.592172 | 2.79E-08 |
| ENSG00000084693 | AGBL5           | 733.5   | 0.588711 | 3.23E-06 |
| ENSG00000166532 | RIMKLB          | 1627.1  | 0.587423 | 2.20E-06 |
| ENSG00000103066 | PLA2G15         | 1026.4  | 0.586378 | 4.88E-07 |
| ENSG00000141682 | PMAIP1          | 6367.2  | 0.584374 | 2.54E-09 |
| ENSG00000072364 | AFF4            | 10437.1 | 0.583801 | 3.82E-16 |
| ENSG00000100629 | CEP128          | 218.4   | 0.582022 | 7.96E-07 |
| ENSG00000278535 | DHRS11          | 184.2   | 0.581762 | 0.000422 |
| ENSG00000168675 | LDLRAD4         | 1057.8  | 0.581216 | 1.67E-06 |
| ENSG00000145451 | GLRA3           | 147.5   | 0.578777 | 0.003927 |
| ENSG00000254870 | ATP6V1G2-DDX39B | 298.7   | 0.577889 | 0.005791 |
| ENSG00000165115 | KIF27           | 407.0   | 0.569002 | 9.93E-09 |
| ENSG00000139946 | PELI2           | 629.1   | 0.568391 | 0.000297 |
| ENSG00000112139 | MDGA1           | 1656.1  | 0.567867 | 0.001299 |
| ENSG00000164442 | CITED2          | 386.9   | 0.567848 | 0.006538 |
| ENSG00000131941 | RHPN2           | 395.9   | 0.564424 | 0.003937 |
| ENSG00000108984 | MAP2K6          | 1797.0  | 0.564284 | 2.42E-05 |
| ENSG00000004399 | PLXND1          | 3685.6  | 0.562241 | 2.03E-06 |
| ENSG00000099860 | GADD45B         | 1986.8  | 0.560005 | 0.013255 |
| ENSG00000163001 | CFAP36          | 468.2   | 0.557512 | 6.56E-06 |

|                 |          |         |          |          |
|-----------------|----------|---------|----------|----------|
| ENSG00000122970 | IFT81    | 119.1   | 0.556875 | 0.010623 |
| ENSG00000198369 | SPRED2   | 185.1   | 0.556293 | 0.010899 |
| ENSG00000011275 | RNF216   | 7274.8  | 0.555379 | 3.52E-08 |
| ENSG00000141506 | PIK3R5   | 784.7   | 0.554884 | 0.000441 |
| ENSG00000141013 | GAS8     | 228.4   | 0.553939 | 0.000209 |
| ENSG00000119669 | IRF2BPL  | 1084.9  | 0.553873 | 9.12E-06 |
| ENSG00000101190 | TCFL5    | 591.2   | 0.553024 | 0.000588 |
| ENSG00000132205 | EMILIN2  | 490.9   | 0.552138 | 0.001557 |
| ENSG00000196843 | ARID5A   | 1189.1  | 0.549857 | 0.00084  |
| ENSG00000259384 | GH1      | 123.6   | 0.54956  | 0.008298 |
| ENSG00000118263 | KLF7     | 2059.7  | 0.549276 | 0.002367 |
| ENSG00000164300 | SERINC5  | 4155.4  | 0.548144 | 1.13E-05 |
| ENSG00000116717 | GADD45A  | 233.9   | 0.548081 | 0.003264 |
| ENSG00000007314 | SCN4A    | 442.9   | 0.541399 | 5.49E-05 |
| ENSG00000152518 | ZFP36L2  | 8927.6  | 0.540895 | 1.93E-08 |
| ENSG00000117519 | CNN3     | 161.6   | 0.54063  | 0.010668 |
| ENSG00000101605 | MYOM1    | 626.1   | 0.538838 | 1.17E-05 |
| ENSG00000198879 | SFMBT2   | 1160.3  | 0.538161 | 0.000534 |
| ENSG00000187824 | TMEM220  | 158.4   | 0.536399 | 0.00548  |
| ENSG00000164136 | IL15     | 403.4   | 0.535979 | 0.00268  |
| ENSG00000196476 | C20orf96 | 322.7   | 0.533349 | 0.006158 |
| ENSG00000176714 | CCDC121  | 113.8   | 0.531971 | 0.020243 |
| ENSG00000164938 | TP53INP1 | 6538.3  | 0.531357 | 0.02476  |
| ENSG00000168026 | TTC21A   | 4283.3  | 0.530847 | 1.56E-11 |
| ENSG00000104081 | BMF      | 19738.4 | 0.530439 | 3.37E-08 |
| ENSG00000182022 | CHST15   | 7986.3  | 0.528256 | 1.76E-06 |
| ENSG00000131042 | LILRB2   | 1427.3  | 0.528106 | 2.53E-07 |
| ENSG00000162063 | CCNF     | 147.4   | 0.527767 | 0.000797 |
| ENSG00000125844 | RRBP1    | 6840.6  | 0.525922 | 0.006079 |
| ENSG00000134109 | EDEM1    | 12857.7 | 0.525088 | 4.48E-12 |
| ENSG00000169962 | TAS1R3   | 331.4   | 0.523804 | 0.012107 |
| ENSG00000107902 | LHPP     | 1652.6  | 0.52136  | 0.043163 |
| ENSG00000126091 | ST3GAL3  | 423.4   | 0.520776 | 1.40E-06 |
| ENSG00000127528 | KLF2     | 4505.1  | 0.518945 | 0.000546 |
| ENSG00000159433 | STARD9   | 4440.5  | 0.518695 | 0.000127 |
| ENSG00000198467 | TPM2     | 259.2   | 0.518147 | 0.003997 |
| ENSG00000120832 | MTERF2   | 563.2   | 0.517093 | 0.003927 |
| ENSG00000196584 | XRCC2    | 106.4   | 0.51582  | 0.016507 |
| ENSG00000104866 | PPP1R37  | 1206.5  | 0.514182 | 0.000172 |
| ENSG00000145990 | GFOD1    | 4841.9  | 0.514161 | 6.82E-06 |
| ENSG00000165113 | GKAP1    | 338.8   | 0.513645 | 0.000475 |
| ENSG00000170915 | PAQR8    | 796.7   | 0.512645 | 0.013945 |
| ENSG00000152465 | NMT2     | 271.6   | 0.512163 | 2.13E-05 |
| ENSG00000133302 | SLF1     | 451.9   | 0.511666 | 0.000638 |
| ENSG00000109787 | KLF3     | 929.0   | 0.511655 | 0.00136  |
| ENSG00000196275 | GTF2IRD2 | 1706.9  | 0.510052 | 7.14E-11 |
| ENSG00000156313 | RPGR     | 564.0   | 0.509769 | 5.29E-05 |
| ENSG00000131375 | CAPN7    | 2474.6  | 0.509167 | 1.18E-05 |
| ENSG00000125740 | FOSB     | 24529.8 | 0.507647 | 0.016365 |
| ENSG00000182324 | KCNJ14   | 117.0   | 0.507273 | 0.000634 |
| ENSG00000138606 | SHF      | 124.1   | 0.507    | 0.013488 |
| ENSG00000171223 | JUNB     | 10594.2 | 0.5057   | 0.023617 |
| ENSG00000255150 | EID3     | 539.6   | 0.504443 | 0.000301 |
| ENSG00000142188 | TMEM50B  | 2192.2  | 0.503791 | 9.78E-10 |
| ENSG00000111886 | GABRR2   | 206.9   | 0.50234  | 0.000741 |
| ENSG00000189057 | FAM111B  | 1802.4  | 0.501564 | 0.031736 |
| ENSG00000128011 | LRFN1    | 113.4   | 0.501298 | 0.011449 |
| ENSG00000157514 | TSC22D3  | 45655.7 | 0.499516 | 0.002299 |
| ENSG00000126368 | NR1D1    | 370.5   | 0.499498 | 0.008351 |
| ENSG00000005206 | SPPL2B   | 3205.9  | 0.499387 | 6.94E-05 |

|                 |            |         |          |          |
|-----------------|------------|---------|----------|----------|
| ENSG00000258539 | AC068896.1 | 287.8   | 0.497951 | 0.002073 |
| ENSG00000167393 | PPP2R3B    | 1287.3  | 0.497228 | 0.000613 |
| ENSG00000124126 | PREX1      | 10888.3 | 0.496943 | 2.28E-05 |
| ENSG00000001167 | NFYA       | 2961.1  | 0.496843 | 3.19E-06 |
| ENSG00000184271 | POU6F1     | 1323.8  | 0.496509 | 7.22E-08 |
| ENSG00000196172 | ZNF681     | 484.9   | 0.495694 | 0.016036 |
| ENSG00000221968 | FADS3      | 2652.9  | 0.494424 | 9.24E-06 |
| ENSG00000160961 | ZNF333     | 1539.8  | 0.493527 | 4.13E-06 |
| ENSG00000039523 | RIPOR1     | 9765.4  | 0.491621 | 1.32E-06 |
| ENSG00000246922 | UBAP1L     | 1346.1  | 0.490126 | 9.51E-05 |
| ENSG00000170345 | FOS        | 15965.3 | 0.488643 | 0.004355 |
| ENSG00000100219 | XBP1       | 2036.0  | 0.488479 | 7.97E-05 |
| ENSG00000133878 | DUSP26     | 202.5   | 0.485069 | 0.004421 |
| ENSG00000106459 | NRF1       | 1288.3  | 0.484947 | 2.19E-09 |
| ENSG00000108557 | RAI1       | 1595.4  | 0.484855 | 0.002929 |
| ENSG00000173950 | XXYL1      | 209.3   | 0.482887 | 0.000368 |
| ENSG00000163346 | PBXIP1     | 8421.0  | 0.482036 | 0.00015  |
| ENSG00000143322 | ABL2       | 1882.0  | 0.480599 | 3.07E-18 |
| ENSG00000131153 | GINS2      | 101.2   | 0.479319 | 0.015811 |
| ENSG00000106537 | TSPAN13    | 343.5   | 0.478074 | 0.005689 |
| ENSG00000106624 | AEBP1      | 4914.0  | 0.477044 | 0.001114 |
| ENSG00000079337 | RAPGEF3    | 9881.2  | 0.474986 | 0.001324 |
| ENSG00000083812 | ZNF324     | 635.2   | 0.474743 | 0.000291 |
| ENSG00000132326 | PER2       | 659.2   | 0.474649 | 0.000653 |
| ENSG00000111752 | PHC1       | 4489.6  | 0.473787 | 1.43E-05 |
| ENSG00000163535 | SGO2       | 133.9   | 0.472138 | 0.022691 |
| ENSG00000169105 | CHST14     | 636.7   | 0.471184 | 0.004331 |
| ENSG00000173334 | TRIB1      | 2058.7  | 0.47104  | 0.028753 |
| ENSG00000165029 | ABCA1      | 2139.4  | 0.470323 | 0.002083 |
| ENSG00000213015 | ZNF580     | 1261.3  | 0.469531 | 2.74E-06 |
| ENSG00000150347 | ARID5B     | 9318.3  | 0.468927 | 0.000499 |
| ENSG00000204569 | PPP1R10    | 3316.4  | 0.468535 | 0.001818 |
| ENSG00000110987 | BCL7A      | 1357.2  | 0.466932 | 0.007058 |
| ENSG00000115109 | EPB41L5    | 597.1   | 0.466734 | 0.005222 |
| ENSG00000196689 | TRPV1      | 598.8   | 0.466718 | 0.000565 |
| ENSG00000166501 | PRKCB      | 45216.1 | 0.466176 | 9.41E-07 |
| ENSG00000174483 | BBS1       | 633.7   | 0.465621 | 0.0002   |
| ENSG00000206530 | CFAP44     | 2376.8  | 0.465528 | 6.64E-06 |
| ENSG00000160223 | ICOSLG     | 5142.0  | 0.465501 | 0.000144 |
| ENSG00000177606 | JUN        | 41371.4 | 0.465068 | 0.044188 |
| ENSG00000139746 | RBM26      | 8840.2  | 0.463598 | 8.53E-09 |
| ENSG00000143669 | LYST       | 10772.8 | 0.461937 | 7.83E-06 |
| ENSG00000144445 | KANSL1L    | 915.7   | 0.461704 | 9.52E-08 |
| ENSG00000123374 | CDK2       | 999.4   | 0.458141 | 6.35E-05 |
| ENSG00000119138 | KLF9       | 3322.0  | 0.457189 | 0.005829 |
| ENSG00000146856 | AGBL3      | 122.5   | 0.456664 | 0.021922 |
| ENSG00000160991 | ORAI2      | 17975.7 | 0.455049 | 0.000136 |
| ENSG00000204388 | HSPA1B     | 1235.2  | 0.454919 | 0.002702 |
| ENSG00000174428 | GTF2IRD2B  | 3156.0  | 0.454321 | 7.23E-14 |
| ENSG00000112144 | ICK        | 1171.1  | 0.454097 | 0.000257 |
| ENSG00000163611 | SPICE1     | 1690.6  | 0.453617 | 5.40E-07 |
| ENSG00000140386 | SCAPER     | 1223.2  | 0.452598 | 6.51E-06 |
| ENSG00000123411 | IKZF4      | 333.7   | 0.450826 | 0.00069  |
| ENSG00000215912 | TTC34      | 307.7   | 0.450401 | 0.010764 |
| ENSG00000121879 | PIK3CA     | 3075.9  | 0.449979 | 3.52E-06 |
| ENSG00000136158 | SPRY2      | 212.7   | 0.44964  | 0.03528  |
| ENSG00000239521 | GATS       | 1218.7  | 0.449615 | 1.18E-05 |
| ENSG00000247315 | ZCCHC3     | 1531.4  | 0.448425 | 5.31E-06 |
| ENSG00000160209 | PDXK       | 1071.5  | 0.447983 | 0.000335 |
| ENSG00000133612 | AGAP3      | 1113.0  | 0.447288 | 0.00025  |

|                 |          |         |          |          |
|-----------------|----------|---------|----------|----------|
| ENSG00000157796 | WDR19    | 3796.3  | 0.447116 | 8.48E-06 |
| ENSG00000165507 | C10orf10 | 603.2   | 0.446465 | 4.20E-05 |
| ENSG00000141665 | FBXO15   | 103.8   | 0.446048 | 0.017762 |
| ENSG00000141425 | RPRD1A   | 1514.1  | 0.445037 | 1.70E-06 |
| ENSG00000135108 | FBXO21   | 2323.9  | 0.444675 | 5.98E-05 |
| ENSG00000133030 | MPRIP    | 8284.5  | 0.444543 | 0.000318 |
| ENSG00000135924 | DNAJB2   | 5086.1  | 0.443562 | 4.45E-10 |
| ENSG00000132842 | AP3B1    | 3593.0  | 0.442942 | 9.82E-05 |
| ENSG00000130304 | SLC27A1  | 340.7   | 0.441619 | 0.013809 |
| ENSG00000136237 | RAPGEF5  | 585.6   | 0.440425 | 0.003621 |
| ENSG00000122126 | OCRL     | 937.8   | 0.440409 | 1.21E-05 |
| ENSG00000242689 | CNTF     | 121.4   | 0.440241 | 0.003265 |
| ENSG00000119280 | C1orf198 | 149.7   | 0.440071 | 0.014846 |
| ENSG00000162430 | SELENON  | 1470.9  | 0.439132 | 0.000406 |
| ENSG00000164691 | TAGAP    | 16638.2 | 0.437756 | 6.22E-05 |
| ENSG00000110448 | CD5      | 3562.7  | -0.57179 | 1.82E-09 |
| ENSG00000104774 | MAN2B1   | 5199.2  | -0.57241 | 2.18E-06 |
| ENSG0000010219  | DYRK4    | 974.4   | -0.57326 | 1.05E-07 |
| ENSG00000198648 | STK39    | 194.7   | -0.57487 | 0.001436 |
| ENSG00000104998 | IL27RA   | 1377.0  | -0.57539 | 6.78E-05 |
| ENSG00000117411 | B4GALT2  | 212.8   | -0.57551 | 2.86E-05 |
| ENSG00000244509 | APOBEC3C | 3975.2  | -0.5759  | 5.43E-11 |
| ENSG00000196296 | ATP2A1   | 174.5   | -0.57749 | 0.004232 |
| ENSG00000077549 | CAPZB    | 2161.9  | -0.57812 | 1.02E-10 |
| ENSG00000164885 | CDK5     | 150.0   | -0.57826 | 0.000317 |
| ENSG00000197879 | MYO1C    | 2447.1  | -0.57885 | 0.007243 |
| ENSG00000145088 | EAF2     | 1264.9  | -0.57923 | 0.000402 |
| ENSG00000136717 | BIN1     | 2057.2  | -0.57996 | 1.41E-07 |
| ENSG00000104921 | FCER2    | 20132.9 | -0.57999 | 1.58E-06 |
| ENSG00000173531 | MST1     | 383.1   | -0.58128 | 0.000101 |
| ENSG00000126264 | HCST     | 640.0   | -0.58147 | 2.40E-06 |
| ENSG00000112137 | PHACTR1  | 908.8   | -0.58237 | 0.00061  |
| ENSG00000155366 | RHOC     | 2003.9  | -0.58606 | 9.68E-05 |
| ENSG00000076604 | TRAF4    | 3512.1  | -0.58608 | 0.003023 |
| ENSG00000023191 | RNH1     | 3987.3  | -0.59136 | 1.99E-12 |
| ENSG00000110002 | VWA5A    | 389.2   | -0.59251 | 8.02E-06 |
| ENSG00000168878 | SFTPB    | 1729.5  | -0.59276 | 3.40E-05 |
| ENSG00000111679 | PTPN6    | 15879.0 | -0.59468 | 2.15E-06 |
| ENSG00000256269 | HMBS     | 431.5   | -0.59702 | 1.95E-07 |
| ENSG00000173621 | LRFN4    | 418.7   | -0.59792 | 0.001331 |
| ENSG00000049192 | ADAMTS6  | 1589.7  | -0.59874 | 2.38E-06 |
| ENSG00000103415 | HMOX2    | 841.3   | -0.60113 | 1.24E-12 |
| ENSG00000125508 | SRMS     | 101.4   | -0.60199 | 0.000187 |
| ENSG00000115919 | KYNU     | 910.3   | -0.60399 | 1.00E-07 |
| ENSG00000101082 | SLA2     | 166.9   | -0.60498 | 0.000567 |
| ENSG00000137936 | BCAR3    | 738.3   | -0.60696 | 8.09E-07 |
| ENSG00000154518 | ATP5G3   | 1393.1  | -0.60835 | 1.72E-08 |
| ENSG00000087266 | SH3BP2   | 6317.9  | -0.61238 | 3.16E-06 |
| ENSG00000166886 | NAB2     | 702.9   | -0.61345 | 0.000258 |
| ENSG00000163808 | KIF15    | 123.6   | -0.61366 | 0.002474 |
| ENSG00000101213 | PTK6     | 131.8   | -0.61367 | 0.00133  |
| ENSG00000170667 | RASA4B   | 366.7   | -0.61375 | 7.39E-06 |
| ENSG00000122862 | SRGN     | 1966.9  | -0.61423 | 5.94E-06 |
| ENSG00000101336 | HCK      | 775.8   | -0.61483 | 0.000745 |
| ENSG00000182866 | LCK      | 3171.9  | -0.6158  | 3.63E-08 |
| ENSG00000136960 | ENPP2    | 446.0   | -0.61683 | 5.94E-05 |
| ENSG00000151413 | NUBPL    | 361.3   | -0.61707 | 1.29E-06 |
| ENSG00000146094 | DOK3     | 2404.5  | -0.61748 | 5.38E-07 |
| ENSG00000125434 | SLC25A35 | 437.9   | -0.61996 | 1.35E-06 |
| ENSG00000111640 | GAPDH    | 16329.2 | -0.62008 | 2.59E-12 |



|                 |            |         |          |          |
|-----------------|------------|---------|----------|----------|
| ENSG00000197043 | ANXA6      | 8322.0  | -0.62071 | 9.33E-10 |
| ENSG00000103187 | COTL1      | 7068.7  | -0.62119 | 9.57E-09 |
| ENSG00000183765 | CHEK2      | 418.9   | -0.62325 | 1.21E-08 |
| ENSG00000122873 | CISD1      | 116.4   | -0.62364 | 0.000467 |
| ENSG00000137959 | IFI44L     | 1237.5  | -0.62492 | 0.031814 |
| ENSG00000111639 | MRPL51     | 680.1   | -0.62522 | 5.92E-08 |
| ENSG00000111816 | FRK        | 131.6   | -0.62605 | 0.002536 |
| ENSG00000112759 | SLC29A1    | 197.6   | -0.62706 | 0.000148 |
| ENSG00000163344 | PMVK       | 461.9   | -0.62962 | 8.13E-15 |
| ENSG00000173208 | ABCD2      | 311.2   | -0.63041 | 1.34E-05 |
| ENSG00000182379 | NXPH4      | 114.2   | -0.63214 | 0.000699 |
| ENSG00000198513 | ATL1       | 144.2   | -0.63282 | 0.000654 |
| ENSG00000126246 | IGFLR1     | 3483.0  | -0.63324 | 1.24E-07 |
| ENSG00000101298 | SNPH       | 132.7   | -0.63356 | 0.000667 |
| ENSG00000163932 | PRKCD      | 2016.2  | -0.63426 | 4.00E-10 |
| ENSG00000111696 | NT5DC3     | 1112.5  | -0.63443 | 5.64E-06 |
| ENSG00000103316 | CRYM       | 112.5   | -0.63706 | 0.00568  |
| ENSG00000062282 | DGAT2      | 207.8   | -0.63946 | 4.91E-05 |
| ENSG00000172575 | RASGRP1    | 592.9   | -0.64093 | 0.001207 |
| ENSG00000157593 | SLC35B2    | 2070.7  | -0.64119 | 1.23E-07 |
| ENSG00000129467 | ADCY4      | 206.6   | -0.64181 | 0.0001   |
| ENSG00000163637 | PRICKLE2   | 142.6   | -0.64268 | 0.005717 |
| ENSG00000173898 | SPTBN2     | 733.1   | -0.64286 | 0.000704 |
| ENSG00000164674 | SYTL3      | 199.2   | -0.64364 | 4.12E-06 |
| ENSG00000125454 | SLC25A19   | 1069.0  | -0.64381 | 9.06E-07 |
| ENSG00000119411 | BSPRY      | 300.5   | -0.64406 | 7.79E-06 |
| ENSG00000152782 | PANK1      | 182.1   | -0.64656 | 0.000336 |
| ENSG00000128604 | IRF5       | 2928.3  | -0.64948 | 1.50E-13 |
| ENSG00000175928 | LRRN1      | 858.9   | -0.6508  | 2.85E-06 |
| ENSG00000048462 | TNFRSF17   | 124.9   | -0.65101 | 0.000982 |
| ENSG00000171314 | PGAM1      | 2966.4  | -0.65173 | 3.44E-10 |
| ENSG00000129595 | EPB41L4A   | 154.9   | -0.65186 | 0.004919 |
| ENSG00000196189 | SEMA4A     | 2240.9  | -0.65261 | 2.40E-06 |
| ENSG00000198720 | ANKRD13B   | 208.4   | -0.65273 | 0.007364 |
| ENSG00000185760 | KCNQ5      | 490.9   | -0.65328 | 0.000433 |
| ENSG00000132185 | FCRLA      | 10220.2 | -0.65624 | 1.16E-08 |
| ENSG00000184924 | PTRHD1     | 451.4   | -0.65654 | 4.51E-08 |
| ENSG00000102174 | PHEX       | 1518.5  | -0.65664 | 8.64E-07 |
| ENSG00000198178 | CLEC4C     | 184.1   | -0.65821 | 0.00111  |
| ENSG00000132718 | SYT11      | 508.2   | -0.66007 | 0.00019  |
| ENSG00000111328 | CDK2AP1    | 308.0   | -0.66179 | 6.10E-05 |
| ENSG00000250151 | ARPC4-TTL3 | 596.6   | -0.6619  | 7.52E-10 |
| ENSG00000239672 | NME1       | 430.3   | -0.66277 | 7.54E-06 |
| ENSG00000120708 | TGFBI      | 6429.0  | -0.66302 | 0.004192 |
| ENSG00000160856 | FCRL3      | 19465.1 | -0.66474 | 0.00226  |
| ENSG00000016391 | CHDH       | 2154.4  | -0.66489 | 0.000462 |
| ENSG00000122694 | GLIPR2     | 438.3   | -0.66722 | 4.43E-09 |
| ENSG00000105173 | CCNE1      | 221.4   | -0.6688  | 0.000966 |
| ENSG00000139626 | ITGB7      | 7507.1  | -0.66886 | 9.34E-08 |
| ENSG00000139880 | CDH24      | 276.6   | -0.66926 | 6.57E-06 |
| ENSG00000102575 | ACP5       | 2508.3  | -0.67043 | 1.45E-07 |
| ENSG00000159399 | HK2        | 377.7   | -0.67158 | 6.22E-05 |
| ENSG00000167483 | FAM129C    | 18097.2 | -0.67167 | 1.13E-06 |
| ENSG00000151689 | INPP1      | 279.9   | -0.67205 | 1.11E-08 |
| ENSG00000267228 | AC012254.2 | 200.5   | -0.67599 | 2.21E-05 |
| ENSG00000166839 | ANKDD1A    | 153.6   | -0.67635 | 0.000168 |
| ENSG00000013016 | EHD3       | 2050.2  | -0.6764  | 6.32E-14 |
| ENSG00000188322 | SBK1       | 180.7   | -0.67728 | 0.000631 |
| ENSG00000160446 | ZDHHC12    | 363.6   | -0.67909 | 4.21E-07 |
| ENSG00000188130 | MAPK12     | 228.7   | -0.68295 | 0.001522 |

|                  |            |         |          |          |
|------------------|------------|---------|----------|----------|
| ENSG00000163406  | SLC15A2    | 1553.5  | -0.68613 | 3.58E-05 |
| ENSG00000140451  | PIF1       | 128.2   | -0.68758 | 4.32E-05 |
| ENSG00000100889  | PCK2       | 1229.8  | -0.68985 | 5.09E-10 |
| ENSG00000173559  | NABP1      | 2005.5  | -0.69392 | 5.25E-05 |
| ENSG00000172824  | CES4A      | 365.1   | -0.69482 | 0.000321 |
| ENSG00000175489  | LRRC25     | 227.5   | -0.69742 | 0.000115 |
| ENSG00000151490  | PTPRO      | 1916.0  | -0.69861 | 5.73E-06 |
| ENSG00000101265  | RASSF2     | 4909.3  | -0.69926 | 4.16E-09 |
| ENSG00000118640  | VAMP8      | 1827.5  | -0.70346 | 1.48E-12 |
| ENSG00000185669  | SNAI3      | 106.6   | -0.70358 | 0.000208 |
| ENSG00000177106  | EPS8L2     | 379.1   | -0.70449 | 3.63E-11 |
| ENSG00000100097  | LGALS1     | 1450.9  | -0.70572 | 4.55E-08 |
| ENSG00000184009  | ACTG1      | 21558.9 | -0.70626 | 4.04E-12 |
| ENSG00000187994  | RINL       | 1741.8  | -0.70654 | 1.21E-08 |
| ENSG00000075240  | GRAMD4     | 476.5   | -0.70894 | 0.000123 |
| ENSG00000163683  | SMIM14     | 2608.4  | -0.71102 | 1.99E-11 |
| ENSG00000087589  | CASS4      | 452.6   | -0.71276 | 1.56E-11 |
| ENSG00000143549  | TPM3       | 11848.6 | -0.7162  | 5.01E-14 |
| ENSG00000187510  | PLEKHG7    | 125.8   | -0.71701 | 0.001058 |
| ENSG00000130598  | TNNI2      | 192.5   | -0.71782 | 2.50E-07 |
| ENSG00000204839  | MROH6      | 184.7   | -0.71806 | 5.29E-05 |
| ENSG00000198715  | GLMP       | 481.8   | -0.71844 | 1.79E-08 |
| ENSG00000109919  | MTCH2      | 635.4   | -0.71886 | 4.77E-18 |
| ENSG00000182489  | XKRX       | 677.3   | -0.72102 | 3.18E-06 |
| ENSG00000159335  | PTMS       | 324.2   | -0.72189 | 7.78E-05 |
| ENSG00000130429  | ARPC1B     | 7039.6  | -0.72606 | 1.98E-09 |
| ENSG00000167264  | DUS2       | 2766.2  | -0.72639 | 1.24E-07 |
| ENSG00000161243  | FBXO27     | 119.3   | -0.72689 | 0.000839 |
| ENSG00000177697  | CD151      | 342.3   | -0.73074 | 3.90E-06 |
| ENSG00000267120  | AD000671.2 | 438.3   | -0.73119 | 1.80E-09 |
| ENSG00000146386  | ABRACL     | 357.5   | -0.73153 | 1.57E-07 |
| ENSG00000100473  | COCH       | 1569.5  | -0.73258 | 6.68E-05 |
| ENSG00000138031  | ADCY3      | 809.8   | -0.73365 | 1.29E-06 |
| ENSG00000156738  | MS4A1      | 21927.1 | -0.73796 | 0.002089 |
| ENSG00000188677  | PARVB      | 615.5   | -0.74081 | 6.90E-13 |
| ENSG00000169413  | RNASE6     | 891.8   | -0.74117 | 0.000114 |
| ENSG00000179388  | EGR3       | 279.6   | -0.74134 | 0.010696 |
| ENSG00000198520  | C1orf228   | 917.3   | -0.7429  | 1.15E-05 |
| ENSG00000005844  | ITGAL      | 3895.8  | -0.74393 | 1.80E-09 |
| ENSG00000108175  | ZMIZ1      | 313.4   | -0.74433 | 9.21E-06 |
| ENSG00000178537  | SLC25A20   | 263.5   | -0.74497 | 8.15E-06 |
| ENSG00000254415  | SIGLEC14   | 286.1   | -0.74578 | 4.11E-08 |
| ENSG00000123360  | PDE1B      | 729.9   | -0.74903 | 6.06E-06 |
| ENSG00000002745  | WNT16      | 335.6   | -0.75136 | 4.02E-05 |
| ENSG00000105808  | RASA4      | 1531.1  | -0.75274 | 2.42E-05 |
| ENSG00000030582  | GRN        | 6008.5  | -0.75631 | 1.54E-10 |
| ENSG00000050438  | SLC4A8     | 257.5   | -0.75936 | 0.000182 |
| ENSG000000089127 | OAS1       | 2421.5  | -0.76141 | 1.29E-07 |
| ENSG00000100577  | GSTZ1      | 580.9   | -0.76224 | 1.98E-09 |
| ENSG00000115129  | TP53I3     | 702.9   | -0.76235 | 0.00022  |
| ENSG00000273047  | AL121845.2 | 143.6   | -0.76266 | 0.000114 |
| ENSG00000177685  | CRACR2B    | 955.4   | -0.76353 | 3.25E-07 |
| ENSG00000115902  | SLC1A4     | 213.9   | -0.76769 | 5.59E-05 |
| ENSG00000184293  | CLECL1     | 1537.6  | -0.76825 | 2.32E-08 |
| ENSG00000177301  | KCNA2      | 167.8   | -0.77062 | 5.28E-05 |
| ENSG00000196975  | ANXA4      | 414.3   | -0.77388 | 5.73E-06 |
| ENSG00000198176  | TFDP1      | 1385.2  | -0.77485 | 5.35E-07 |
| ENSG00000189159  | JPT1       | 385.1   | -0.77487 | 1.05E-07 |
| ENSG00000277632  | CCL3       | 127.6   | -0.77536 | 0.0005   |
| ENSG00000184060  | ADAP2      | 124.6   | -0.77537 | 0.000302 |

|                 |               |         |          |          |
|-----------------|---------------|---------|----------|----------|
| ENSG00000189233 | NUGGC         | 535.5   | -0.77565 | 5.30E-06 |
| ENSG00000196154 | S100A4        | 2739.5  | -0.77616 | 1.50E-10 |
| ENSG00000107833 | NPM3          | 186.6   | -0.77797 | 5.13E-05 |
| ENSG00000183963 | SMTN          | 211.7   | -0.78109 | 1.05E-05 |
| ENSG00000149577 | SIDT2         | 7723.4  | -0.78139 | 7.07E-07 |
| ENSG00000158406 | HIST1H4H      | 184.8   | -0.78378 | 1.83E-05 |
| ENSG00000139625 | MAP3K12       | 315.5   | -0.78507 | 5.79E-07 |
| ENSG00000263961 | C1orf186      | 1921.6  | -0.79285 | 1.45E-13 |
| ENSG00000162407 | PLPP3         | 150.3   | -0.79403 | 0.000112 |
| ENSG00000166510 | CCDC68        | 110.7   | -0.79738 | 0.000115 |
| ENSG00000239732 | TLR9          | 252.8   | -0.80004 | 3.38E-08 |
| ENSG00000142512 | SIGLEC10      | 2827.0  | -0.80161 | 2.25E-12 |
| ENSG00000268041 | AC010616.1    | 133.4   | -0.8027  | 7.55E-07 |
| ENSG00000137460 | FHDC1         | 424.7   | -0.80328 | 2.74E-10 |
| ENSG00000145703 | IQGAP2        | 425.4   | -0.81195 | 9.86E-07 |
| ENSG00000070614 | NDST1         | 1188.4  | -0.81227 | 8.73E-15 |
| ENSG00000112290 | WASF1         | 277.0   | -0.81304 | 1.80E-09 |
| ENSG00000216490 | IFI30         | 1439.0  | -0.81818 | 1.42E-11 |
| ENSG00000181885 | CLDN7         | 118.6   | -0.81849 | 5.52E-06 |
| ENSG00000158050 | DUSP2         | 1370.2  | -0.82005 | 2.67E-06 |
| ENSG00000187912 | CLEC17A       | 6895.8  | -0.82636 | 6.02E-11 |
| ENSG00000077585 | GPR137B       | 197.5   | -0.82689 | 2.84E-06 |
| ENSG00000229474 | PATL2         | 4409.6  | -0.82924 | 2.81E-08 |
| ENSG00000116701 | NCF2          | 1370.1  | -0.83032 | 1.53E-06 |
| ENSG00000115956 | PLEK          | 3176.6  | -0.83213 | 7.10E-08 |
| ENSG00000074416 | MGLL          | 118.0   | -0.83527 | 1.48E-05 |
| ENSG00000065911 | MTHFD2        | 471.3   | -0.8367  | 6.39E-08 |
| ENSG00000111331 | OAS3          | 1143.7  | -0.84136 | 2.90E-08 |
| ENSG00000166689 | PLEKHA7       | 389.1   | -0.84293 | 3.54E-06 |
| ENSG00000222009 | BTBD19        | 126.6   | -0.84661 | 5.64E-06 |
| ENSG00000149591 | TAGLN         | 2521.1  | -0.84865 | 1.75E-07 |
| ENSG00000173366 | AC097637.1    | 373.6   | -0.85104 | 5.84E-08 |
| ENSG00000137101 | CD72          | 2873.5  | -0.85365 | 5.64E-06 |
| ENSG00000083454 | P2RX5         | 2818.7  | -0.85474 | 4.20E-07 |
| ENSG00000196743 | GM2A          | 3341.9  | -0.85588 | 8.73E-15 |
| ENSG00000160712 | IL6R          | 1129.9  | -0.85642 | 7.17E-08 |
| ENSG00000162144 | CYB561A3      | 17336.1 | -0.85899 | 2.67E-10 |
| ENSG00000134955 | SLC37A2       | 283.4   | -0.8595  | 4.88E-07 |
| ENSG00000188191 | PRKAR1B       | 208.3   | -0.86171 | 6.16E-10 |
| ENSG00000042753 | AP2S1         | 640.4   | -0.86594 | 9.78E-24 |
| ENSG00000146215 | CRIP3         | 522.1   | -0.86742 | 4.00E-10 |
| ENSG00000163687 | DNASE1L3      | 146.6   | -0.87189 | 3.36E-05 |
| ENSG00000151651 | ADAM8         | 2642.6  | -0.8729  | 2.84E-09 |
| ENSG00000042493 | CAPG          | 2733.3  | -0.87393 | 3.52E-08 |
| ENSG00000203896 | LIME1         | 309.1   | -0.878   | 7.53E-11 |
| ENSG00000124256 | ZBP1          | 1317.6  | -0.89724 | 1.88E-07 |
| ENSG00000239961 | LILRA4        | 2422.5  | -0.89758 | 0.000109 |
| ENSG00000155846 | PPARGC1B      | 618.6   | -0.89819 | 1.57E-07 |
| ENSG00000155367 | PPM1J         | 442.3   | -0.90049 | 3.54E-06 |
| ENSG00000105492 | SIGLEC6       | 280.4   | -0.90163 | 6.21E-06 |
| ENSG00000142765 | SYTL1         | 6343.6  | -0.90363 | 7.14E-11 |
| ENSG00000162896 | PIGR          | 2648.3  | -0.90923 | 1.08E-05 |
| ENSG00000188389 | PDCD1         | 243.5   | -0.91553 | 3.98E-07 |
| ENSG00000257950 | P2RX5-TAX1BP3 | 117.2   | -0.91961 | 6.15E-07 |
| ENSG00000116771 | AGMAT         | 274.6   | -0.91978 | 1.82E-08 |
| ENSG00000197629 | MPEG1         | 3710.1  | -0.9255  | 1.69E-06 |
| ENSG00000142798 | HSPG2         | 628.7   | -0.929   | 1.69E-07 |
| ENSG00000128340 | RAC2          | 11122.0 | -0.93041 | 6.15E-14 |
| ENSG00000146192 | FGD2          | 6614.3  | -0.93591 | 5.71E-12 |
| ENSG00000141337 | ARSG          | 437.4   | -0.9372  | 7.37E-07 |

|                 |             |        |          |          |
|-----------------|-------------|--------|----------|----------|
| ENSG00000183091 | NEB         | 994.8  | -0.94189 | 2.94E-07 |
| ENSG00000278195 | SSTR3       | 579.9  | -0.944   | 4.13E-06 |
| ENSG00000106868 | SUSD1       | 608.8  | -0.94422 | 4.25E-08 |
| ENSG00000204983 | PRSS1       | 115.4  | -0.94544 | 4.96E-05 |
| ENSG00000108797 | CNTNAP1     | 2209.3 | -0.9472  | 1.10E-09 |
| ENSG00000174123 | TLR10       | 1390.4 | -0.9479  | 1.56E-05 |
| ENSG00000175274 | TP53I11     | 2491.0 | -0.95085 | 8.49E-10 |
| ENSG00000255274 | TMPRSS4-AS1 | 132.0  | -0.97155 | 5.67E-06 |
| ENSG00000124772 | CPNE5       | 3000.0 | -0.97386 | 6.85E-07 |
| ENSG00000133067 | LGR6        | 194.9  | -0.98899 | 1.60E-08 |
| ENSG00000138623 | SEMA7A      | 796.1  | -1.01141 | 7.16E-15 |
| ENSG00000140678 | ITGAX       | 6514.0 | -1.02185 | 1.28E-10 |
| ENSG00000168081 | PNOC        | 1473.0 | -1.03917 | 6.92E-13 |
| ENSG00000179841 | AKAP5       | 191.3  | -1.04161 | 5.10E-07 |
| ENSG00000103089 | FA2H        | 156.6  | -1.04236 | 1.42E-09 |
| ENSG00000129226 | CD68        | 755.8  | -1.05114 | 2.30E-10 |
| ENSG00000158481 | CD1C        | 139.9  | -1.05848 | 6.00E-07 |
| ENSG00000064886 | CHI3L2      | 642.3  | -1.0748  | 1.80E-07 |
| ENSG00000011028 | MRC2        | 209.3  | -1.07719 | 1.78E-07 |
| ENSG00000204396 | VWA7        | 130.5  | -1.09495 | 1.45E-07 |
| ENSG00000166428 | PLD4        | 128.8  | -1.11949 | 1.03E-07 |
| ENSG00000172771 | EFCAB12     | 261.5  | -1.12059 | 1.38E-09 |
| ENSG00000011590 | ZBTB32      | 2725.1 | -1.16681 | 6.32E-14 |
| ENSG00000186810 | CXCR3       | 489.5  | -1.44369 | 7.82E-17 |
| ENSG00000186818 | LILRB4      | 700.2  | -1.72761 | 6.21E-27 |

\*250 most up-regulated genes (positive fold change) and 250 most down-regulated genes (negative fold change) during idelalisib therapy in vivo

Supplemental Table 6: GO term analysis of differentially expressed genes during idelalisib in vivo therapy (top 30 processes)

| GO term*   | Description                                            | P-value  | FDR q-value | Enrichment | N    | B   | n   | b   |
|------------|--------------------------------------------------------|----------|-------------|------------|------|-----|-----|-----|
| GO:0002376 | immune system process                                  | 3.34E-15 | 3.12E-11    | 1.5        | 2755 | 447 | 997 | 243 |
| GO:0002252 | immune effector process                                | 8.35E-14 | 3.90E-10    | 1.73       | 2755 | 233 | 934 | 137 |
| GO:0055086 | nucleobase-containing small molecule metabolic process | 2.20E-12 | 6.86E-09    | 1.93       | 2755 | 127 | 944 | 84  |
| GO:0006955 | immune response                                        | 3.03E-12 | 7.07E-09    | 2.19       | 2755 | 186 | 527 | 78  |
| GO:0006887 | exocytosis                                             | 1.16E-11 | 2.17E-08    | 1.78       | 2755 | 171 | 934 | 103 |
| GO:0044281 | small molecule metabolic process                       | 1.17E-11 | 1.82E-08    | 1.56       | 2755 | 293 | 945 | 157 |
| GO:0045055 | regulated exocytosis                                   | 5.93E-11 | 7.91E-08    | 1.78       | 2755 | 161 | 934 | 97  |
| GO:0046903 | secretion                                              | 1.94E-10 | 2.26E-07    | 1.67       | 2755 | 199 | 934 | 113 |
| GO:0032940 | secretion by cell                                      | 2.14E-10 | 2.22E-07    | 1.69       | 2755 | 188 | 934 | 108 |
| GO:0043299 | leukocyte degranulation                                | 7.11E-10 | 6.64E-07    | 1.83       | 2755 | 127 | 934 | 79  |
| GO:0022610 | biological adhesion                                    | 7.56E-10 | 6.42E-07    | 2.66       | 2755 | 106 | 439 | 45  |
| GO:0007155 | cell adhesion                                          | 7.56E-10 | 5.88E-07    | 2.66       | 2755 | 106 | 439 | 45  |
| GO:0006753 | nucleoside phosphate metabolic process                 | 1.05E-09 | 7.57E-07    | 1.88       | 2755 | 110 | 944 | 71  |
| GO:0009117 | nucleotide metabolic process                           | 1.14E-09 | 7.60E-07    | 1.89       | 2755 | 108 | 944 | 70  |
| GO:0002275 | myeloid cell activation involved in immune response    | 1.20E-09 | 7.45E-07    | 1.82       | 2755 | 130 | 934 | 80  |
| GO:0002682 | regulation of immune system process                    | 1.97E-09 | 1.15E-06    | 1.75       | 2755 | 333 | 496 | 105 |
| GO:0002274 | myeloid leukocyte activation                           | 2.23E-09 | 1.23E-06    | 1.77       | 2755 | 142 | 934 | 85  |

|            |                                                   |          |          |      |      |     |     |     |
|------------|---------------------------------------------------|----------|----------|------|------|-----|-----|-----|
| GO:0006952 | defense response                                  | 2.52E-09 | 1.31E-06 | 2.02 | 2755 | 191 | 522 | 73  |
| GO:0044282 | small molecule catabolic process                  | 2.58E-09 | 1.27E-06 | 2.04 | 2755 | 88  | 874 | 57  |
| GO:0002366 | leukocyte activation involved in immune response  | 3.84E-09 | 1.80E-06 | 1.72 | 2755 | 154 | 934 | 90  |
| GO:0002263 | cell activation involved in immune response       | 3.84E-09 | 1.71E-06 | 1.72 | 2755 | 154 | 934 | 90  |
| GO:0051186 | cofactor metabolic process                        | 4.63E-09 | 1.96E-06 | 1.91 | 2755 | 98  | 944 | 64  |
| GO:0002283 | neutrophil activation involved in immune response | 5.02E-09 | 2.04E-06 | 1.81 | 2755 | 122 | 934 | 75  |
| GO:0045321 | leukocyte activation                              | 7.53E-09 | 2.93E-06 | 1.55 | 2755 | 216 | 997 | 121 |
| GO:0043312 | neutrophil degranulation                          | 9.64E-09 | 3.60E-06 | 1.8  | 2755 | 121 | 934 | 74  |
| GO:0002683 | negative regulation of immune system process      | 1.21E-08 | 4.34E-06 | 2.67 | 2755 | 79  | 496 | 38  |
| GO:0007165 | signal transduction                               | 1.44E-08 | 4.97E-06 | 1.34 | 2755 | 720 | 718 | 251 |
| GO:0036230 | granulocyte activation                            | 2.30E-08 | 7.69E-06 | 1.77 | 2755 | 127 | 934 | 76  |
| GO:0042119 | neutrophil activation                             | 2.51E-08 | 8.10E-06 | 1.77 | 2755 | 125 | 934 | 75  |
| GO:1901135 | carbohydrate derivative metabolic process         | 3.61E-08 | 1.12E-05 | 1.66 | 2755 | 162 | 944 | 92  |

\*GO Term analysis was performed by GOrilla online tool and showed GO Terms are referring to group „Processes“.

$$\text{Enrichment} = (b/n) / (B/N)$$

N - is the total number of genes

B - is the total number of genes associated with a specific GO term

n - is the number of genes in the top of the user's input genes

b - is the number of genes in the intersection

Supplemental Table 7: List of genes involved in PI3K/Akt signalling whose expression is changed during idelalisib therapy in vivo (adjusted P-value < 0.05; base mean > 100).

| Gene ID                | Gene name*           | Base Mean<br>(reads per million) | Fold Change<br>(log2)** | Adjusted P-value |
|------------------------|----------------------|----------------------------------|-------------------------|------------------|
| ENSG00000128340        | <u>RAC2</u>          | 11122                            | -0.93041                | 6.15E-14         |
| ENSG00000100889        | <u>PCK2</u>          | 1230                             | -0.68985                | 5.09E-10         |
| ENSG00000182866        | LCK                  | 3171.9                           | -0.6158                 | 3.63E-08         |
| ENSG00000160712        | IL6R                 | 1129.9                           | -0.85642                | 7.17E-08         |
| ENSG00000139626        | <u>ITGB7</u>         | 7507.1                           | -0.66886                | 9.34E-08         |
| ENSG00000186350        | <u>RXRA</u>          | 3513.3                           | 0.948381                | 1.12E-06         |
| ENSG00000141968        | VAV1                 | 3215.8                           | -0.44028                | 1.76E-06         |
| ENSG00000111276        | CDKN1B               | 3643.5                           | 0.423518                | 3.18E-06         |
| ENSG00000121879        | PIK3CA               | 3075.9                           | 0.449979                | 3.52E-06         |
| ENSG00000068971        | <u>PPP2R5B</u>       | 1110.1                           | -0.546                  | 4.19E-06         |
| ENSG00000104812        | GYS1                 | 1845.1                           | -0.38716                | 5.37E-06         |
| ENSG00000213231        | TCL1B                | 310.6                            | 0.787017                | 8.21E-06         |
| ENSG00000184574        | LPAR5                | 1252.6                           | -0.37624                | 1.12E-05         |
| ENSG00000118046        | STK11                | 2676.8                           | 0.375179                | 3.52E-05         |
| ENSG00000096968        | JAK2                 | 3725.7                           | -0.4422                 | 6.11E-05         |
| ENSG00000123374        | <u>CDK2</u>          | 999.4                            | 0.458141                | 6.35E-05         |
| ENSG00000185950        | IRS2                 | 989.5                            | 0.642416                | 6.35E-05         |
| ENSG00000134460        | <u>IL2RA</u>         | 3207.5                           | 0.401875                | 8.85E-05         |
| ENSG00000109458        | GAB1                 | 5219.9                           | 0.405891                | 0.000114         |
| ENSG00000105568        | PPP2R1A              | 3756.9                           | -0.28079                | 0.000128         |
| <b>ENSG00000150907</b> | <b><u>FOXO1</u></b>  | <b>4549.6</b>                    | <b>0.434655</b>         | <b>0.000148</b>  |
| ENSG00000177105        | <u>RHOG</u>          | 936.9                            | -0.4025                 | 0.000176         |
| ENSG00000174021        | GNG5                 | 655                              | -0.40449                | 0.000204         |
| ENSG00000118971        | CCND2                | 1816.6                           | -0.37347                | 0.000229         |
| ENSG00000141564        | RPTOR                | 1430.9                           | 0.372897                | 0.000244         |
| ENSG00000166225        | FRS2                 | 1623.4                           | 0.295375                | 0.000285         |
| ENSG00000141506        | PIK3R5               | 784.7                            | 0.554884                | 0.000441         |
| ENSG00000186469        | GNG2                 | 3191.1                           | -0.29361                | 0.000534         |
| ENSG00000167393        | PPP2R3B              | 1287.3                           | 0.497228                | 0.000613         |
| ENSG00000132155        | <u>RAF1</u>          | 6238.8                           | 0.184951                | 0.000946         |
| ENSG00000105173        | <u>CCNE1</u>         | 221.4                            | -0.6688                 | 0.000966         |
| ENSG00000176533        | GNG7                 | 3677.1                           | 0.31371                 | 0.001003         |
| ENSG00000033327        | <u>GAB2</u>          | 8219.8                           | 0.214818                | 0.003197         |
| <b>ENSG00000164327</b> | <b><u>RICTOR</u></b> | <b>4947</b>                      | <b>0.282368</b>         | <b>0.00398</b>   |
| ENSG00000112640        | PPP2R5D              | 1288.4                           | -0.19388                | 0.003992         |
| ENSG00000118689        | FOXO3                | 1653.9                           | 0.354737                | 0.004963         |
| ENSG00000100385        | IL2RB                | 611.3                            | -0.47867                | 0.005409         |
| ENSG00000105401        | CDC37                | 8694.9                           | 0.177377                | 0.005409         |
| ENSG00000187840        | EIF4EBP1             | 249.2                            | -0.35914                | 0.005551         |
| ENSG00000114013        | CD86                 | 1309.1                           | -0.33558                | 0.00713          |
| ENSG00000259384        | GH1                  | 123.6                            | 0.54956                 | 0.008298         |
| ENSG00000135930        | EIF4E2               | 2228.7                           | -0.24923                | 0.009772         |

|                 |              |         |          |          |
|-----------------|--------------|---------|----------|----------|
| ENSG00000137154 | RPS6         | 76400   | 0.129004 | 0.009857 |
| ENSG00000170962 | PDGFD        | 606.5   | -0.37458 | 0.010081 |
| ENSG00000161638 | ITGA5        | 578.1   | 0.429797 | 0.01013  |
| ENSG00000198793 | MTOR         | 5071.1  | 0.174079 | 0.011327 |
| ENSG00000143384 | <u>MCL1</u>  | 15436.3 | -0.23623 | 0.011693 |
| ENSG00000165699 | <u>TSC1</u>  | 6041.1  | 0.154885 | 0.011865 |
| ENSG00000166913 | YWHAB        | 6444.4  | -0.19701 | 0.013244 |
| ENSG00000135424 | ITGA7        | 107.1   | -0.45908 | 0.013809 |
| ENSG00000130702 | LAMA5        | 4845.7  | -0.32616 | 0.013867 |
| ENSG00000184481 | <u>FOXO4</u> | 1489.1  | 0.266427 | 0.017169 |
| ENSG00000128272 | ATF4         | 15688.5 | 0.214615 | 0.018133 |
| ENSG00000115966 | ATF2         | 1832.6  | 0.161379 | 0.022351 |
| ENSG00000167965 | MLST8        | 901.3   | -0.24166 | 0.027679 |
| ENSG00000108443 | RPS6KB1      | 1754.1  | 0.189615 | 0.028005 |
| ENSG00000069966 | GNB5         | 3948.7  | 0.215486 | 0.028932 |
| ENSG00000175470 | PPP2R2D      | 1372.3  | 0.208787 | 0.033285 |
| ENSG00000136869 | TLR4         | 154.5   | -0.4825  | 0.034567 |
| ENSG00000121594 | CD80         | 111.4   | -0.45781 | 0.038368 |

\* underlined genes were changed during ibrutinib therapy in vivo as well

\*\* positive numbers mean a relative upregulation during idelalisib therapy in vivo

Used gene sets: Reactome\_PI3K\_AKT\_signalling\_in\_cancer (no. M27162) and KEGG: PI3K-Akt signaling pathway in Homo sapiens (has04151)



Supplemental Table 8: Characteristics of CLL patients

| No. | Used in figure            | Gender * | Age at the time of diagnosis | Rai stage (at sample collection) | del17p13 (%) | del11q23 (%) | trisomy 12 (%) | del13q14 (%) | IgHv status | % of IgHV homology | TP53    | Treat-ment ** | Timepoints for RNAseq if applicable | Proteins detected (A=Akt, R=Rictor, F=FoxO1) |        |        |        |                                        |            |
|-----|---------------------------|----------|------------------------------|----------------------------------|--------------|--------------|----------------|--------------|-------------|--------------------|---------|---------------|-------------------------------------|----------------------------------------------|--------|--------|--------|----------------------------------------|------------|
|     |                           |          |                              |                                  |              |              |                |              |             |                    |         |               |                                     | pre-therapy                                  | week 1 | week 2 | week 4 | week 6-8 (data not shown for A in ibr) | week 11-12 |
| 1   | 1B, 1E, 2D, S1A, S1B, S1D | M        | 59                           | IV                               | neg          | neg          | neg            | pos(80)      | mut         | 96.26              | wt      | ibr           |                                     | A, R                                         |        |        | A, R   |                                        |            |
| 2   | 2D                        | M        | 57                           | I                                | neg          | neg          | neg            | neg          | unmut       | 98.26              | wt      | ibr           |                                     | A, R                                         |        |        | A, R   |                                        | A, R       |
| 3   | 2D                        | F        | 48                           | I                                | neg          | pos(90)      | neg            | pos(95)      | unmut       | 100                | wt      | ibr           |                                     | A, R                                         |        |        | A, R   |                                        | A, R       |
| 4   | 1B, 1E, 2D, S1A, S1B, S1D | M        | 60                           | I                                | pos(15)      | neg          | pos(91)        | neg          | unmut       | 100                | mut/del | ibr           |                                     | A, R                                         |        |        | A, R   |                                        | A, R       |
| 5   | 1B, 1E, 2D, S1A, S1B, S1D | M        | 66                           | 0                                | neg          | neg          | neg            | pos(79)      | mut         | 91.03              | wt      | ibr           |                                     | A, R                                         |        |        | A, R   |                                        | A, R       |
| 6   | 1B, 1E, 2D, S1A, S1B, S1D | M        | 73                           | 0                                | neg          | neg          | neg            | pos(49)      | mut         | 97.37              | wt      | ibr           |                                     | A, R                                         |        |        | A, R   |                                        | A, R       |
| 7   | 1B, 1E, 2D, S1A, S1B, S1D | M        | 65                           | I                                | pos(58)      | neg          | neg            | neg          | unmut       | 100                | mut/del | ibr           |                                     | A, R                                         |        |        | A, R   |                                        | A, R       |
| 8   | 1B, 1E, 2D, S1A, S1B, S1D | M        | 61                           | II                               | neg          | pos(95)      | neg            | neg          | unmut       | 100                | wt      | ibr           |                                     | A, R                                         |        |        | A, R   |                                        | A, R       |
| 9   | 1B, 1E, 2D, S1A, S1B, S1D | M        | 67                           | 0                                | neg          | neg          | neg            | pos(89)      | mut         | 97.59              | wt      | ibr           |                                     | A, R                                         |        |        | A, R   |                                        | A, R       |
| 10  | 1B, 1E, 2D, S1A, S1B, S1D | M        | 72                           | I                                | neg          | pos(90)      | neg            | neg          | unmut       | 100                | wt      | ibr           |                                     | A, R                                         |        |        | A, R   |                                        | A, R       |
| 11  | 1B, 1E, 2D, S1A, S1B, S1D | M        | 48                           | I                                | neg          | pos(99)      | neg            | neg          | unmut       | 100                | wt      | ibr           |                                     | A, R                                         |        |        | A, R   |                                        | A, R       |
| 12  | 1B, 1E, 2D, S1A, S1B, S1D | F        | 72                           | IV                               | pos(70)      | neg          | neg            | neg          | mut         | 93.88              | mut/del | ibr           |                                     | A, R                                         |        |        | A, R   |                                        | A, R       |

|    |                                                             |   |    |       |          |          |          |          |       |       |         |     |                 |         |   |            |            |   |            |
|----|-------------------------------------------------------------|---|----|-------|----------|----------|----------|----------|-------|-------|---------|-----|-----------------|---------|---|------------|------------|---|------------|
| 13 | 2D, 3B,<br>S1C, S4                                          | M | 67 | IA    | neg      | pos (86) | neg      | pos (11) | unmut | 100   | wt      | ibr |                 | A, R, F |   |            | A, R,<br>F |   |            |
| 14 | 2D, 3B, S4                                                  | M | 43 | ND    | neg      | pos (96) | pos (80) | neg      | unmut | 100   | wt      | ibr |                 | A, R, F | A | A          | A, R,<br>F |   | A          |
| 15 | 1B, 1E, 2A,<br>3A, 3B,<br>S1A, S1B,<br>S1D                  | M | 57 | ND    | neg      | pos (12) | neg      | pos (84) | mut   | 93.8  | wt      | ibr | pre, day 15     | A, F    |   | A          | A, F       |   |            |
| 16 | 1B, 1E, 2A,<br>2D, 3B,<br>S1A, S1B,<br>S1D, S4              | M | 64 | III B | neg      | neg      | neg      | neg      | unmut | 100   | wt      | ibr | pre, week 9     | A, R, F | A | A          | A, R,<br>F |   | A          |
| 17 | 1A, 1B, 1E,<br>2D, 3B,<br>6G, S1B,<br>S1C, S1D,<br>S4, S14B | M | 67 | ND    | neg      | pos (95) | neg      | neg      | unmut | 100   | wt      | ibr |                 | A, R, F |   | A, R,<br>F |            | A | A          |
| 18 | 1B, 1E, 2D,<br>3B, S1B,<br>S1D, S4,<br>S14B                 | M | 52 | IVA   | neg      | neg      | neg      | neg      | unmut | 100   | wt      | ibr |                 | A, R, F |   |            | A, R,<br>F |   | A          |
| 19 | 2A                                                          | M | 34 | I     | pos (16) | neg      | neg      | neg      | mut   | 96.6  | mut/del | ibr | pre, day 15     |         |   |            |            |   |            |
| 20 | 2A                                                          | F | 51 | IV    | neg      | neg      | pos (52) | neg      | unmut | 100   | ND      | ibr | pre, day 15     |         |   |            |            |   |            |
| 21 | 2A                                                          | M | 75 | I     | neg      | neg      | neg      | pos (79) | mut   | 96.6  | ND      | ibr | pre, week<br>12 |         |   |            |            |   |            |
| 22 | 2A                                                          | M | 56 | I     | pos (36) | neg      | neg      | pos (5)  | unmut | 100   | mut/del | ibr | pre, week 5     |         |   |            |            |   |            |
| 23 | 2A                                                          | F | 67 | IV    | pos (94) | pos (94) | neg      | neg      | unmut | 100   | mut/del | ibr | pre, week 5     |         |   |            |            |   |            |
| 24 | 1B, 2D, 3B,<br>S1A, S1B,<br>S4, S14B                        | M | 58 | ND    | pos (90) | neg      | neg      | pos (60) | mut   | 92.27 | mut/del | ibr |                 | A, R, F |   | A, R,<br>F |            |   |            |
| 25 | 2D, 3B,<br>S1C, S4                                          | F | 68 | IV    | neg      | neg      | neg      | neg      | unmut | 98.24 | mut     | ibr |                 | A       |   |            |            |   | A, R,<br>F |
| 26 | 1B, 1E, 2D,<br>3A, 3B,<br>S1B, S1D,<br>S4                   | M | 51 | IVA   | neg      | neg      | neg      | neg      | unmut | 100   | wt      | ibr |                 | A, R, F |   |            | A, R,<br>F | A |            |
| 27 | 2D, 3B,<br>S1C, S4                                          | F | 64 | ND    | neg      | neg      | neg      | pos (8)  | mut   | 91.6  | wt      | ibr |                 | A, R, F | A | A          | A, R,<br>F | A |            |
| 28 | 2D, 3B,<br>6G, S1C,<br>S4                                   | F | 76 | IIIB  | neg      | pos (18) | neg      | neg      | unmut | 99.66 | wt      | ibr |                 | R       |   |            | R, F       |   |            |
| 30 | 2D, 3B,<br>S1C, S4                                          | M | 48 | IVB   | neg      | neg      | neg      | pos (85) | unmut | 100   | wt      | ibr |                 | A, R, F | A |            | A, R,<br>F |   |            |

|    |                                            |   |         |     |            |          |     |           |       |       |         |     |             |         |   |         |         |   |         |   |
|----|--------------------------------------------|---|---------|-----|------------|----------|-----|-----------|-------|-------|---------|-----|-------------|---------|---|---------|---------|---|---------|---|
| 31 | 1B, 1E, 2D, 3B, 6G, S1A, S1B, S1C, S1D, S4 | F | 45      | III | pos (100)  | neg      | neg | pos (100) | mut   | 95.14 | mut/del | ibr |             | A, R    |   |         |         |   | A, R, F |   |
| 32 | 1B, 1E, 1E, 2D, 3B, S1A, S1B, S1C, S1D, S4 | M | 37      | ND  | pos (85)   | pos (95) | neg | pos (14)  | unmut | 100   | mut/del | ibr |             | A, R, F |   |         | A, R, F |   | A       |   |
| 33 | 1E, 2D, 3B, S1C, S4, S14B                  | F | 47      | ND  | neg        | neg      | neg | neg       | unmut | ND    | wt      | ibr |             | A, R, F |   |         | A, R, F |   |         |   |
| 34 | 1B, 1E, 1F, 2D, 3B, S1A, S1B, S1C, S1D, S4 | F | unknown | ND  | pos        | neg      | neg | pos       | mut   | 89.47 | mut     | ibr |             | A, R, F |   |         | A, R, F |   |         |   |
| 35 | 1F, 2D, 3B, 6G, S1C, S4                    | M | 64      | IIB | neg        | pos (92) | neg | pos (96)  | unmut | 100   | wt      | ibr |             | A, R, F |   |         | A, R, F | A |         |   |
| 36 | 1A, 3B                                     | M | 57      | IV  | pos (60.5) | neg      | neg | pos (96)  | mut   | 92.18 | mut/del | ibr |             | A, F    |   | A, F    |         |   | A       |   |
| 37 | 2D, 3B, 7F, G, S1C, S4, S11B               | M | 34      | IA  | neg        | pos (74) | neg | pos (15)  | unmut | 100   | mut     | ibr |             | A, R, F | A | A       | A, R, F | A | A       |   |
| 38 | 1B, 1E, 3B, S1A, S1B, S1D                  | M | 39      | IVB | pos (12)   | pos (85) | neg | pos (15)  | unmut | 100   | mut/del | ibr |             | A, R, F | A | A       | A, R, F | A |         |   |
| 39 | 1B, 1E, 2A, 2D, 3B, S1A, S1B, S1D, S4      | M | 59      | IVB | neg        | pos (80) | neg | pos (83)  | unmut | 100   | wt      | ibr |             | A, R, F | A | A       | A, R, F |   |         |   |
| 40 | 1B, 1E, 2C, 2D, 3B, S1A, S1B, S1C, S1D, S4 | M | 56      | ND  | pos (62)   | neg      | neg | pos (64)  | unmut | 100   | mut/del | ibr | pre, day 14 | A, R, F |   | A       |         |   | A, R, F | A |
| 41 | 1B, 1E, 2D, 3B, S1A, S1B, S1C, S1D, S4     | M | 51      | IA  | neg        | neg      | neg | pos (88)  | unmut | 98.6  | wt      | ibr |             | A, R, F |   | A, R, F |         |   |         |   |
| 42 | 1B, 1E, 1F, 2D, 3B, S1A, S1B,              | M | 66      | IVA | pos (18)   | neg      | neg | neg       | unmut | 100   | mut/del | ibr |             | A, R, F |   |         | A, R, F |   |         |   |

|    |                                                |   |    |      |          |          |          |          |                   |              |         |     |             |         |   |         |         |         |  |
|----|------------------------------------------------|---|----|------|----------|----------|----------|----------|-------------------|--------------|---------|-----|-------------|---------|---|---------|---------|---------|--|
|    | S1C, S1D, S4                                   |   |    |      |          |          |          |          |                   |              |         |     |             |         |   |         |         |         |  |
| 43 | 1A, 1B, 1E, 2A, 3B, S1A, S1D                   | F | 63 | ND   | neg      | pos (31) | neg      | pos (85) | biclon            | 100; 95.3    | wt      | ibr | pre, day 15 | A, F    |   | A       | A, F    |         |  |
| 44 | 2D, 3B, S1C, S4                                | M | 60 | IIA  | neg      | neg      | neg      | pos (88) | unmut             | 100          | mut     | ibr |             | A, R, F | A | A       | A, R, F |         |  |
| 45 | 1B, 1E, 1F, 2D, 3A, 3B, S1A, S1B, S1C, S1D, S4 | F | 54 | I    | neg      | neg      | pos (85) | neg      | unmut             | 100          | wt      | ibr |             | A, R, F |   | A, R, F |         | A       |  |
| 46 | 1B, 1E, 2D, 3B, S1A, S1B, S1C, S1D, S4         | F | 70 | ND   | neg      | neg      | neg      | pos (93) | unmut             | 100          | wt      | ibr |             | A, R, F |   | A, R, F |         |         |  |
| 47 | 1B, 1E, 2A, 2C, 2D, 3B, S1A, S1B, S1D, S4, S13 | M | 47 | IB   | pos (9)  | neg      | neg      | neg      | unmut             | 100          | mut/del | ibr | pre, week 2 | A, R, F |   | A       | A, R, F |         |  |
| 48 | 1B, 1E, S1C, S1D                               | M | 71 | IVB  | pos (85) | pos (15) | neg      | neg      | unmut             | 100          | mut/del | ibr |             | A       | A |         |         |         |  |
| 49 | 1B, 1E, 2D, 3B, 6G, S1A, S1B, S1D, S4          | M | 34 | IIIA | neg      | neg      | neg      | pos (94) | biclon (mut; mut) | 92.93; 94.44 | mut     | ibr |             | A, R, F |   | A       | A, R, F | A       |  |
| 50 | 2A                                             | M | 54 | IA   | neg      | pos (60) | neg      | pos (54) | unmut             | 100          | wt      | ibr | pre, day 8  |         |   |         |         |         |  |
| 51 | 2D, 3B, S4                                     | F | 58 | ND   | neg      | pos (ND) | neg      | neg      | unmut             | 100          | wt      | ibr |             | A, R, F |   |         |         | A, R, F |  |
| 52 | 5A                                             | M | 62 | IIB  | neg      | neg      | neg      | neg      | unmut             | 100          | wt      | ide | pre, week 5 |         |   |         |         |         |  |
| 53 | 5A                                             | F | 56 | N/A  | pos (66) | neg      | neg      | pos (94) | mut               | 97.2         | mut/del | ide | pre, week 4 |         |   |         |         |         |  |
| 54 | 5C                                             | F | 50 | IV A | neg      | pos (49) | neg      | neg      | unmut             | 100          | mut     | ide |             | A, R, F |   |         | A, R, F |         |  |
| 55 | 5C                                             | M | 78 | ND   | neg      | neg      | neg      | pos (91) | unmut             | 98.61        | wt      | ide |             | A, R, F |   |         | A, R, F |         |  |
| 56 | 5C                                             | M | 52 | IA   | neg      | pos (87) | neg      | pos (85) | unmut             | 100          | wt      | ide |             | A, R, F |   |         | A, R, F |         |  |
| 57 | 5C                                             | F | 59 | ND   | neg      | pos (93) | neg      | neg      | unmut             | 100          | wt      | ide |             | A, R, F |   |         | A, R, F |         |  |
| 58 | 5C                                             | F | 74 | ND   | neg      | neg      | pos (78) | neg      | unmut             | 99.3         | wt      | ide |             | A, R, F |   |         | A, R, F |         |  |
| 59 | 5C                                             | M | 61 | IV A | neg      | pos (86) | neg      | neg      | unmut             | 100          | wt      | ide |             | A, F    |   |         | A, F    |         |  |

|     |                      |   |    |      |          |          |          |          |                   |              |         |      |             |         |  |      |  |         |                   |
|-----|----------------------|---|----|------|----------|----------|----------|----------|-------------------|--------------|---------|------|-------------|---------|--|------|--|---------|-------------------|
| 60  | 5A                   | M | 57 | IV   | neg      | neg      | neg      | pos (95) | mut               | 92.23        | wt      | ide  | pre, week 4 |         |  |      |  |         |                   |
| 61  | 5C, 5A               | M | 62 | IV   | neg      | pos (96) | neg      | pos (94) | unmut             | 100          | wt      | ide  | pre, week 4 | A, R, F |  |      |  | A, R, F |                   |
| 62  | 5A                   | M | 56 | IV   | neg      | neg      | neg      | neg      | mut               | 95.8         | mut     | ide  | pre, week 4 |         |  |      |  |         |                   |
| 63  | 5A                   | M | 75 | IV   | neg      | neg      | neg      | pos (7)  | mut               | 95.8         | ND      | ide  | pre, week 4 |         |  |      |  |         |                   |
| 64  | 5C, 5A               | M | 66 | IV   | neg      | neg      | neg      | pos (58) | mut               | 92.4         | wt      | ide  | pre, week 4 | A, R, F |  |      |  | A, R, F |                   |
| 65  | 5A                   | M | 69 | I    | neg      | neg      | pos (69) | neg      | unmut             | 99.1         | wt      | ide  | pre, week 4 |         |  |      |  |         |                   |
| 66  | 5C                   | M | 67 | ND   | neg      | neg      | neg      | pos (98) | mut               | 97.92        | mut     | ide  |             | A, R, F |  |      |  | A, R, F |                   |
| 67  | 5B, 5C               | F | 63 | IV A | neg      | neg      | neg      | pos (55) | unmut             | 100          | mut     | ide  |             | A, R, F |  |      |  | A, R, F |                   |
| 68  | 5A, 5C               | F | 82 | IIB  | pos (22) | neg      | neg      | pos (24) | unmut             | 100          | mut/del | ide  | pre, week 2 | A, F    |  | A, F |  |         |                   |
| 123 | S7A, S9D             | F | 65 | IIIB | neg      | neg      | pos(70)  | pos(5)   | mut               | 93.33        | mut     | acal |             | A, R, F |  |      |  |         | A, R, F           |
| 124 | S7A, S9D             | M | 38 | IVA  | pos(23)  | pos(18)  | neg      | neg      | unmut             | 100          | mut     | acal |             | A, R, F |  |      |  |         | A, R, F           |
| 125 | S7A                  | M | 75 | IIIA | ND       | ND       | ND       | ND       | unmut             | 100          | mut     | acal |             | A, R, F |  |      |  | A, R, F |                   |
| 126 | S7A, S9D             | F | 63 | IIIA | ND       | ND       | ND       | ND       | mut               | 95.79        | ND      | acal |             | A, R, F |  |      |  | A, R, F |                   |
| 127 | S7A                  | M | 48 | IIB  | neg      | neg      | neg      | neg      | mut               | 96.18        | wt      | acal |             | A, R, F |  |      |  | A, R, F |                   |
| 128 | S7A, S9D             | F | 63 | IVA  | neg      | neg      | neg      | neg      | unmut             | 100          | wt      | acal |             | A, R, F |  |      |  |         | A, R, F (month 4) |
| 111 | 7F, G, S3, S7A       | M | 63 | ND   | neg      | neg      | neg      | pos(89)  | unmut             | 100          | mut     | acal |             | A, R, F |  |      |  |         | A, R, F           |
| 112 | 7F, G, S3, S7A, S11B | M | 44 | ND   | neg      | pos(93)  | neg      | pos(94)  | unmut             | 100          | wt      | acal |             | A, R, F |  |      |  |         | A, R, F           |
| 69  | 2I, 4H, 7H           | M | 66 | IA   | neg      | neg      | neg      | pos (52) | unmut             | 100          | wt      |      |             |         |  |      |  |         |                   |
| 70  | S14A                 | M | 79 | IIIA | neg      | neg      | neg      | pos (23) | unmut             | 100          | wt      |      |             |         |  |      |  |         |                   |
| 71  | 4H, 7H               | M | 70 | IIB  | neg      | neg      | neg      | pos (8)  | mut               | 94.39        | wt      |      |             |         |  |      |  |         |                   |
| 72  | S14A                 | F | 64 | IIIB | neg      | pos (9)  | neg      | pos (47) | unmut             | 100          | ND      |      |             |         |  |      |  |         |                   |
| 73  | 7D                   | M | 58 | IA   | neg      | neg      | neg      | pos (86) | unmut             | 98.26        | mut     |      |             |         |  |      |  |         |                   |
| 74  | 7C, D                | F | 63 | IA   | neg      | neg      | neg      | pos (30) | mut               | 97.22        | wt      |      |             |         |  |      |  |         |                   |
| 75  | 2L                   | M | 73 | 0A   | neg      | neg      | neg      | pos (64) | biclon (mut; mut) | 92.36; 92.98 | ND      |      |             |         |  |      |  |         |                   |

|     |                        |   |    |      |            |          |         |          |                         |                 |         |
|-----|------------------------|---|----|------|------------|----------|---------|----------|-------------------------|-----------------|---------|
| 76  | 7H                     | M | 73 | ND   | neg        | neg      | neg     | pos (95) | mut                     | 92.52           | wt      |
| 78  | S14A                   | F | 65 | IIA  | neg        | neg      | neg     | pos (95) | unmut                   | 98.6            | wt      |
| 79  | 7D                     | M | 72 | IVB  | ND         | ND       | ND      | ND       | mut                     | 89.47           | wt      |
| 80  | 2K, 4H                 | F | 50 | IIIA | neg        | neg      | neg     | pos (ND) | mut                     | 94.79           | wt      |
| 82  | 7C, D                  | M | 58 | I A  | neg        | neg      | neg     | pos (43) | unmut                   | 100             | wt      |
| 83  | S1A, S1B               | M | 57 | IV   | pos (60.5) | neg      | neg     | pos (96) | mut                     | 92.18           | mut/del |
| 84  | 6D                     | M | 56 | IIB  | neg        | neg      | neg     | pos (98) | unmut                   | 100             | wt      |
| 85  | 4G, 4H, 7H             | F | 61 | I A  | neg        | neg      | neg     | pos (46) | mut                     | 97.57           | wt      |
| 86  | 6D, S9A                | F | 64 | ND   | neg        | neg      | neg     | pos (94) | mut                     | 95.83           | wt      |
| 87  | 2K                     | M | 72 | IA   | neg        | neg      | neg     | pos (95) | mut                     | 87.29           | wt      |
| 88  | 6D, S9A                | F | 70 | IA   | neg        | pos (95) | neg     | pos (36) | mut                     | 97.89           | wt      |
| 89  | S14A                   | F | 59 | A    | neg        | pos (64) | neg     | pos (97) | unmut                   | 100             | wt      |
| 90  | S9A                    | F | 54 | IA   | neg        | neg      | neg     | pos (25) | mut                     | 89.24           | wt      |
| 91  | S14A                   | F | 71 | IA   | neg        | neg      | neg     | pos (59) | mut                     | 97.6            | wt      |
| 92  | S14A                   | F | 59 | IIIB | neg        | neg      | neg     | pos (90) | unmut                   | 100             | wt      |
| 93  | S14A                   | M | 74 | IVA  | neg        | neg      | neg     | pos (99) | unmut                   | 99.65           | mut     |
| 94  | 2K, 2L, 6D,<br>7H, S9A | F | 75 | 0A   | neg        | neg      | neg     | neg      | mut                     | 94.79           | wt      |
| 95  | 2L, 7H                 | M | 65 | 0A   | neg        | neg      | neg     | pos (51) | biclon<br>(mut;<br>mut) | 96.88;<br>95.19 | wt      |
| 96  | 2L, 7H                 | M | 60 | IIA  | neg        | neg      | neg     | pos (ND) | mut                     | 97.92           | wt      |
| 97  | 2K, 4H                 | M | 70 | II   | neg        | neg      | neg     | neg      | mut                     | 91.67           | wt      |
| 98  | 2L                     | M | 57 | IA   | neg        | neg      | neg     | neg      | mut                     | 92.63           | wt      |
| 99  | S14A                   | M | 70 | IA   | neg        | neg      | neg     | pos (99) | unmut                   | 99              | wt      |
| 100 | 6D                     | M | 65 | IIA  | neg        | neg      | neg     | pos (79) | unmut                   | 100             | wt      |
| 101 | S14A                   | F | 62 | IA   | neg        | neg      | neg     | pos (7)  | unmut                   | 100             | wt      |
| 102 | 7D                     | F | 76 | IB   | neg        | neg      | neg     | pos (ND) | mut                     | 96.56           | wt      |
| 103 | 2J, 2K, 4F,<br>6C      | F | 68 | IV B | neg        | pos (92) | neg     | pos (88) | mut                     | 93.75           | wt      |
| 104 | 6D, S9A                | M | 70 | IA   | neg        | neg      | neg     | pos (ND) | mut                     | 94.74           | mut     |
| 105 | 2L, 7H                 | F | 62 | IIB  | neg        | neg      | pos(66) | neg      | mut                     | 96.14           | wt      |

|     |                        |   |    |      |     |     |     |          |        |                 |     |
|-----|------------------------|---|----|------|-----|-----|-----|----------|--------|-----------------|-----|
| 106 | 4H, 7H                 | M | 56 | IVA  | neg | neg | neg | pos (81) | mut    | 96.53           | wt  |
| 107 | 6D, S9A                | M | 61 | IVB  | neg | neg | neg | pos (83) | unmut  | 100             | wt  |
| 108 | S14A                   | M | 71 | IIA  | neg | neg | neg | pos (14) | unmut  | 100             | wt  |
| 109 | S9B, C                 | F | 85 | IA   | ND  | ND  | ND  | ND       | unmut  | 100             | ND  |
| 110 | S3                     | M | 35 | ND   | neg | neg | neg | pos(95)  | unmut  | 100             | mut |
| 113 | 7A, B, D,<br>S10A      | M | 62 | IA   | neg | neg | neg | pos(86)  | mut    | 88.89           | wt  |
| 114 | 7A, B                  | M | 54 | IA/B | neg | pos | neg | neg      | unmut  | 100             | mut |
| 115 | 7A, B, D,<br>S9C, S10A | M | 75 | ND   | neg | neg | neg | pos(99)  | mut    | 91.67           | wt  |
| 116 | 7A, B, D,<br>S10A      | M | 75 | 0A   | neg | neg | neg | pos      | unmut  | 100             | mut |
| 117 | 7A, B, D,<br>S10A      | F | 54 | IA   | neg | neg | neg | pos(62)  | mut    | 94.79           | wt  |
| 118 | 7A, B, D,<br>S10A      | F | 63 | IV   | neg | neg | neg | pos(60)  | mut    | 90.53           | mut |
| 119 | S9C                    | M | 56 | IVB  | ND  | ND  | ND  | ND       | unmut  | 100             | ND  |
| 120 | S9C                    | M | 61 | III  | neg | neg | neg | pos(99)  | unmut  | 100             | mut |
| 121 | S9C                    | F | 73 | IA   | ND  | ND  | ND  | ND       | unmut  | 100             | mut |
| 122 | S9C                    | M | 84 | IV   | neg | pos | pos | neg      | biclon | 96.18;<br>98.26 | wt  |

\*M= male, F= female

\*\*ibrutinib= ibr, idelalisib= ide, acalabrutinib= acal

## References

1. Ian Mockridge C, et al. Reversible anergy of sIgM-mediated signaling in the two subsets of CLL defined by VH-gene mutational status. *Blood*. 2007;109(10):4424–4431.
2. Seda V, et al. FoxO1-GAB1 axis regulates homing capacity and tonic AKT activity in chronic lymphocytic leukemia. *Blood*. 2021;138(9):758–772.
3. Naeem A, et al. Pirtobrutinib targets BTK C481S in ibrutinib-resistant CLL but second-site BTK mutations lead to resistance. *Blood Adv*. 2023;7(9):1929–1943.
4. Coelho V, et al. Identification in CLL of circulating intraclonal subgroups with varying B-cell receptor expression and function. *Blood*. 2013;122(15):2664–2672.
5. Sharma S, et al. miR-29 modulates CD40 signaling in chronic lymphocytic leukemia by targeting TRAF4: an axis affected by BCR inhibitors. *Blood*. 2021;137(18):2481–2494.
6. Mraz M, et al. MicroRNA isolation and stability in stored RNA samples. *Biochem Biophys Res Commun*. 2009;390(1):1–4.
7. Pavlasova G, et al. Rituximab primarily targets an intra-clonal BCR signaling proficient CLL subpopulation characterized by high CD20 levels. *Leukemia*. 2018;32(9):2028–2031.
8. Martin M. Cutadapt removes adapter sequences from high-throughput sequencing reads. *EMBnet.journal*. 2011;17(1):10.
9. Hackenberg M, et al. miRanalyzer: a microRNA detection and analysis tool for next-generation sequencing experiments. *Nucleic Acids Res*. 2009;37(Web Server issue):W68–76.
10. Bolger AM, Lohse M, Usadel B. Trimmomatic: a flexible trimmer for Illumina sequence data. *Bioinforma Oxf Engl*. 2014;30(15):2114–2120.
11. Kozomara A, Griffiths-Jones S. miRBase: annotating high confidence microRNAs using deep sequencing data. *Nucleic Acids Res*. 2014;42(Database issue):D68–73.
12. Love MI, Huber W, Anders S. Moderated estimation of fold change and dispersion for RNA-seq data with DESeq2. *Genome Biol*. 2014;15(12):550.
13. Robinson MD, McCarthy DJ, Smyth GK. edgeR: a Bioconductor package for differential expression analysis of digital gene expression data. *Bioinforma Oxf Engl*. 2010;26(1):139–140.
14. Huber W, et al. Orchestrating high-throughput genomic analysis with Bioconductor. *Nat Methods*. 2015;12(2):115–121.
15. Andrews S. FastQC: A Quality Control Tool for High Throughput Sequence Data [Online]. 2010. <http://www.bioinformatics.babraham.ac.uk/projects/fastqc/>.
16. Dobin A, et al. STAR: ultrafast universal RNA-seq aligner. *Bioinforma Oxf Engl*. 2013;29(1):15–21.
17. Picard Tools - By Broad Institute. <http://broadinstitute.github.io/picard/> (accessed 19 Apr2018).
18. Liao Y, Smyth GK, Shi W. The R package Rsubread is easier, faster, cheaper and better for alignment and quantification of RNA sequencing reads. *Nucleic Acids Res*. 2019;47(8):e47.
19. Wang L, Wang S, Li W. RSeQC: quality control of RNA-seq experiments. *Bioinforma Oxf Engl*. 2012;28(16):2184–2185.
20. Okonechnikov K, Conesa A, García-Alcalde F. Qualimap 2: advanced multi-sample quality control for high-throughput sequencing data. *Bioinforma Oxf Engl*. 2016;32(2):292–294.
21. Saunders CT, et al. Strelka: accurate somatic small-variant calling from sequenced tumor-normal sample pairs. *Bioinforma Oxf Engl*. 2012;28(14):1811–1817.
22. Lai Z, et al. VarDict: a novel and versatile variant caller for next-generation sequencing in cancer research. *Nucleic Acids Res*. 2016;44(11):e108.
23. Benjamin D, et al. *Calling Somatic SNVs and Indels with Mutect2*. Bioinformatics; 2019.
24. Koboldt DC, et al. VarScan 2: Somatic mutation and copy number alteration discovery in cancer by exome sequencing. *Genome Res*. 2012;22(3):568–576.
25. McLaren W, et al. The Ensembl Variant Effect Predictor. *Genome Biol*. 2016;17(1):122.
26. Janssens D. *CUT&RUN: Targeted in situ genome-wide profiling with high efficiency for low cell numbers v3*. 2019.
27. Liu N. *Library Prep for CUT&RUN with NEBNext® Ultra™ II DNA Library Prep Kit for Illumina® (E7645) v2*. 2019.
28. Zhu Q, et al. CUT&RUNTools: a flexible pipeline for CUT&RUN processing and footprint analysis. *Genome Biol*. 2019;20(1):192.



29. Bailey TL, Machanick P. Inferring direct DNA binding from ChIP-seq. *Nucleic Acids Res.* 2012;40(17):e128.
30. Mraz M, et al. miR-150 influences B-cell receptor signaling in chronic lymphocytic leukemia by regulating expression of GAB1 and FOXP1. *Blood.* 2014;124(1):84–95.
31. Quah BJC, Warren HS, Parish CR. Monitoring lymphocyte proliferation in vitro and in vivo with the intracellular fluorescent dye carboxyfluorescein diacetate succinimidyl ester. *Nat Protoc.* 2007;2(9):2049–2056.
32. Hoferkova E, et al. Stromal cells engineered to express T cell factors induce robust CLL cell proliferation in vitro and in PDX co-transplantations allowing the identification of RAF inhibitors as anti-proliferative drugs. *Leukemia.* [published online ahead of print: June 14, 2024]. <https://doi.org/10.1038/s41375-024-02284-w>.
33. Roederer M. Interpretation of cellular proliferation data: Avoid the panglossian. *Cytometry A.* 2011;79A(2):95–101.
34. Xie Z, et al. Gene Set Knowledge Discovery with Enrichr. *Curr Protoc.* 2021;1(3). <https://doi.org/10.1002/cpz1.90>.
35. Lu J, et al. Multi-omics reveals clinically relevant proliferative drive associated with mTOR-MYC-OXPPOS activity in chronic lymphocytic leukemia. *Nat Cancer.* 2021;2(8):853–864.
36. Dominguez-Sola D, et al. The FOXO1 Transcription Factor Instructs the Germinal Center Dark Zone Program. *Immunity.* 2015;43(6):1064–1074.
